# Supplementary material for: Stereoselective synthesis of cyclopentanone-fused benzosultams through Tomita zipper cyclization
Source: Royal Society of Chemistry journal article supplement (doi:10.1039/c6ob01096b), 2016-01-01

*Supporting Information-II*

# **Stereoselective Synthesis of Cyclopentanone-fused Benzosultams through Tomita Zipper Cyclization**

**Dhevalapally B. Ramachary,\* Patoju M. Krishna, and T. Prabhakar Reddy**

*Catalysis Laboratory, School of Chemistry, University of Hyderabad, Central University (P.O.),  
Hyderabad 500 046, India*

*E-mail: [ramsc@uohyd.ac.in](mailto:ramsc@uohyd.ac.in) or [ramchary.db@gmail.com](mailto:ramchary.db@gmail.com)*

7.989  
7.972  
7.913  
7.893  
7.870  
7.860  
7.851  
7.847  
7.778  
7.766  
7.759  
7.747  
7.728  
7.699  
7.681  
7.663  
7.645  
7.633  
7.614  
7.443  
7.426  
7.407  
7.396  
7.384  
7.376  
7.370  
7.267  
7.224  
6.976  
4.330  
4.321  
4.303  
4.286  
4.280  
4.262  
4.245  
4.227  
3.596  
3.551  
2.916  
2.871  
2.810  
2.764  
1.295  
1.277  
1.257  
1.239  
1.221

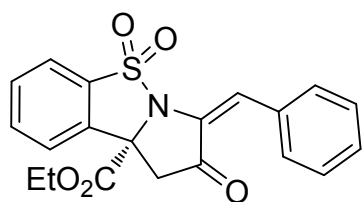

**5aa**

Product-5aa

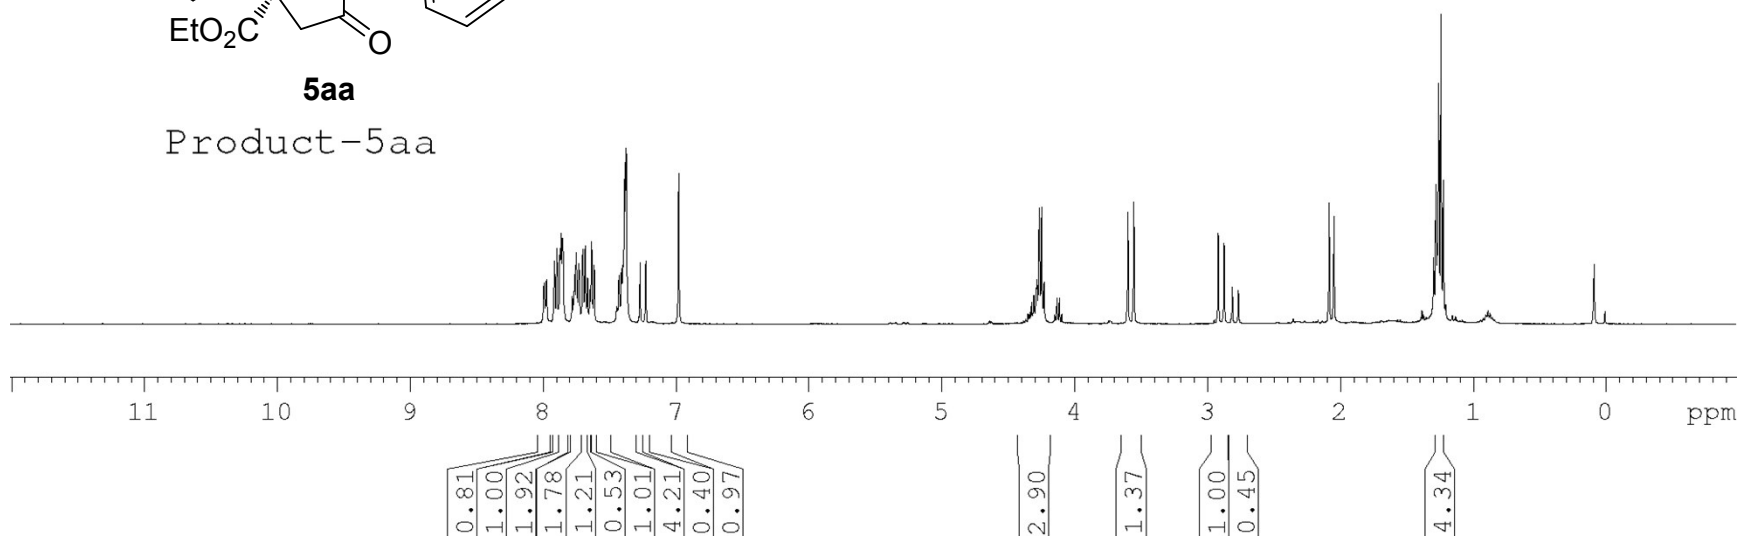

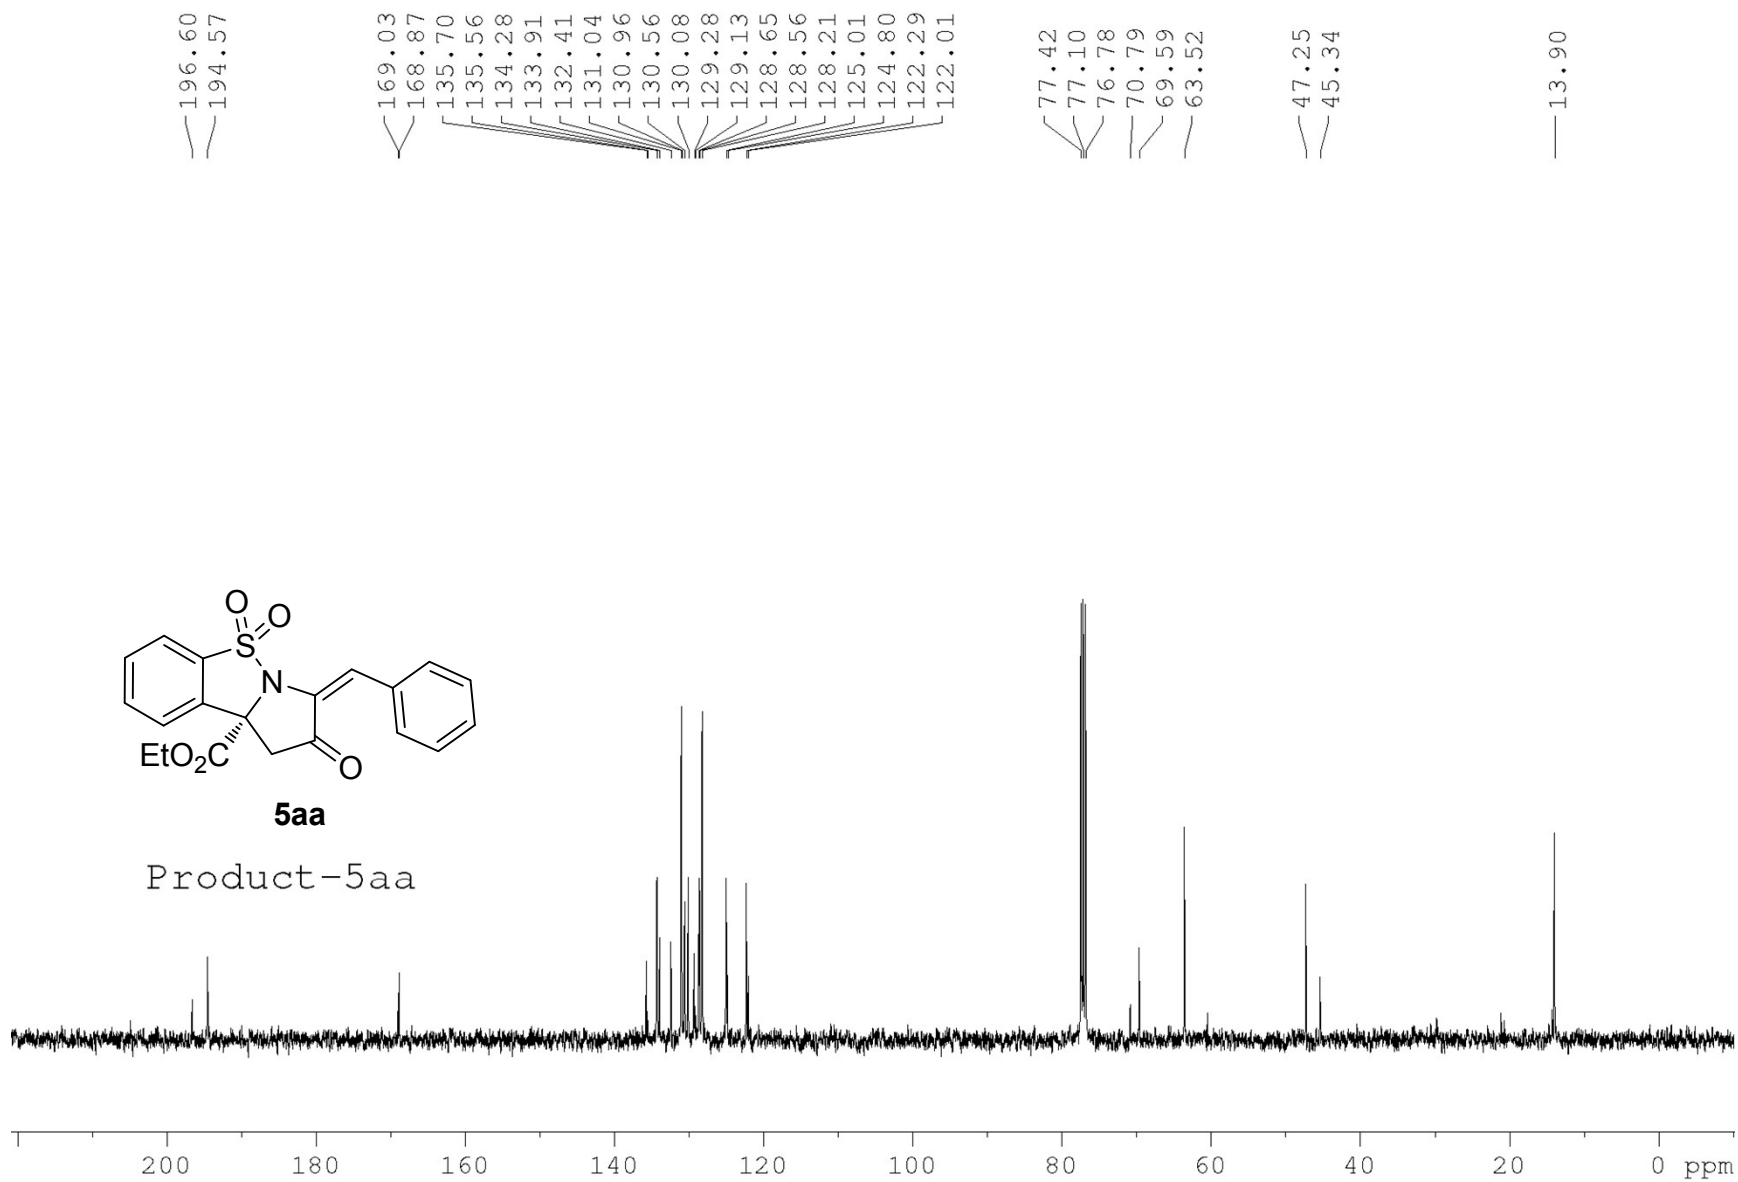

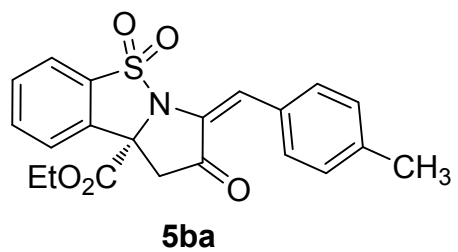

Product-5ba

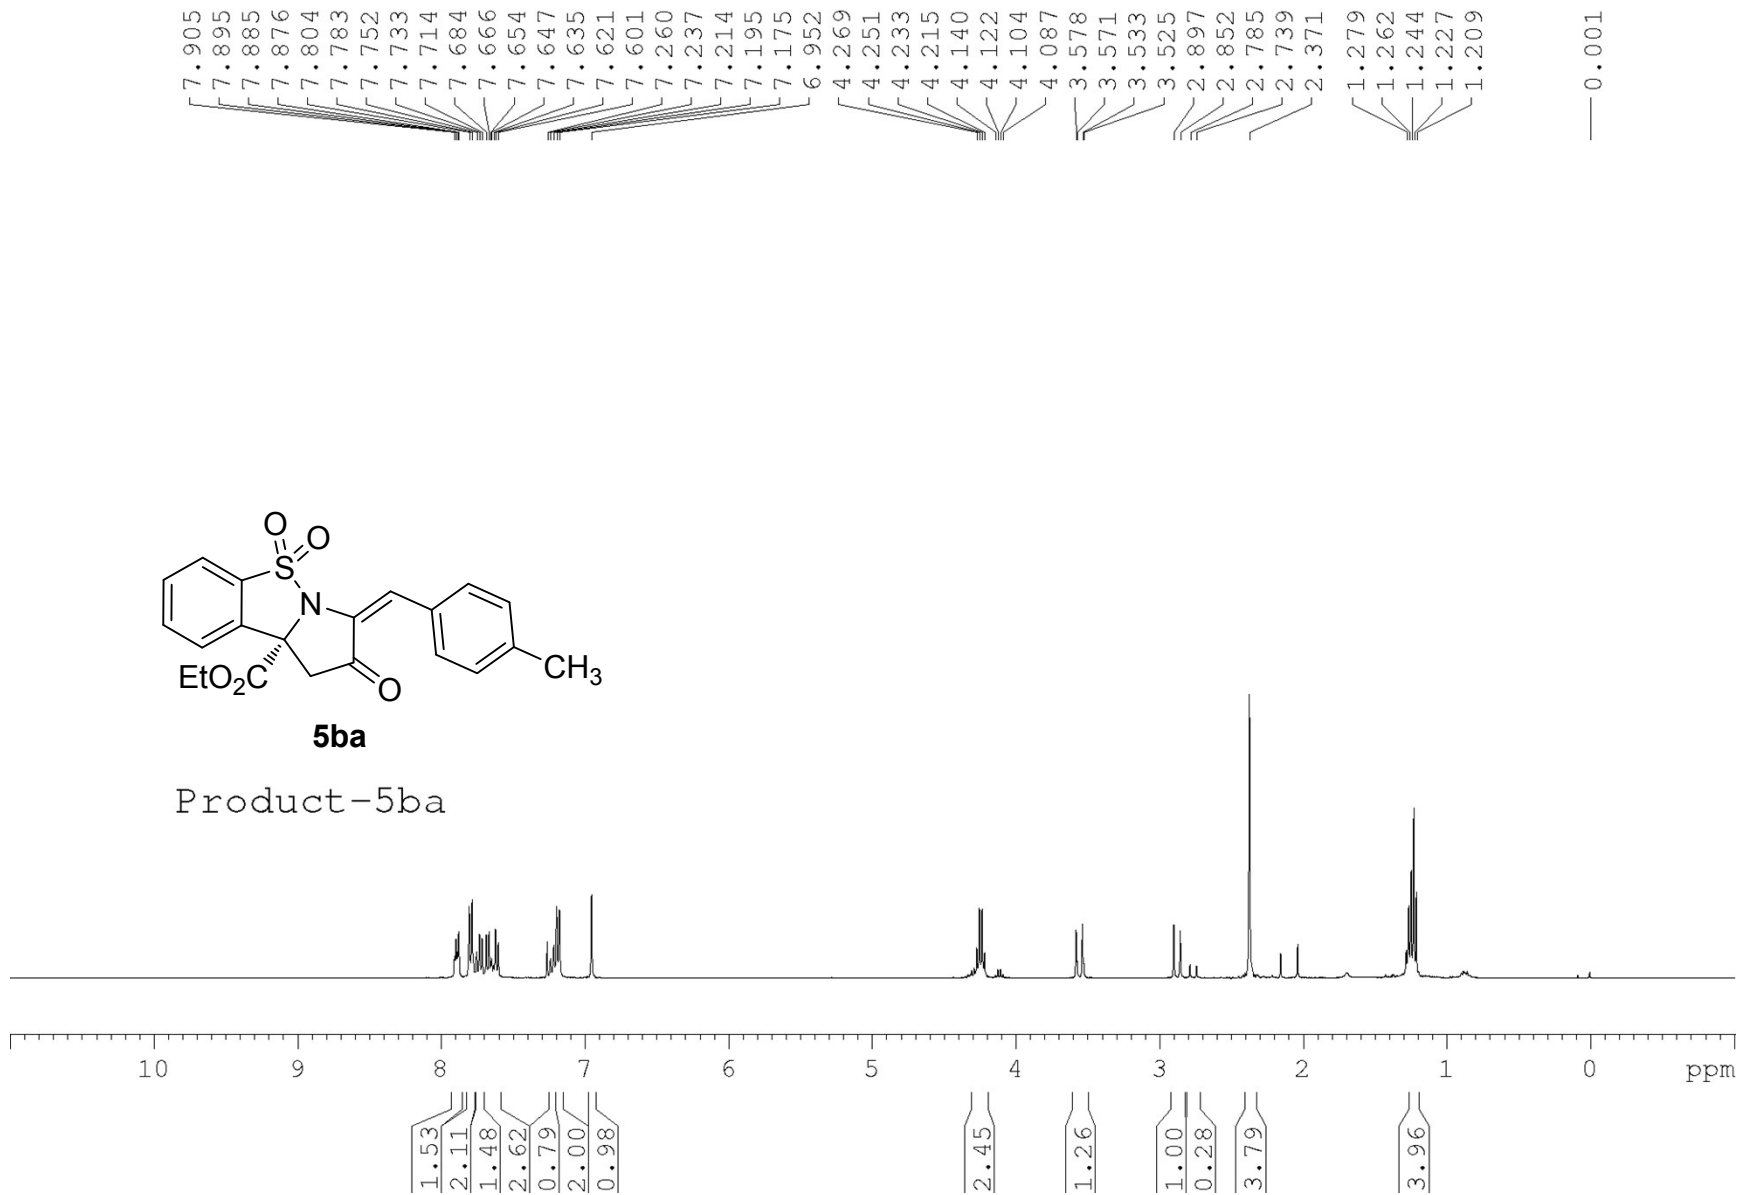

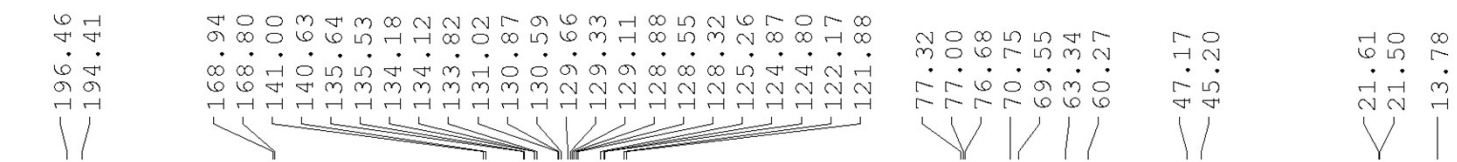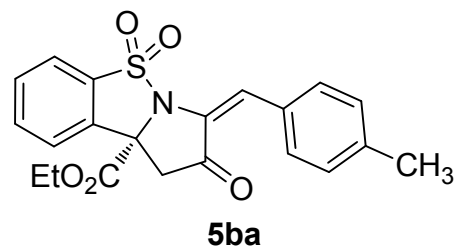

Product-5ba

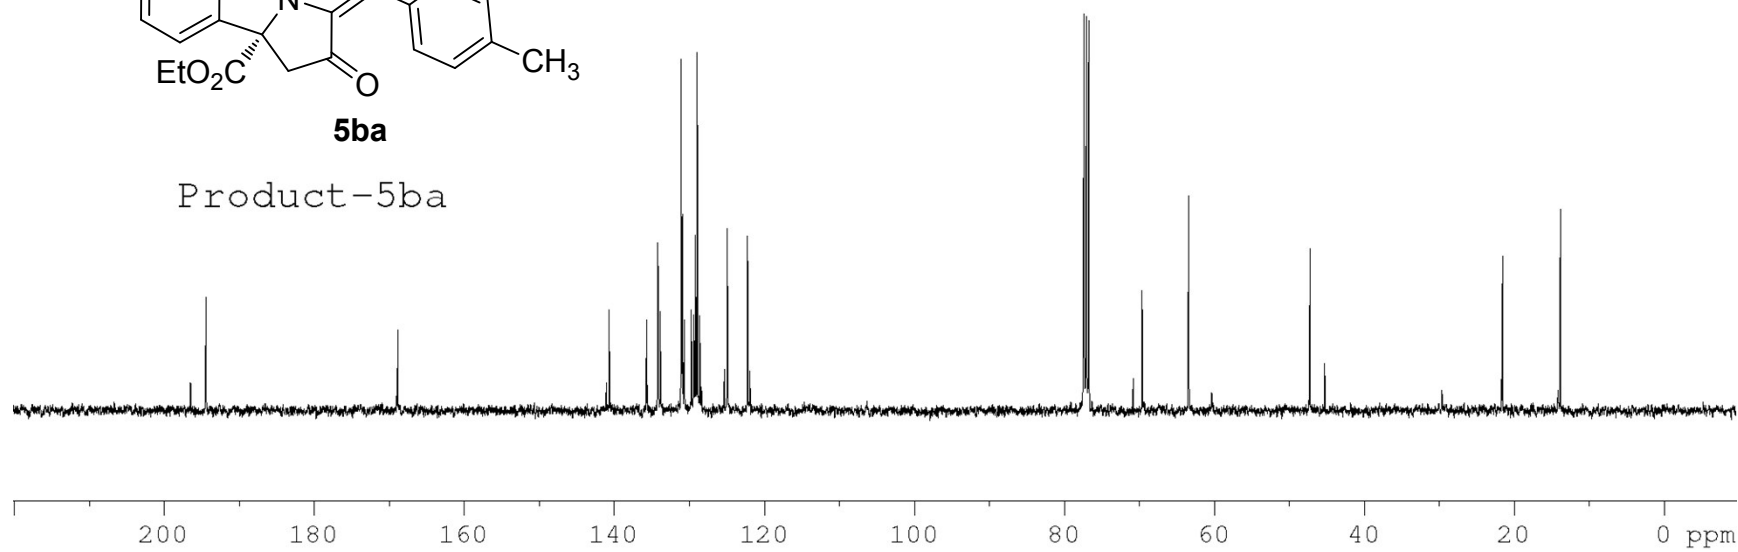

8.004  
7.990  
7.982  
7.968  
7.908  
7.892  
7.872  
7.789  
7.769  
7.751  
7.733  
7.702  
7.684  
7.666  
7.657  
7.628  
7.609  
7.260  
7.176  
7.122  
7.101  
7.075  
7.053  
7.031  
6.916  
4.314  
4.296  
4.283  
4.277  
4.259  
4.242  
4.224  
3.594  
3.579  
3.549  
3.533  
2.909  
2.864  
2.802  
2.756  
1.286  
1.268  
1.252  
1.234  
1.216

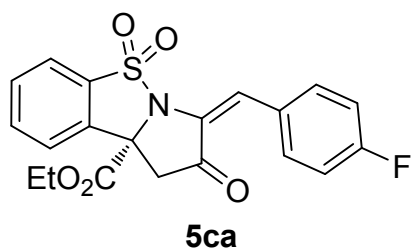

Product-5ca

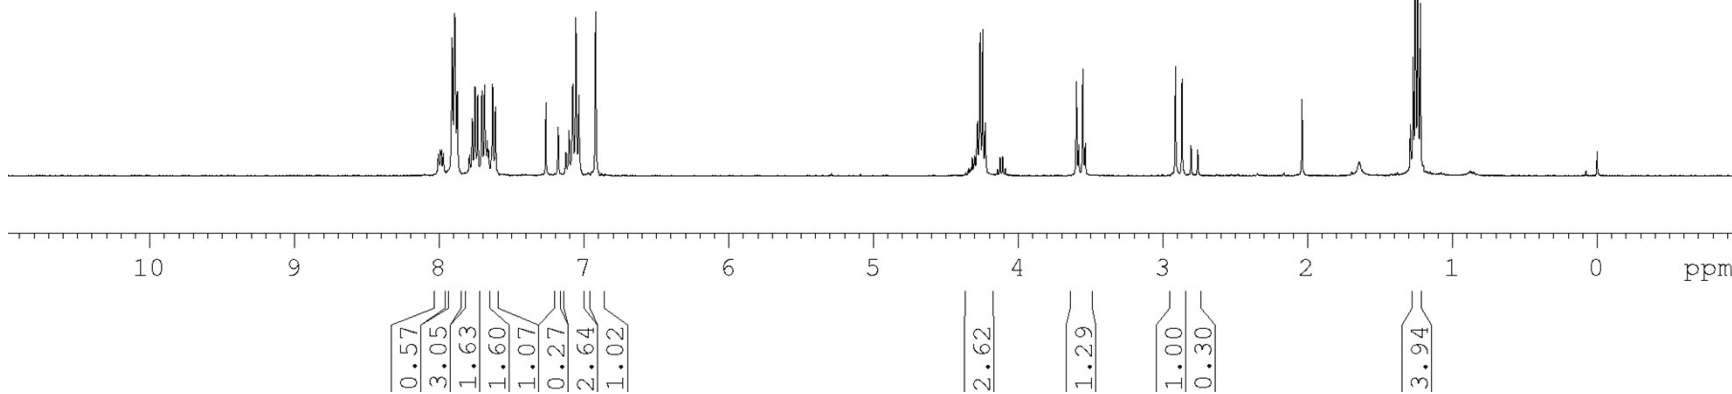

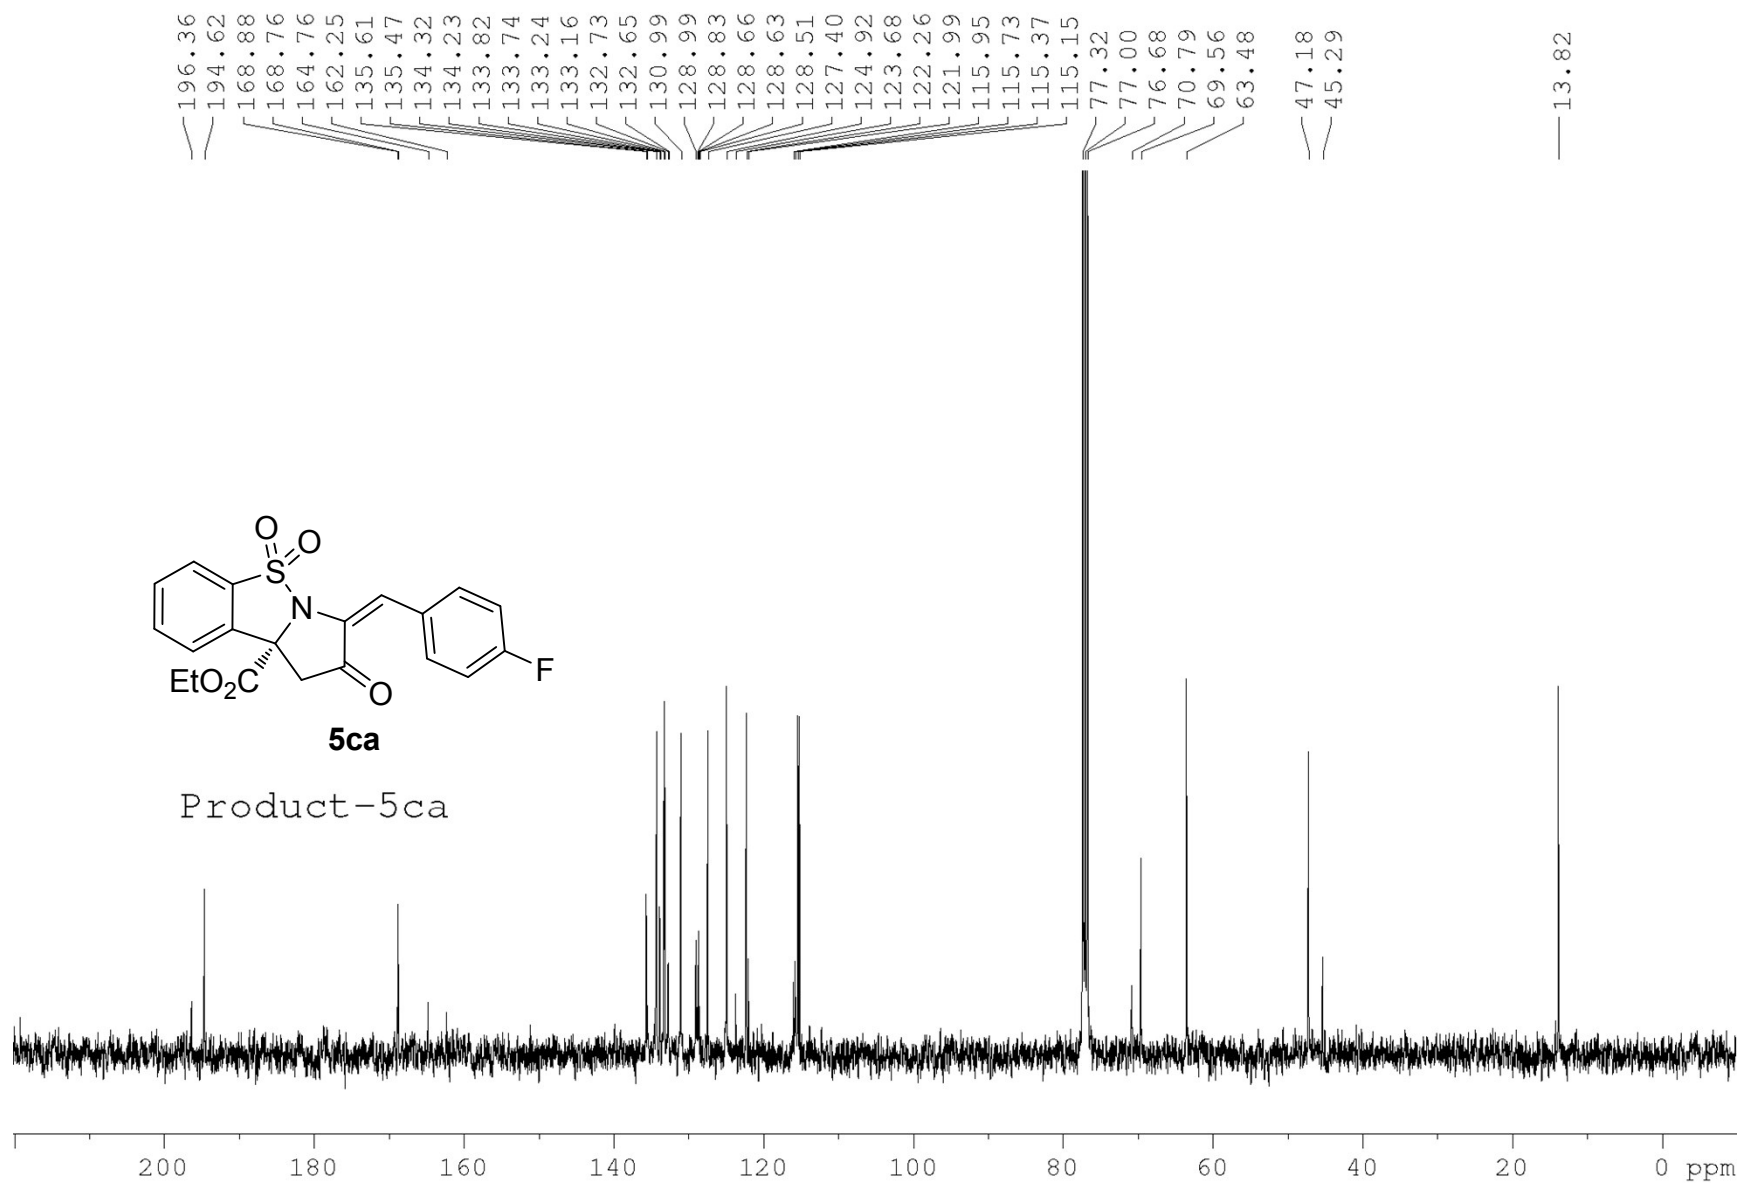

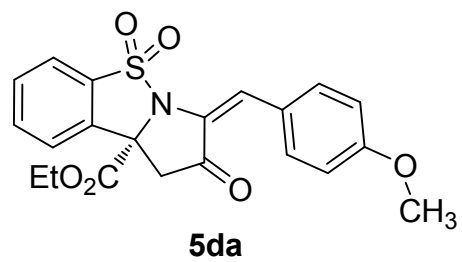

Product-5da

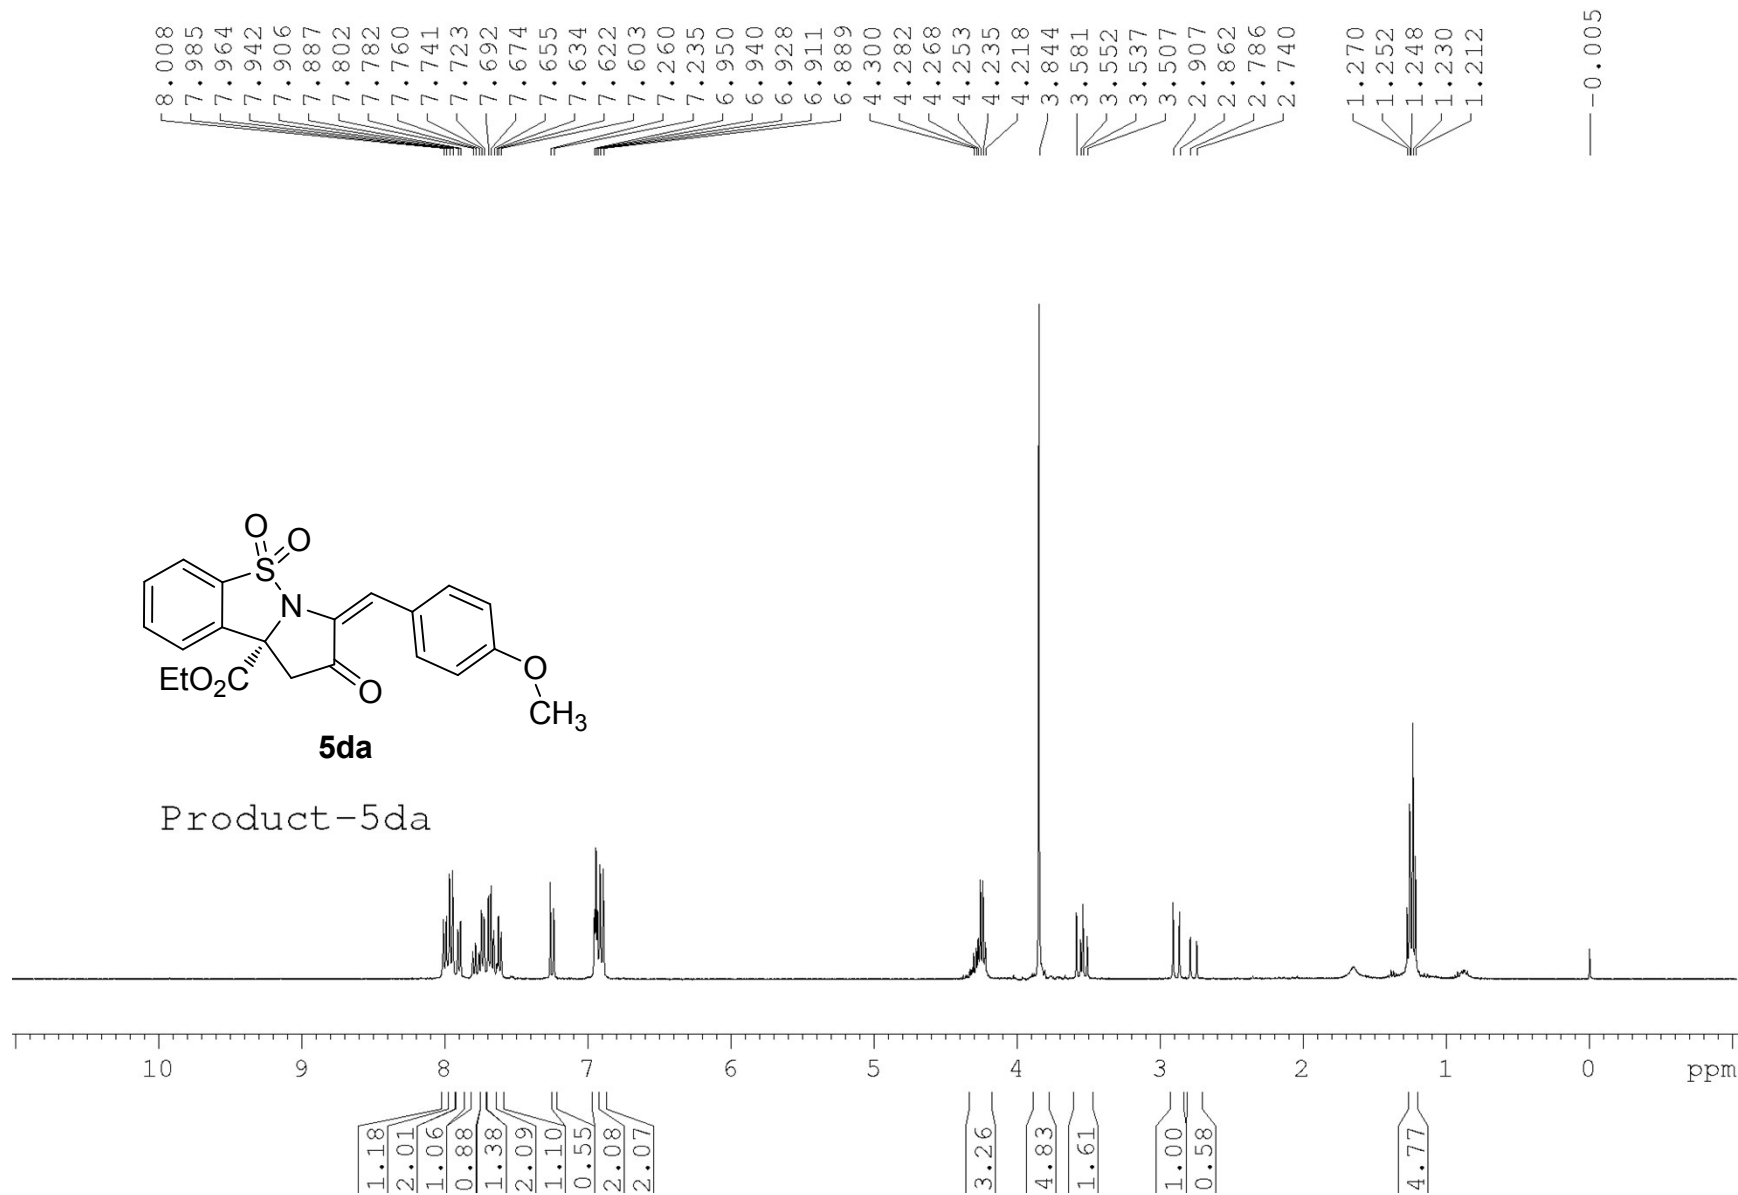



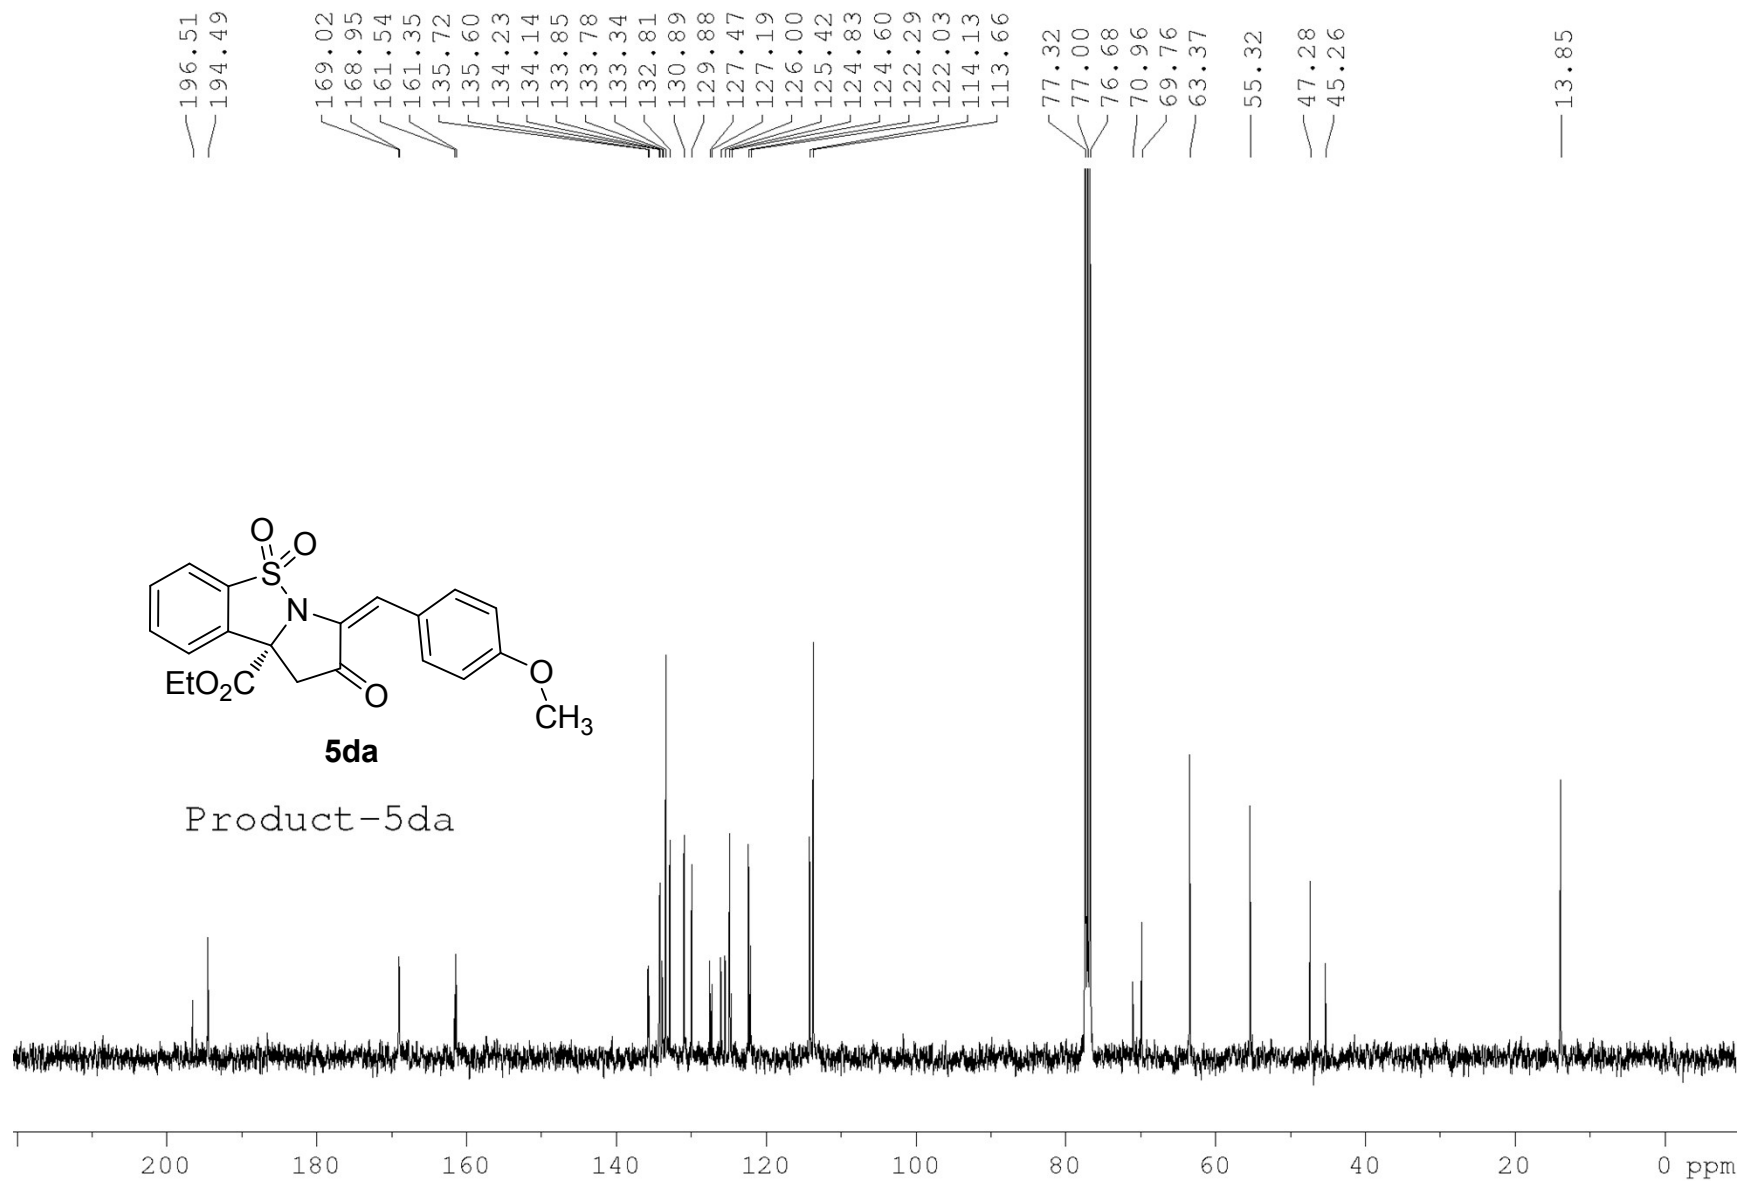



7.885  
7.864  
7.840  
7.819  
7.808  
7.788  
7.718  
7.696  
7.690  
7.657  
7.652  
7.636  
7.632  
7.621  
7.604  
7.599  
7.260  
7.242  
7.224  
7.205  
7.185  
6.946  
4.360  
4.351  
4.342  
4.333  
4.324  
4.315  
4.299  
4.293  
4.285  
4.275  
4.267  
4.257  
4.249  
4.239  
4.230  
4.212  
3.536  
3.532  
3.491  
3.486  
2.914  
2.870  
2.803  
2.757  
2.380  
1.305  
1.287  
1.276  
1.270  
1.259  
1.241

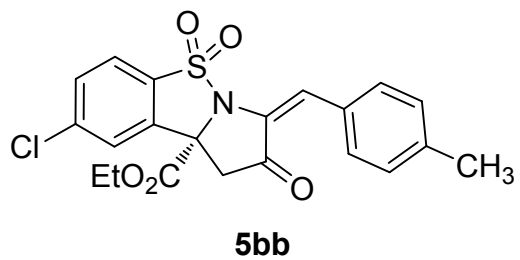

Product-5bb

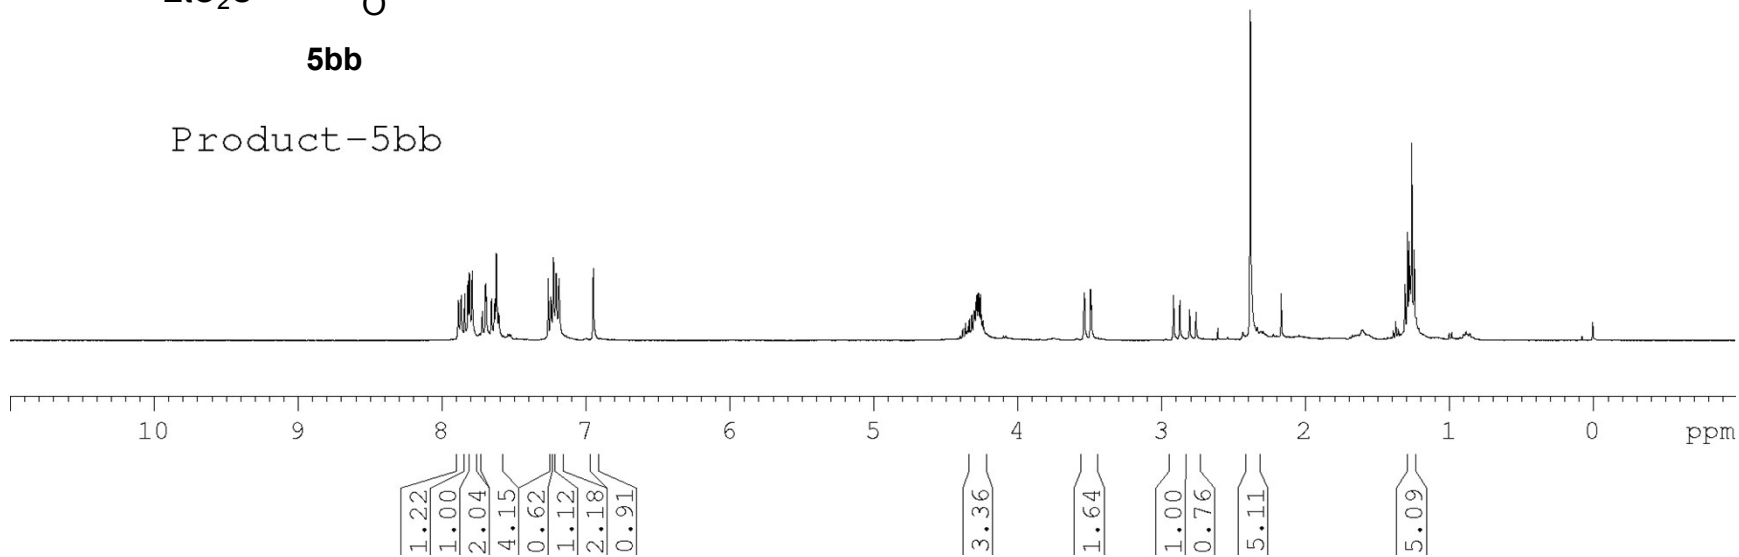

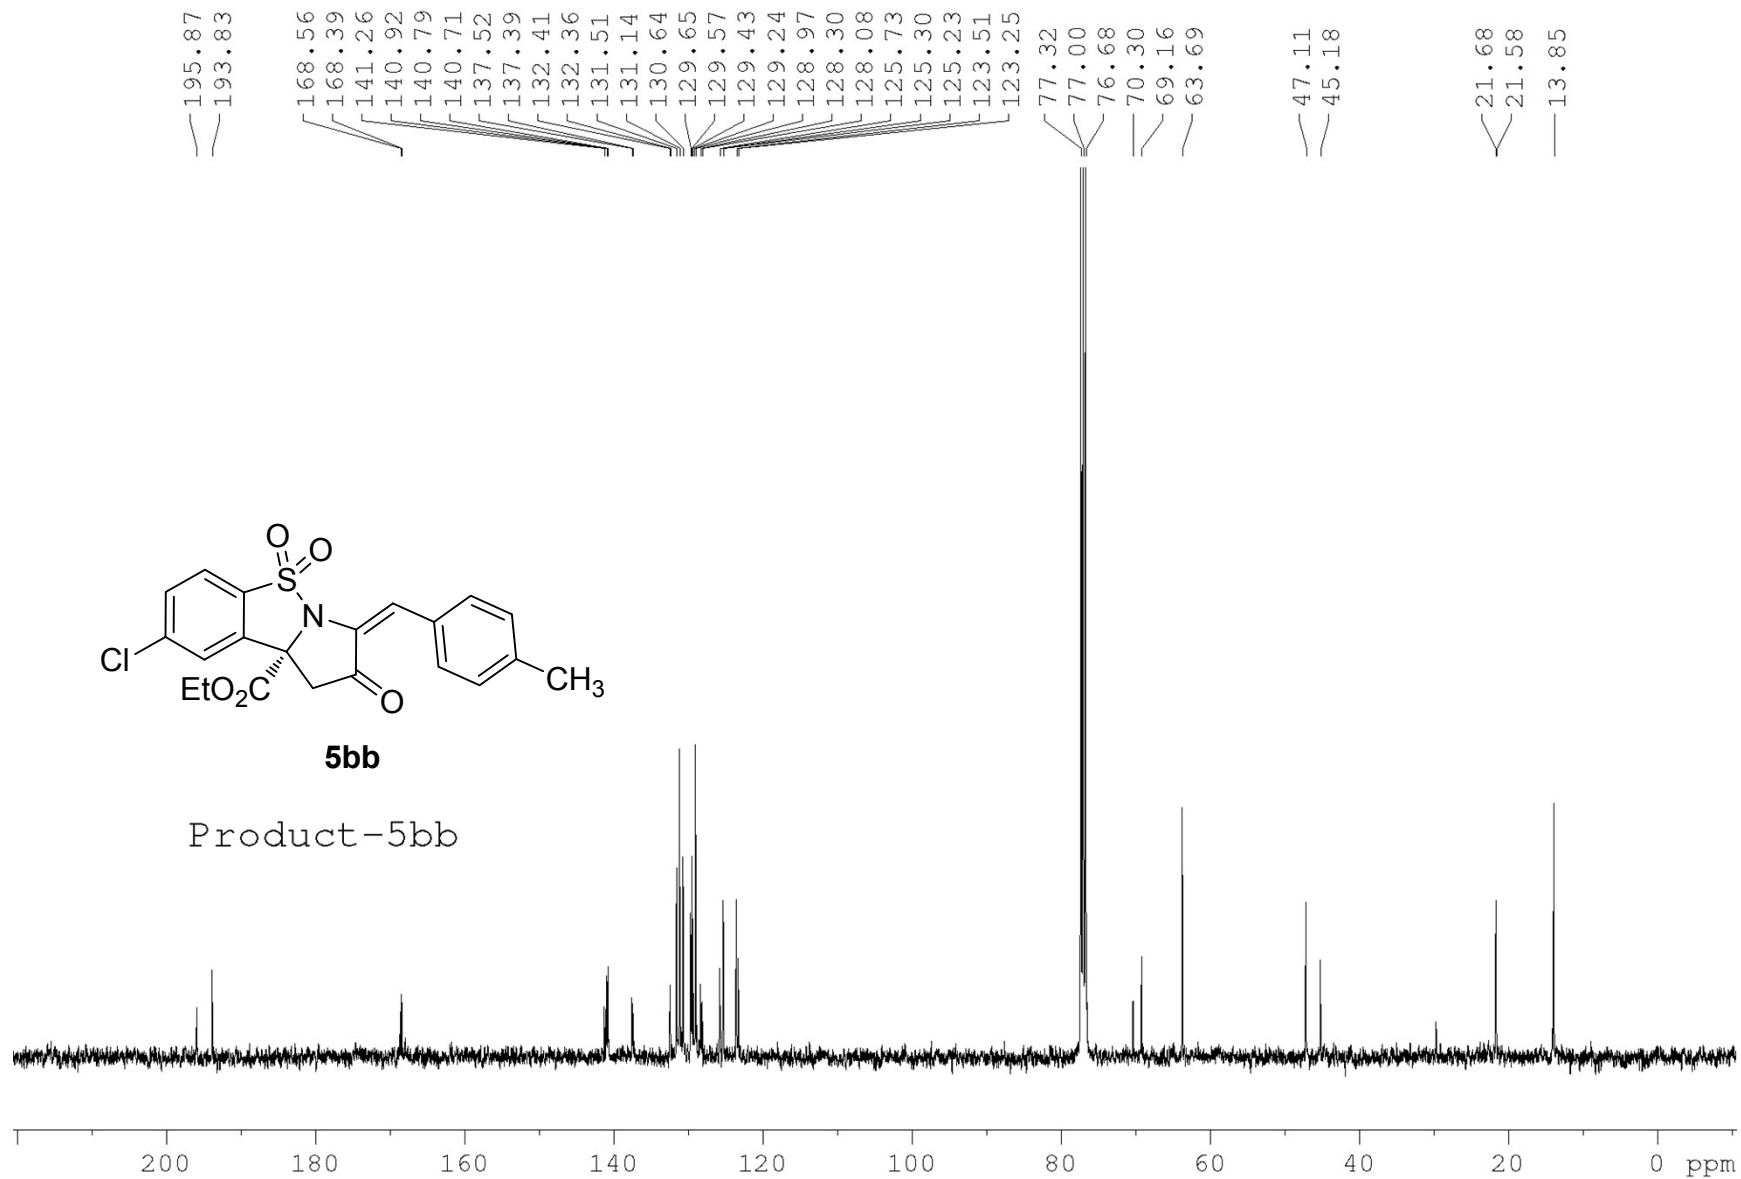

7.984  
7.970  
7.962  
7.948  
7.913  
7.899  
7.892  
7.878  
7.845  
7.825  
7.726  
7.705  
7.699  
7.668  
7.664  
7.647  
7.643  
7.638  
7.633  
7.622  
7.618  
7.260  
7.184  
7.127  
7.105  
7.084  
7.062  
7.041  
6.909  
4.358  
4.348  
4.339  
4.327  
4.321  
4.309  
4.299  
4.290  
4.281  
4.272  
4.264  
4.254  
4.246  
4.237  
3.551  
3.538  
3.507  
3.492  
2.920  
2.876  
2.814  
2.768  
1.309  
1.291  
1.281  
1.273  
1.263  
1.254  
1.245

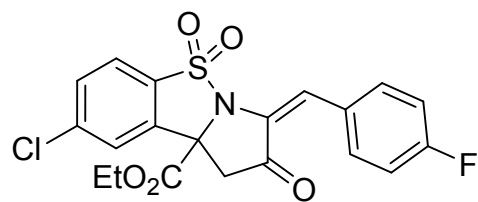

**5cb**

Product-5cb

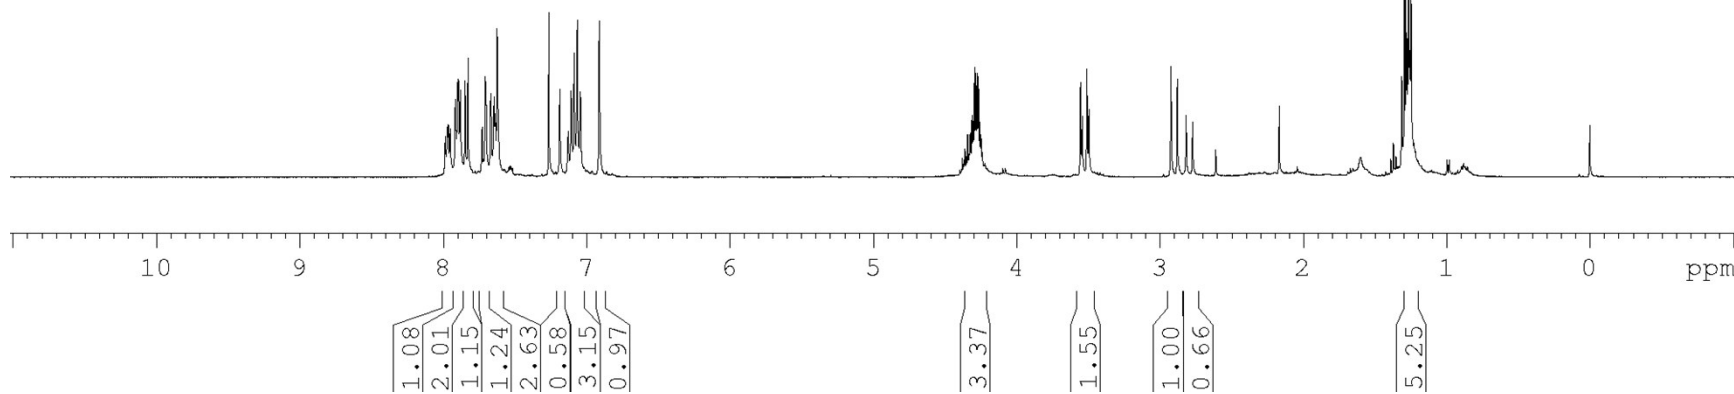

195.73  
 194.00  
 168.42  
 168.27  
 164.97  
 164.87  
 162.46  
 162.36  
 140.93  
 140.82  
 137.44  
 137.26  
 133.32  
 133.23  
 132.74  
 132.65  
 132.33  
 132.22  
 131.62  
 131.57  
 128.80  
 128.74  
 128.57  
 128.52  
 128.49  
 128.35  
 128.32  
 127.79  
 125.34  
 125.29  
 124.01  
 123.51  
 123.26  
 116.01  
 115.80  
 115.44  
 115.22  
 77.32  
 77.00  
 76.68  
 70.29  
 69.12  
 63.76  
 47.05  
 45.18  
 13.86  
 13.84

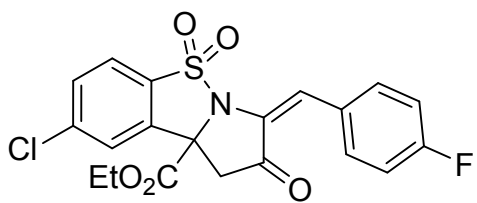

**5cb**

Product-5cb

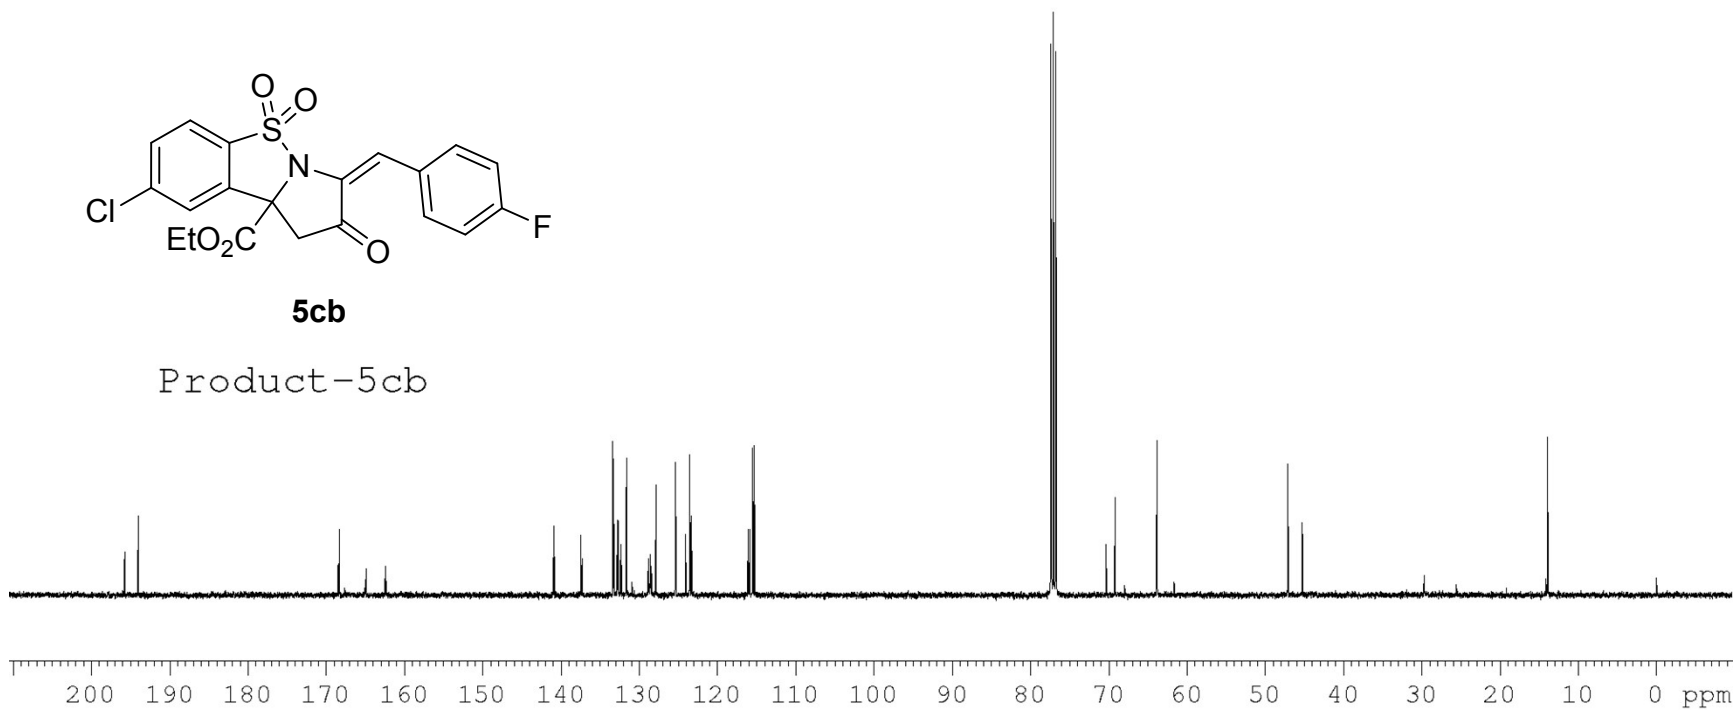

7.962  
7.940  
7.926  
7.904  
7.827  
7.806  
7.725  
7.704  
7.686  
7.682  
7.640  
7.636  
7.612  
7.596  
7.592  
7.260  
7.210  
7.070  
7.048  
7.037  
7.015  
6.908  
5.230  
5.223  
5.213  
5.205  
5.193  
5.176  
4.312  
4.299  
4.294  
4.291  
4.281  
4.272  
4.263  
4.255  
4.245  
4.237  
4.228  
4.219  
3.525  
3.503  
3.480  
3.471  
3.465  
2.911  
2.866  
2.788  
2.742  
1.282  
1.263  
1.245  
1.227

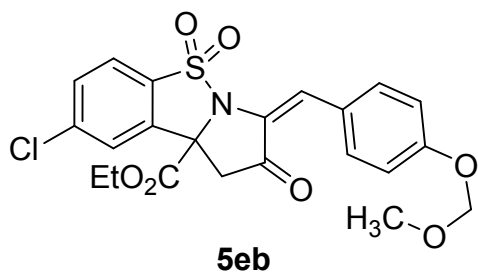

Product-5eb

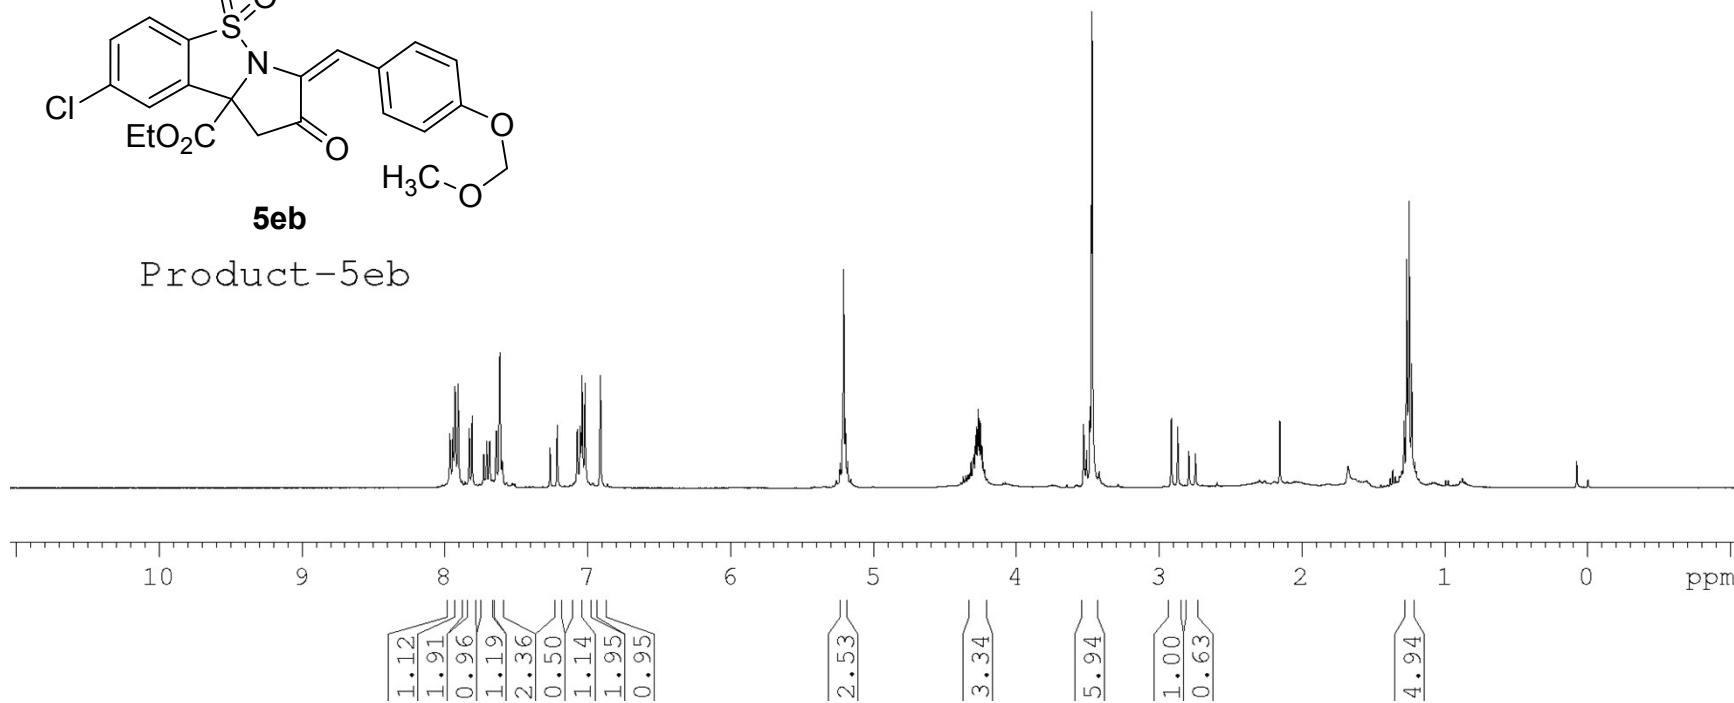

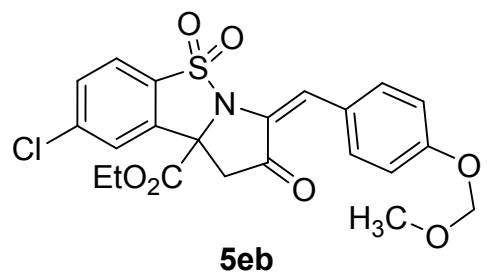

Product-5eb

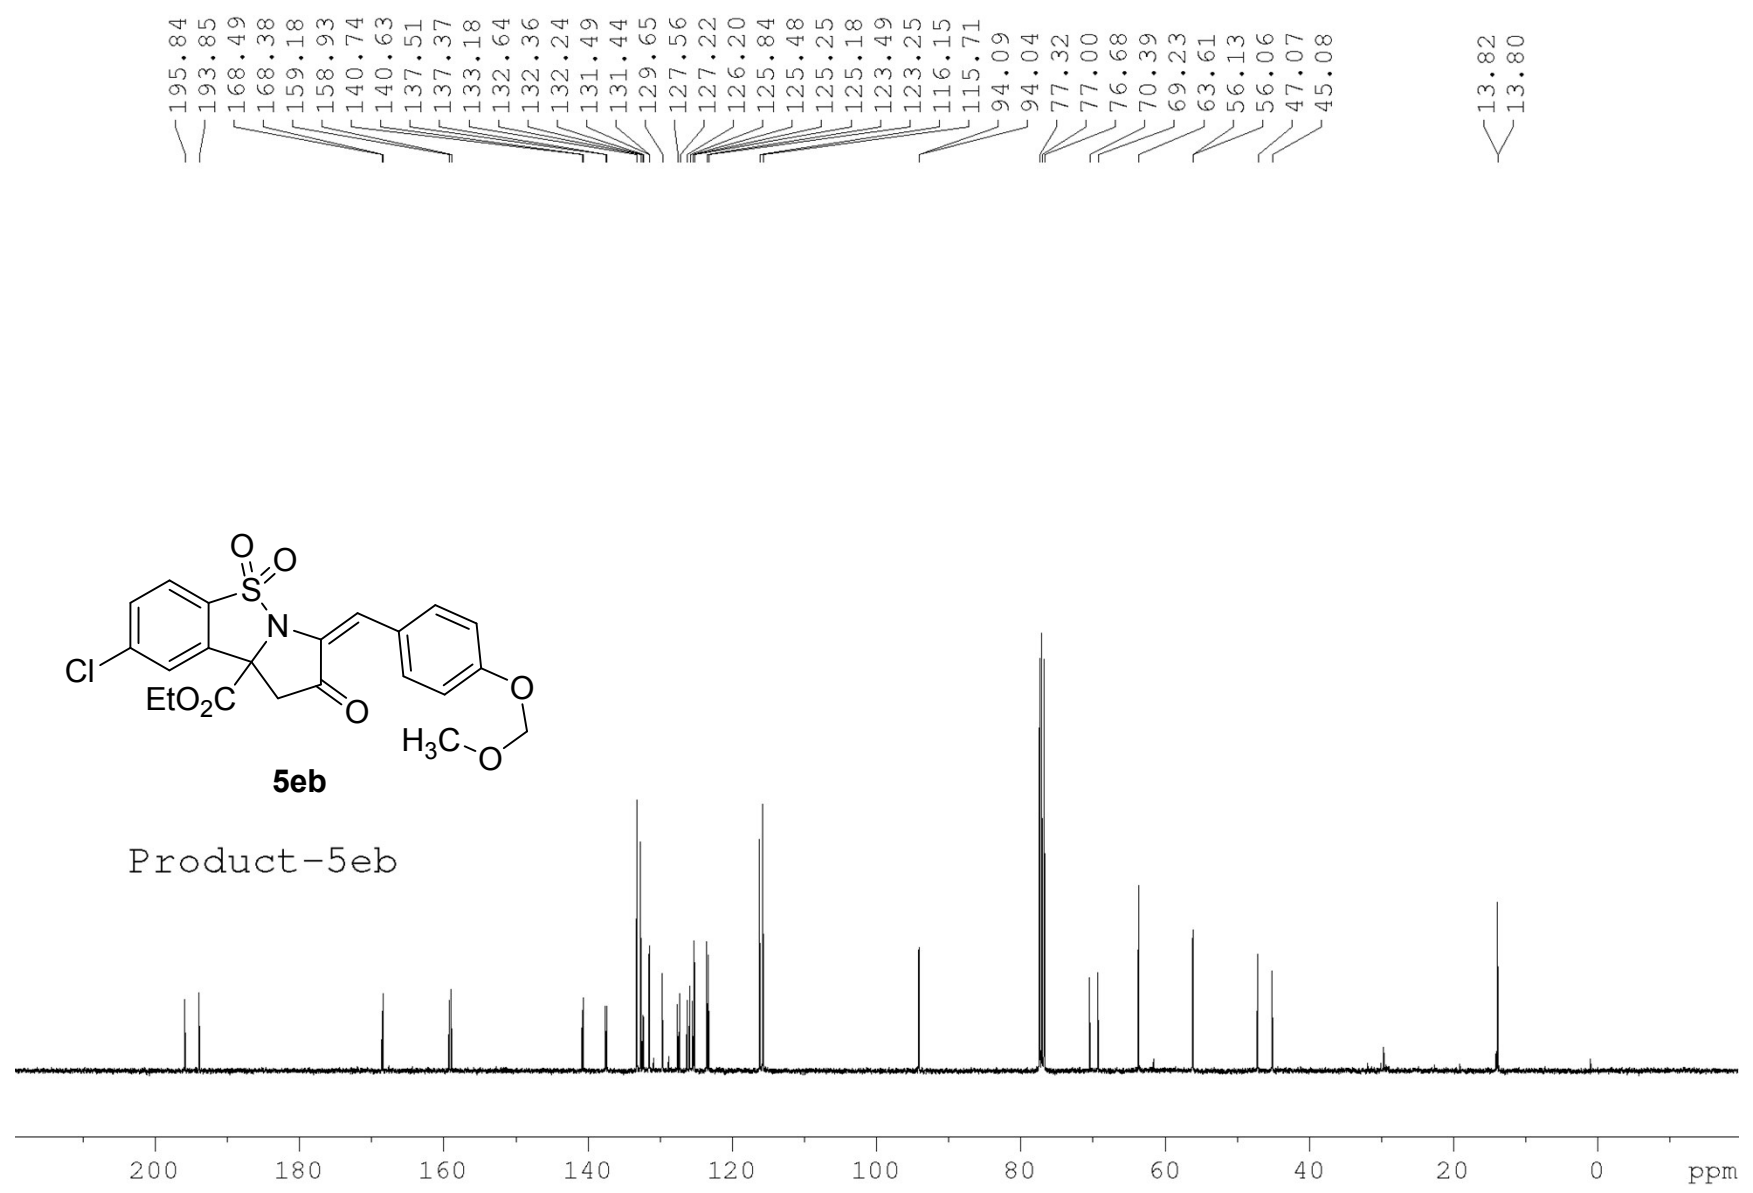



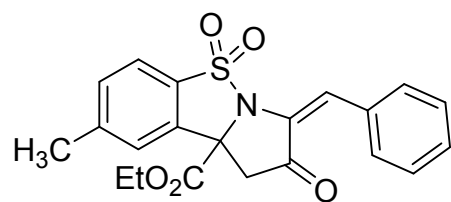

**5ac**

Product-5ac

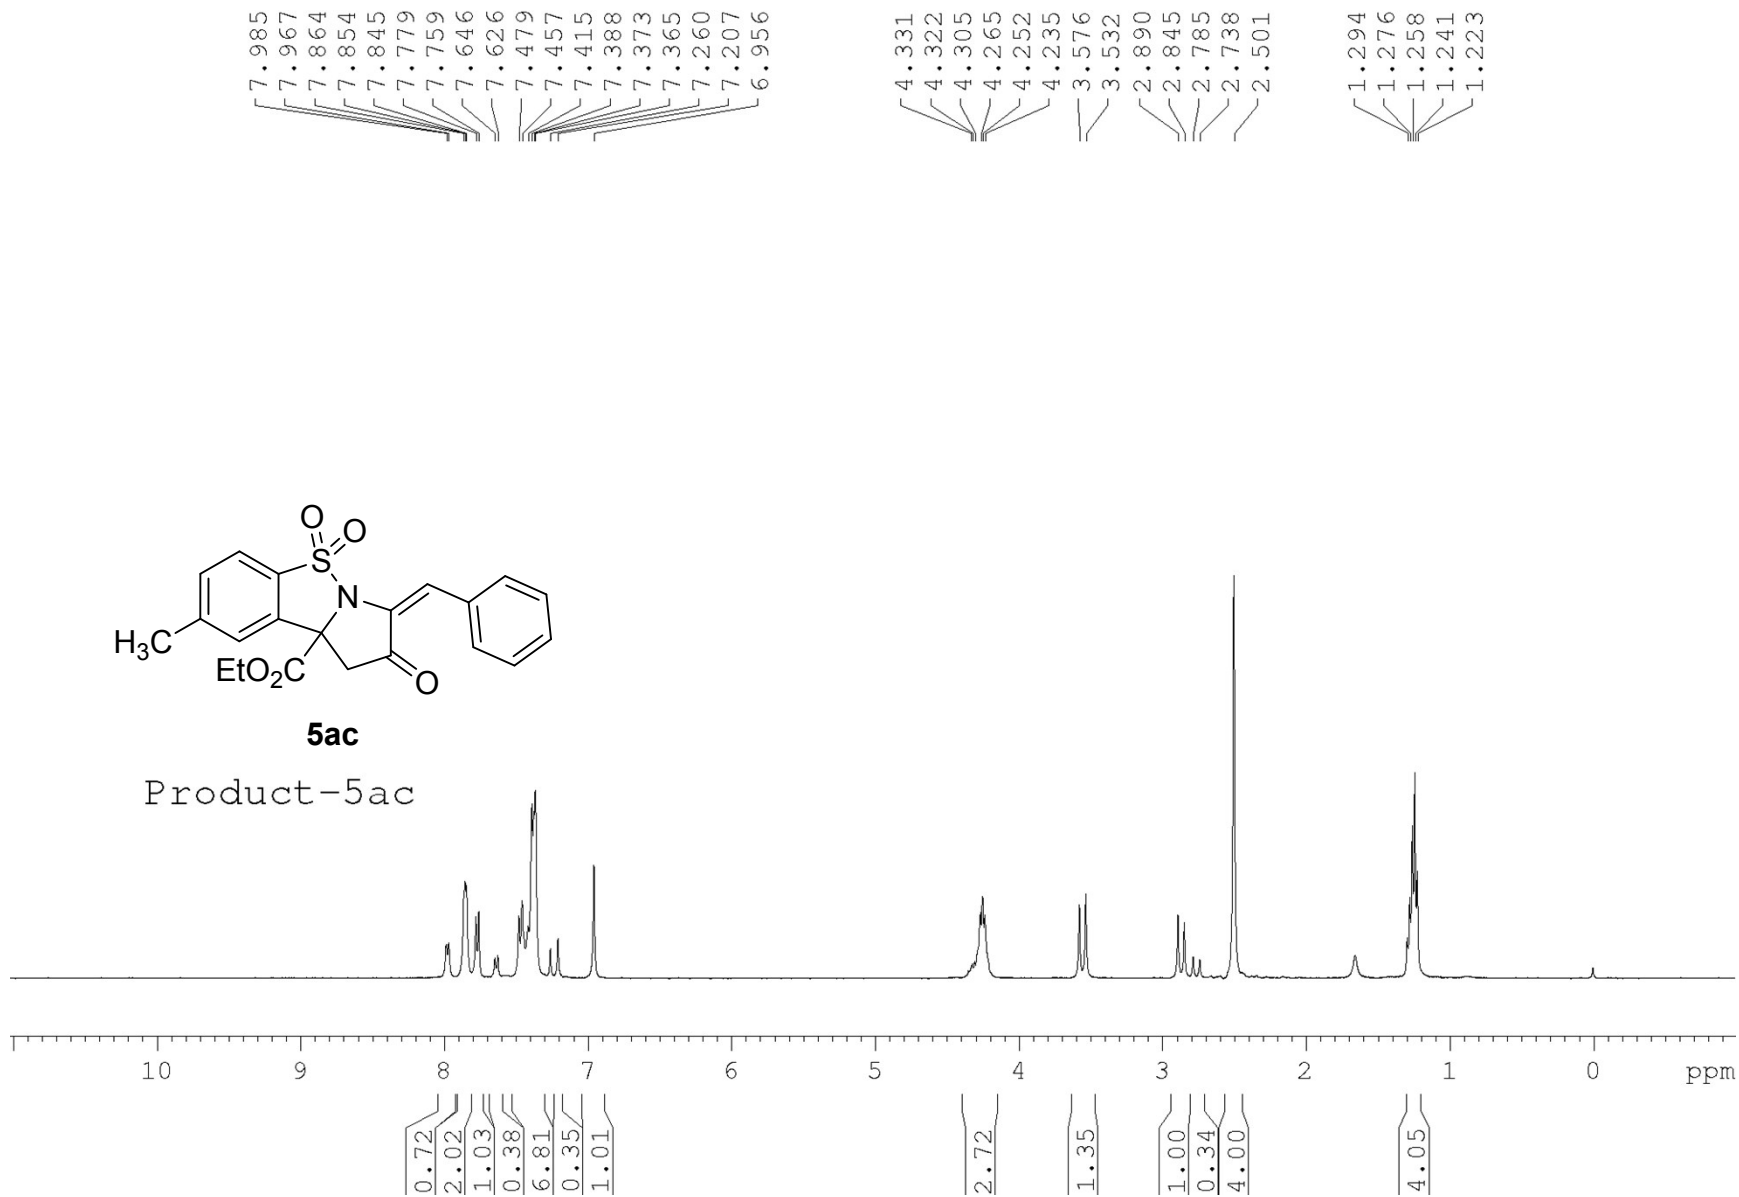

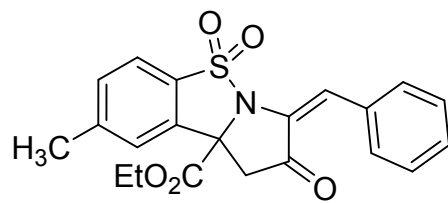

**5ac**

Product-5ac

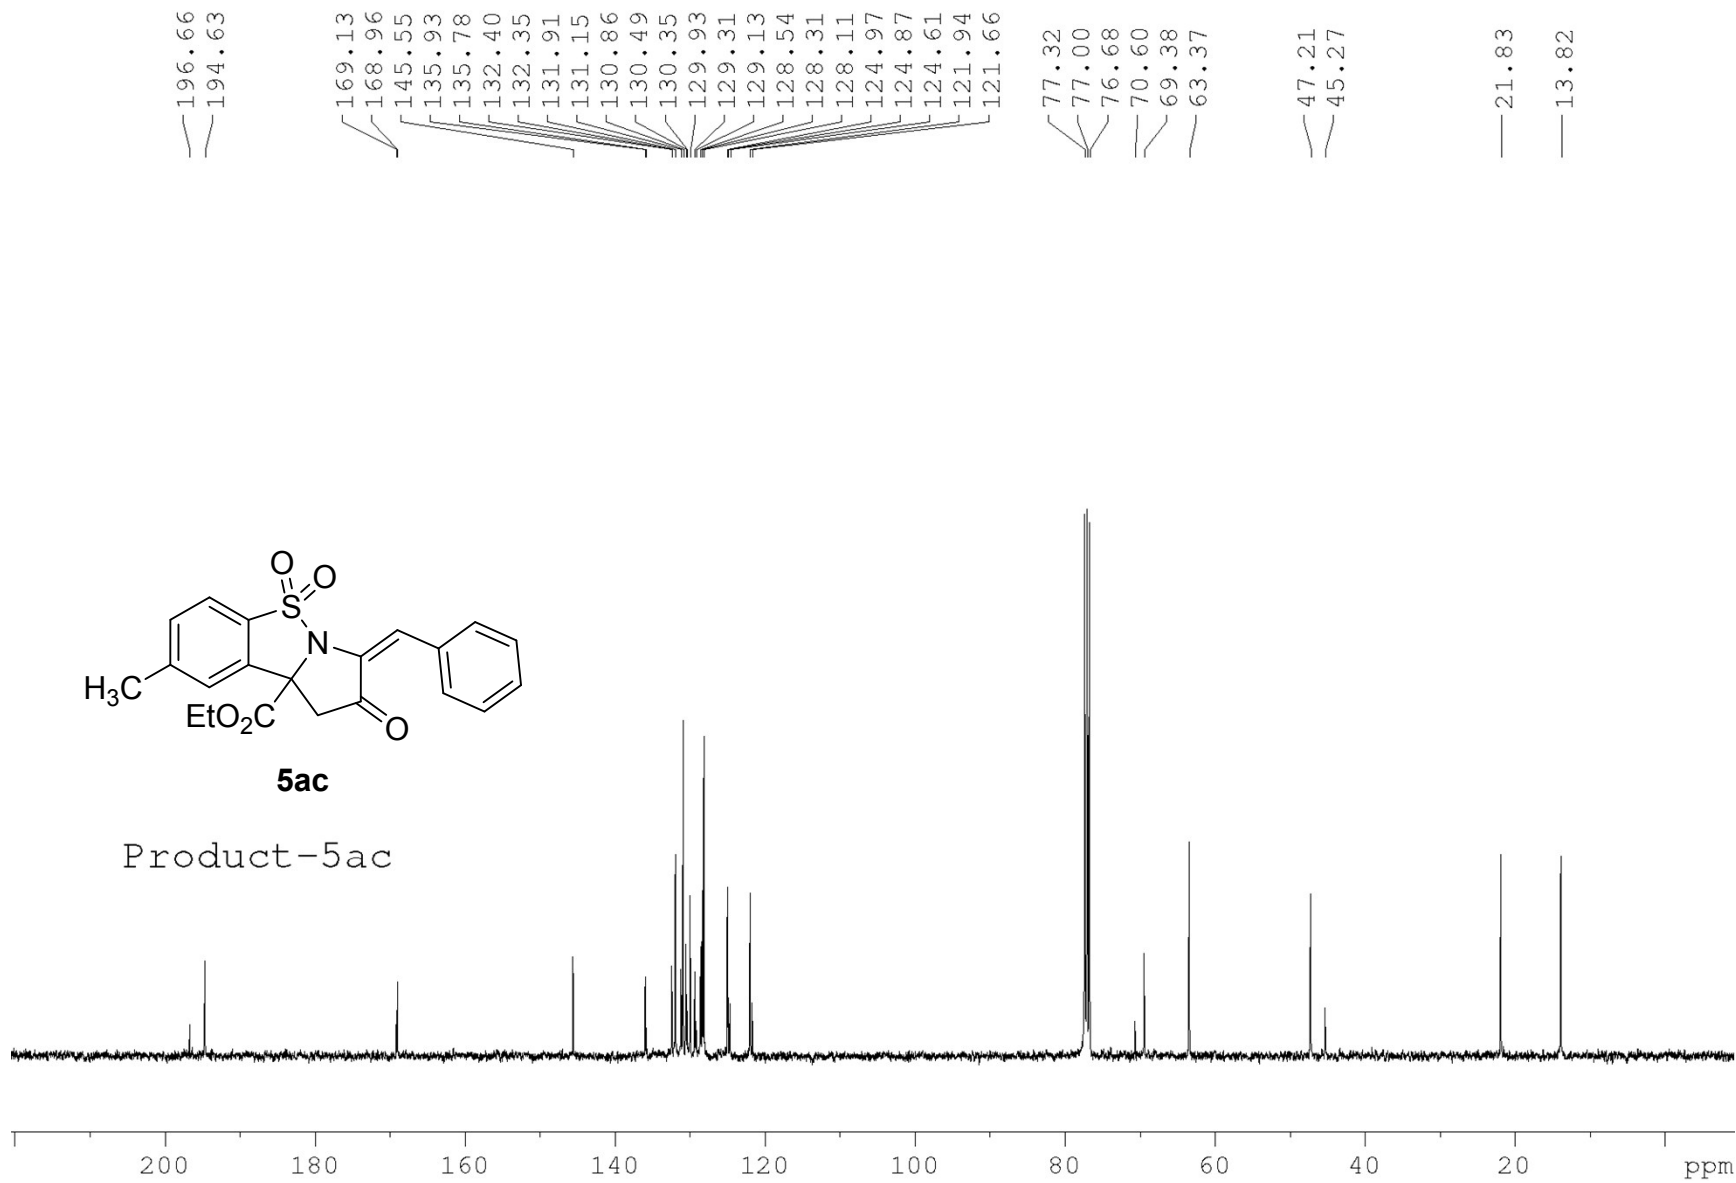

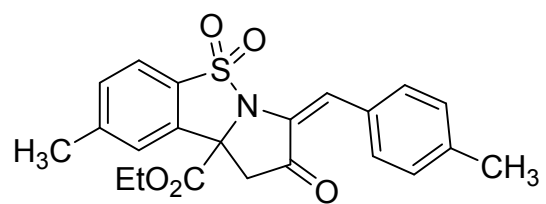

**5bc**

Product-5bc

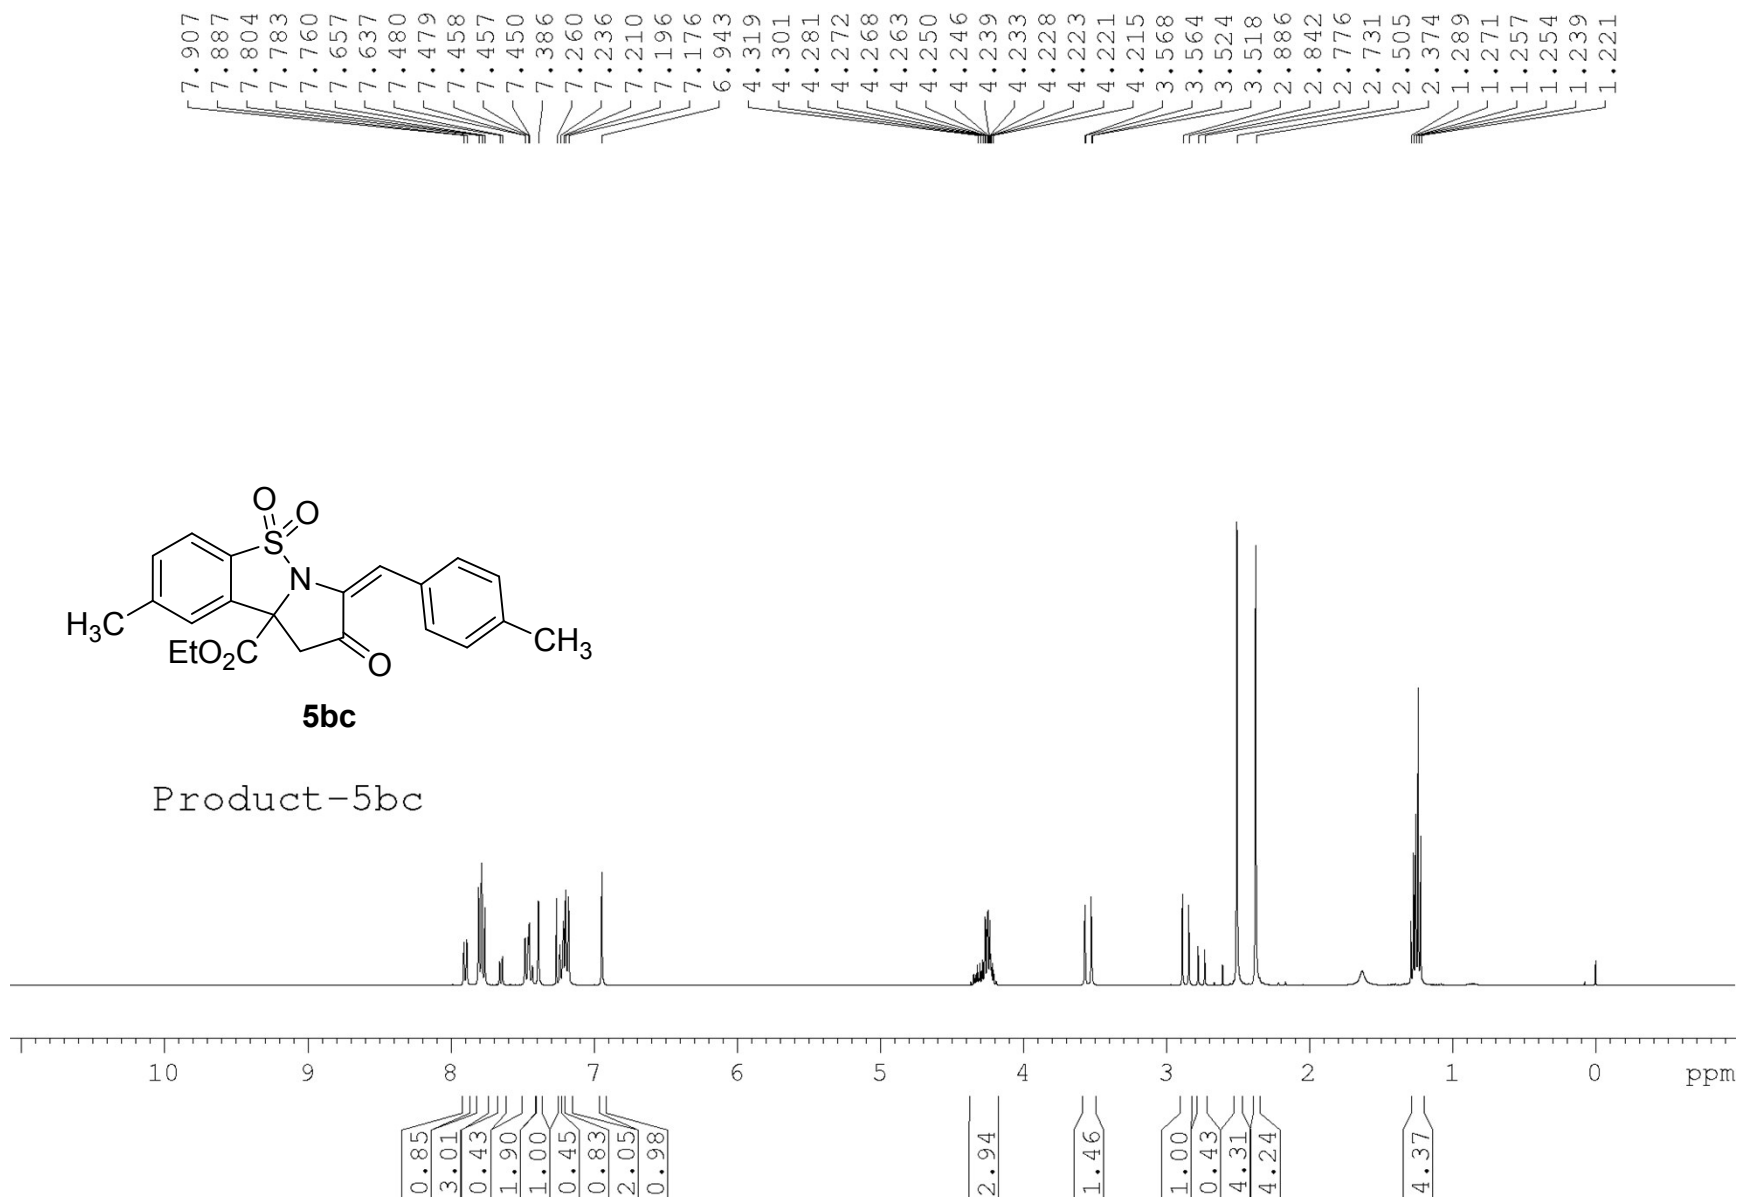

196.71  
194.64

169.22  
169.07  
145.58  
145.51  
141.04  
140.63  
135.99  
135.87  
131.88  
131.19  
131.07  
130.66  
129.75  
129.44  
129.37  
129.11  
128.91  
128.67  
128.43  
125.31  
124.94  
124.85  
122.00  
121.72

77.32  
77.00  
76.68  
70.69  
69.49  
63.36

47.28  
45.31

21.87  
21.67  
21.56  
13.85

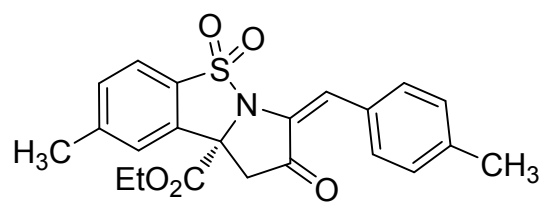

**5bc**

Product-5bc

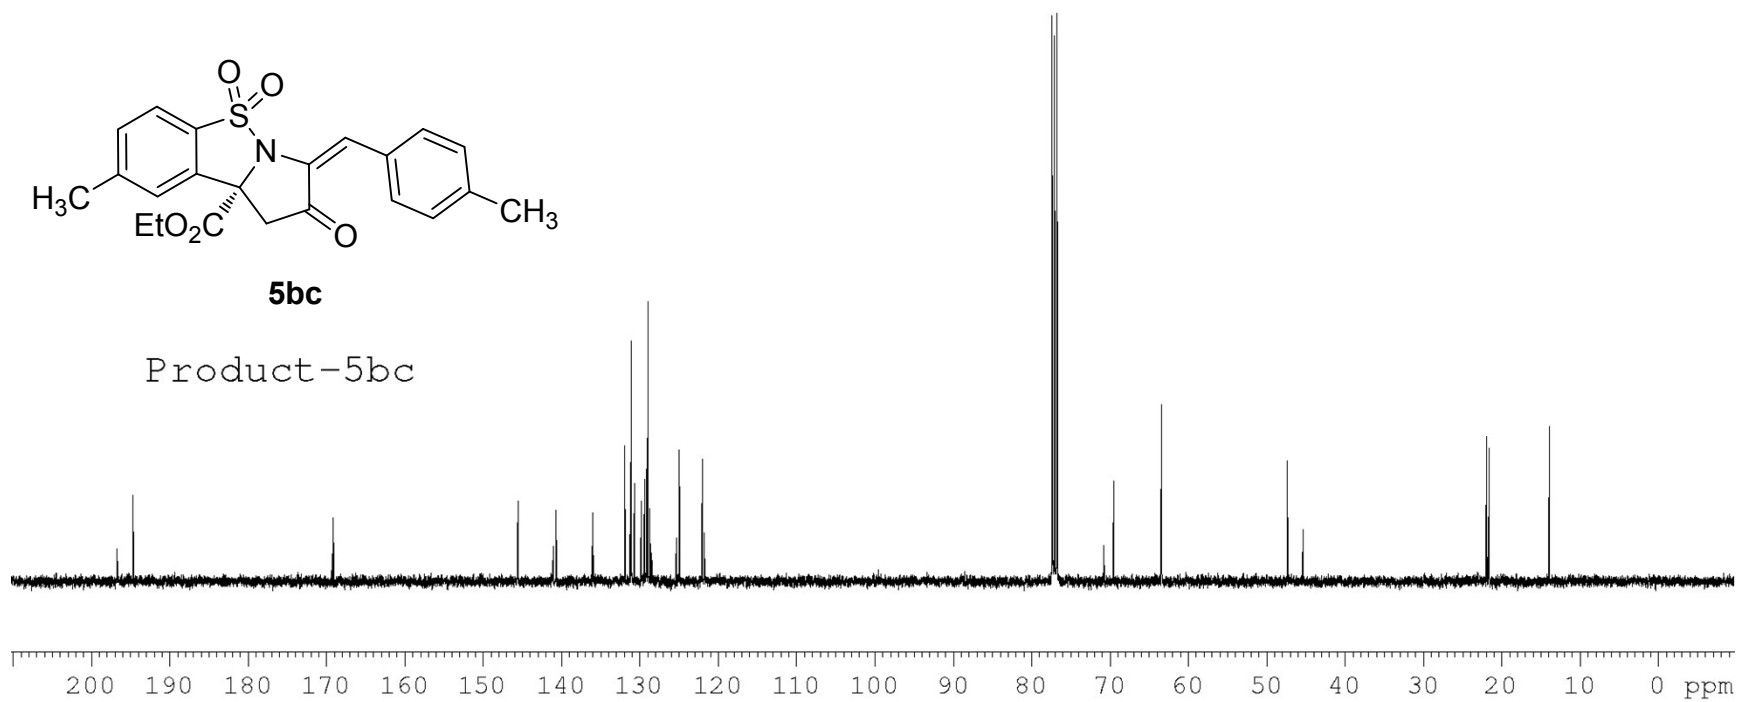

8.005  
7.992  
7.984  
7.970  
7.907  
7.893  
7.886  
7.872  
7.784  
7.764  
7.664  
7.644  
7.488  
7.466  
7.461  
7.440  
7.387  
7.260  
7.168  
7.119  
7.097  
7.074  
7.052  
7.030  
6.903  
4.322  
4.304  
4.293  
4.285  
4.274  
4.267  
4.256  
4.249  
4.238  
4.221  
4.212  
3.581  
3.569  
3.537  
3.523  
2.890  
2.846  
2.785  
2.739  
2.509  
1.291  
1.273  
1.260  
1.242  
1.225

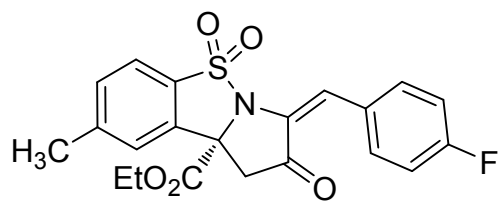

**5cc**

Product-5cc

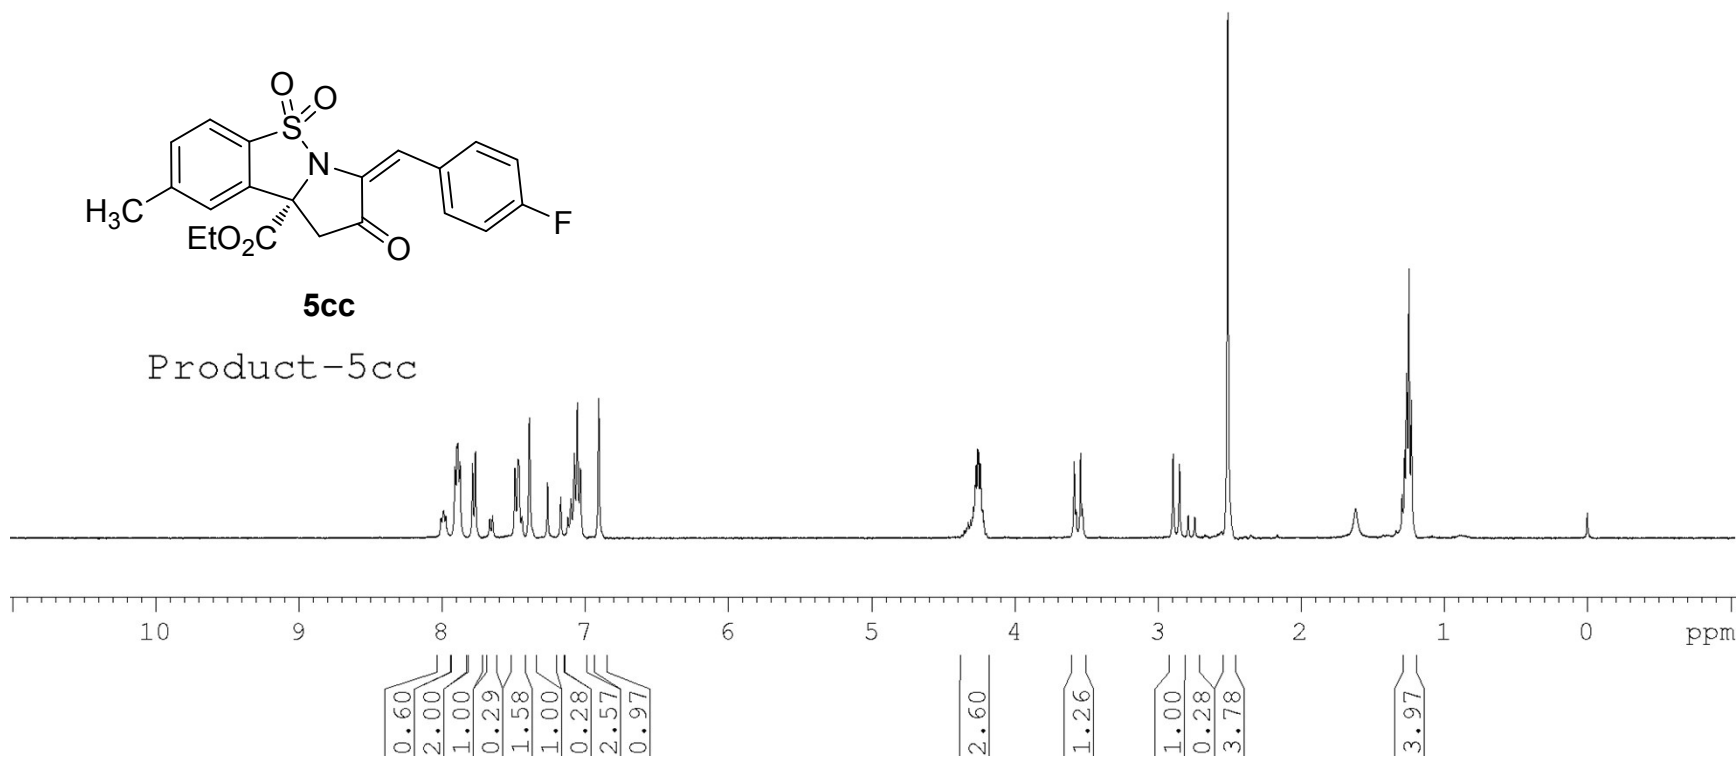

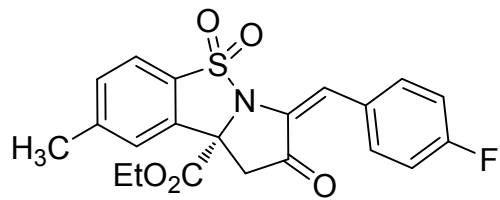

**5cc**

Product-5cc

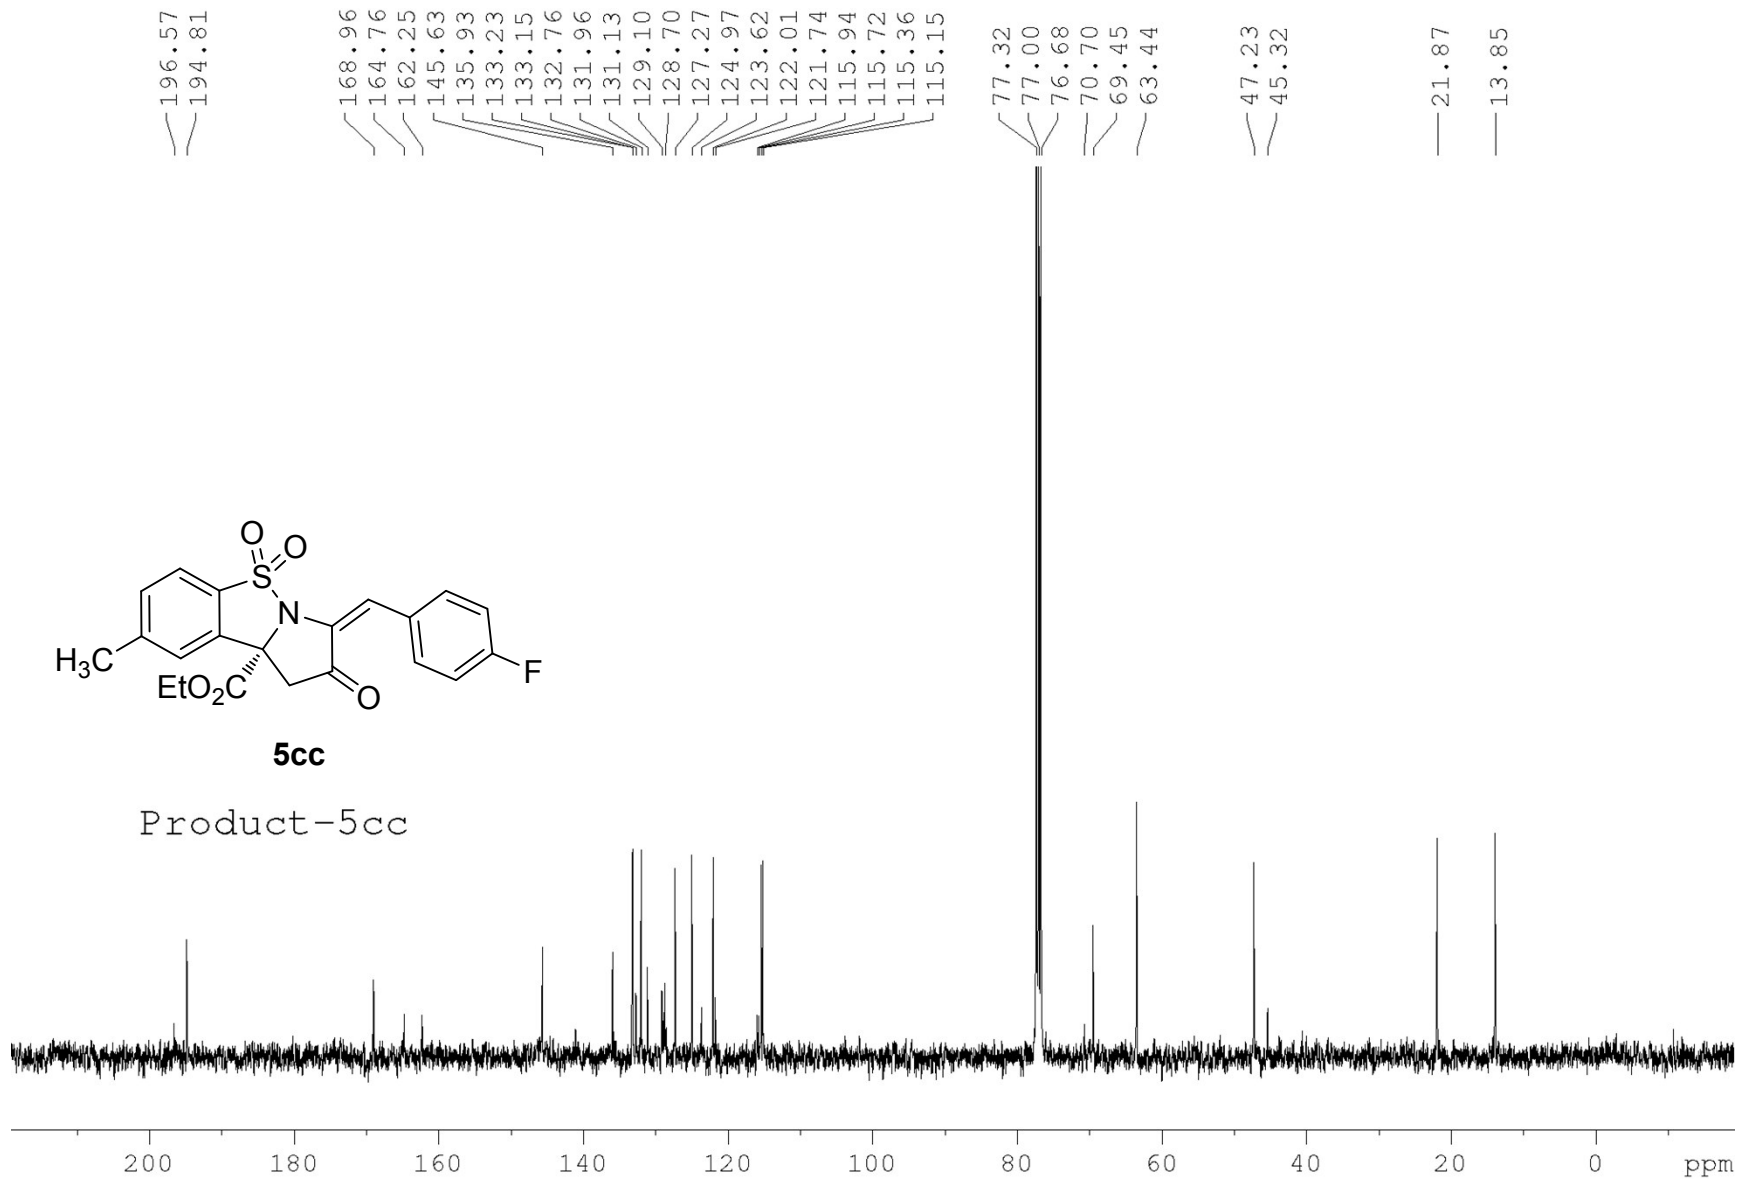

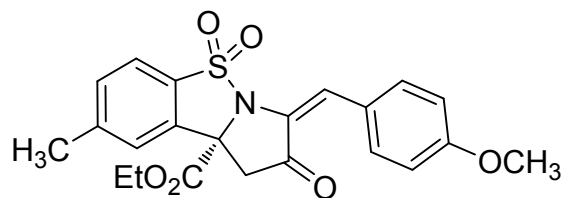

**5dc**

Product-5dc

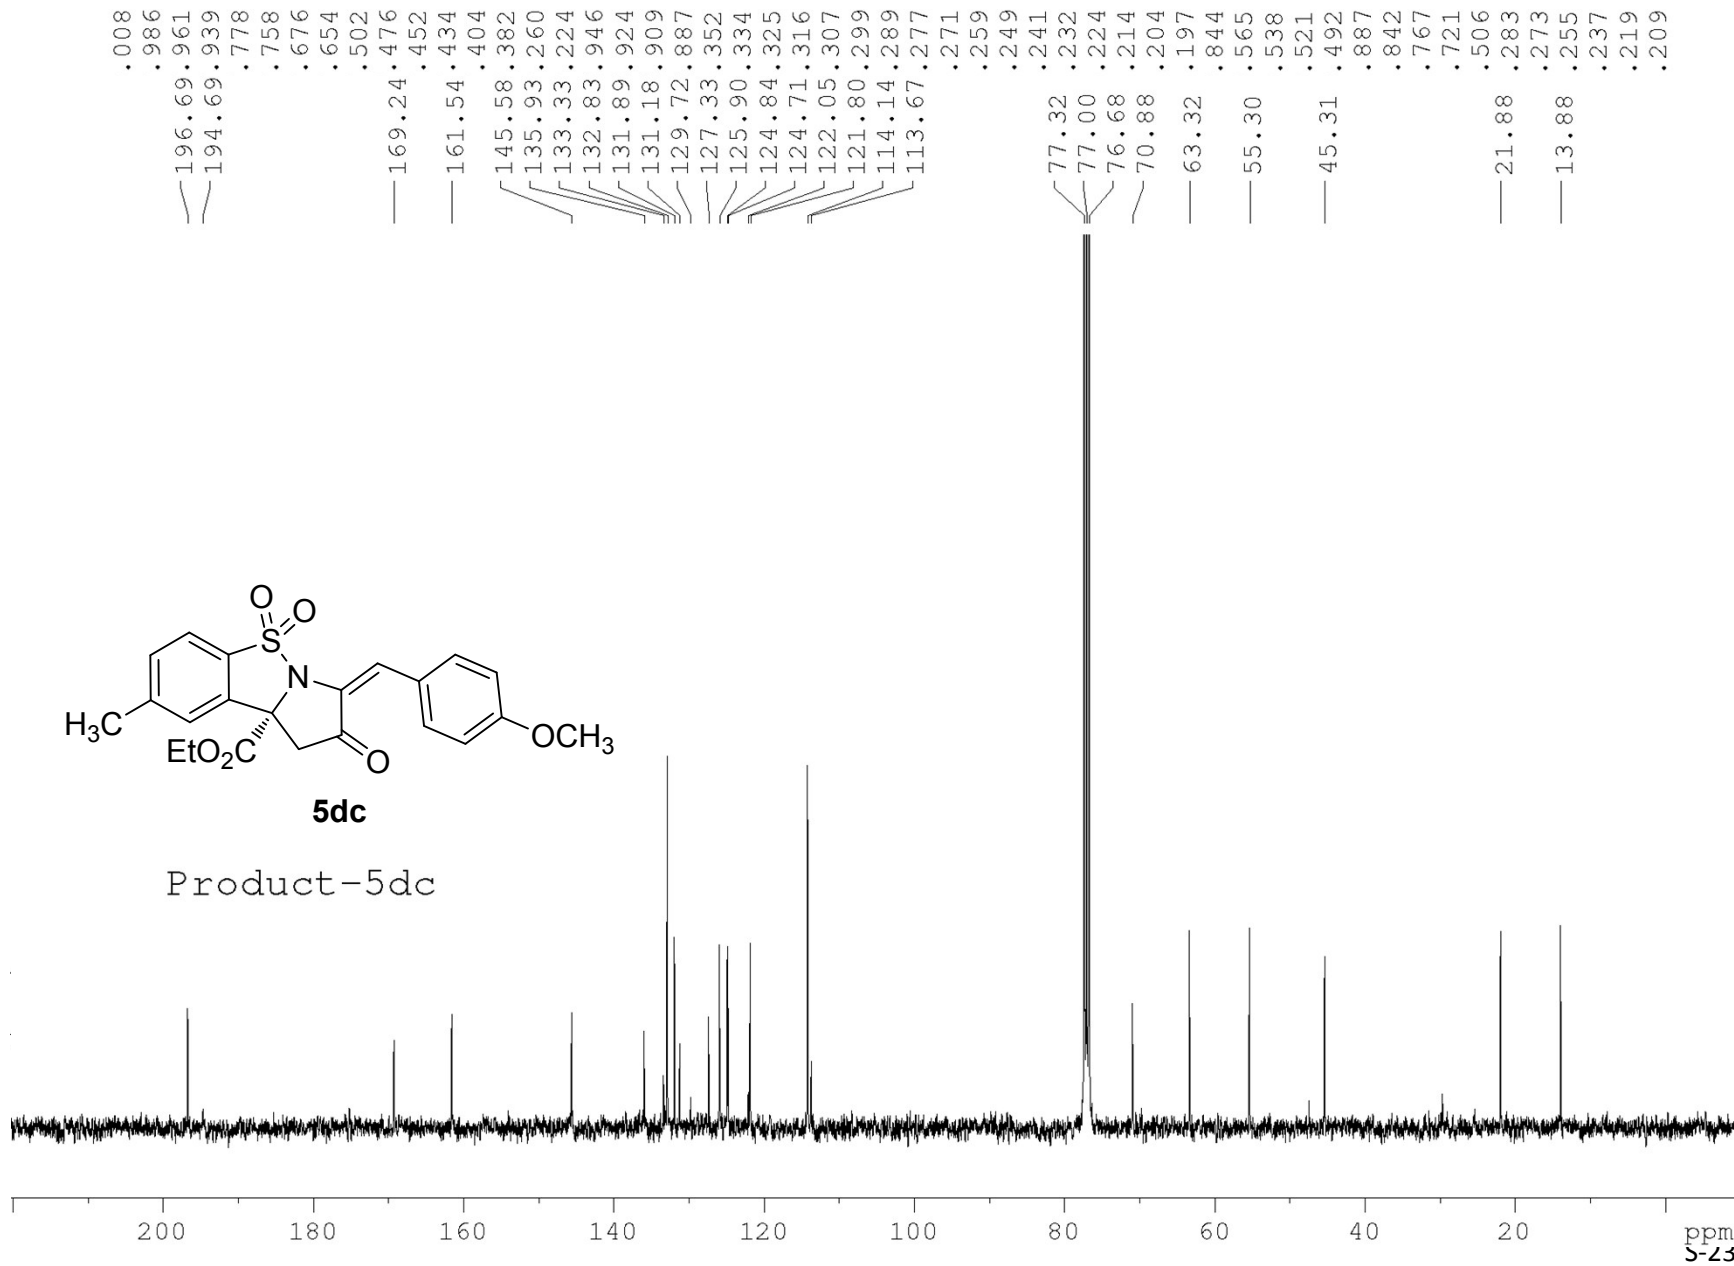

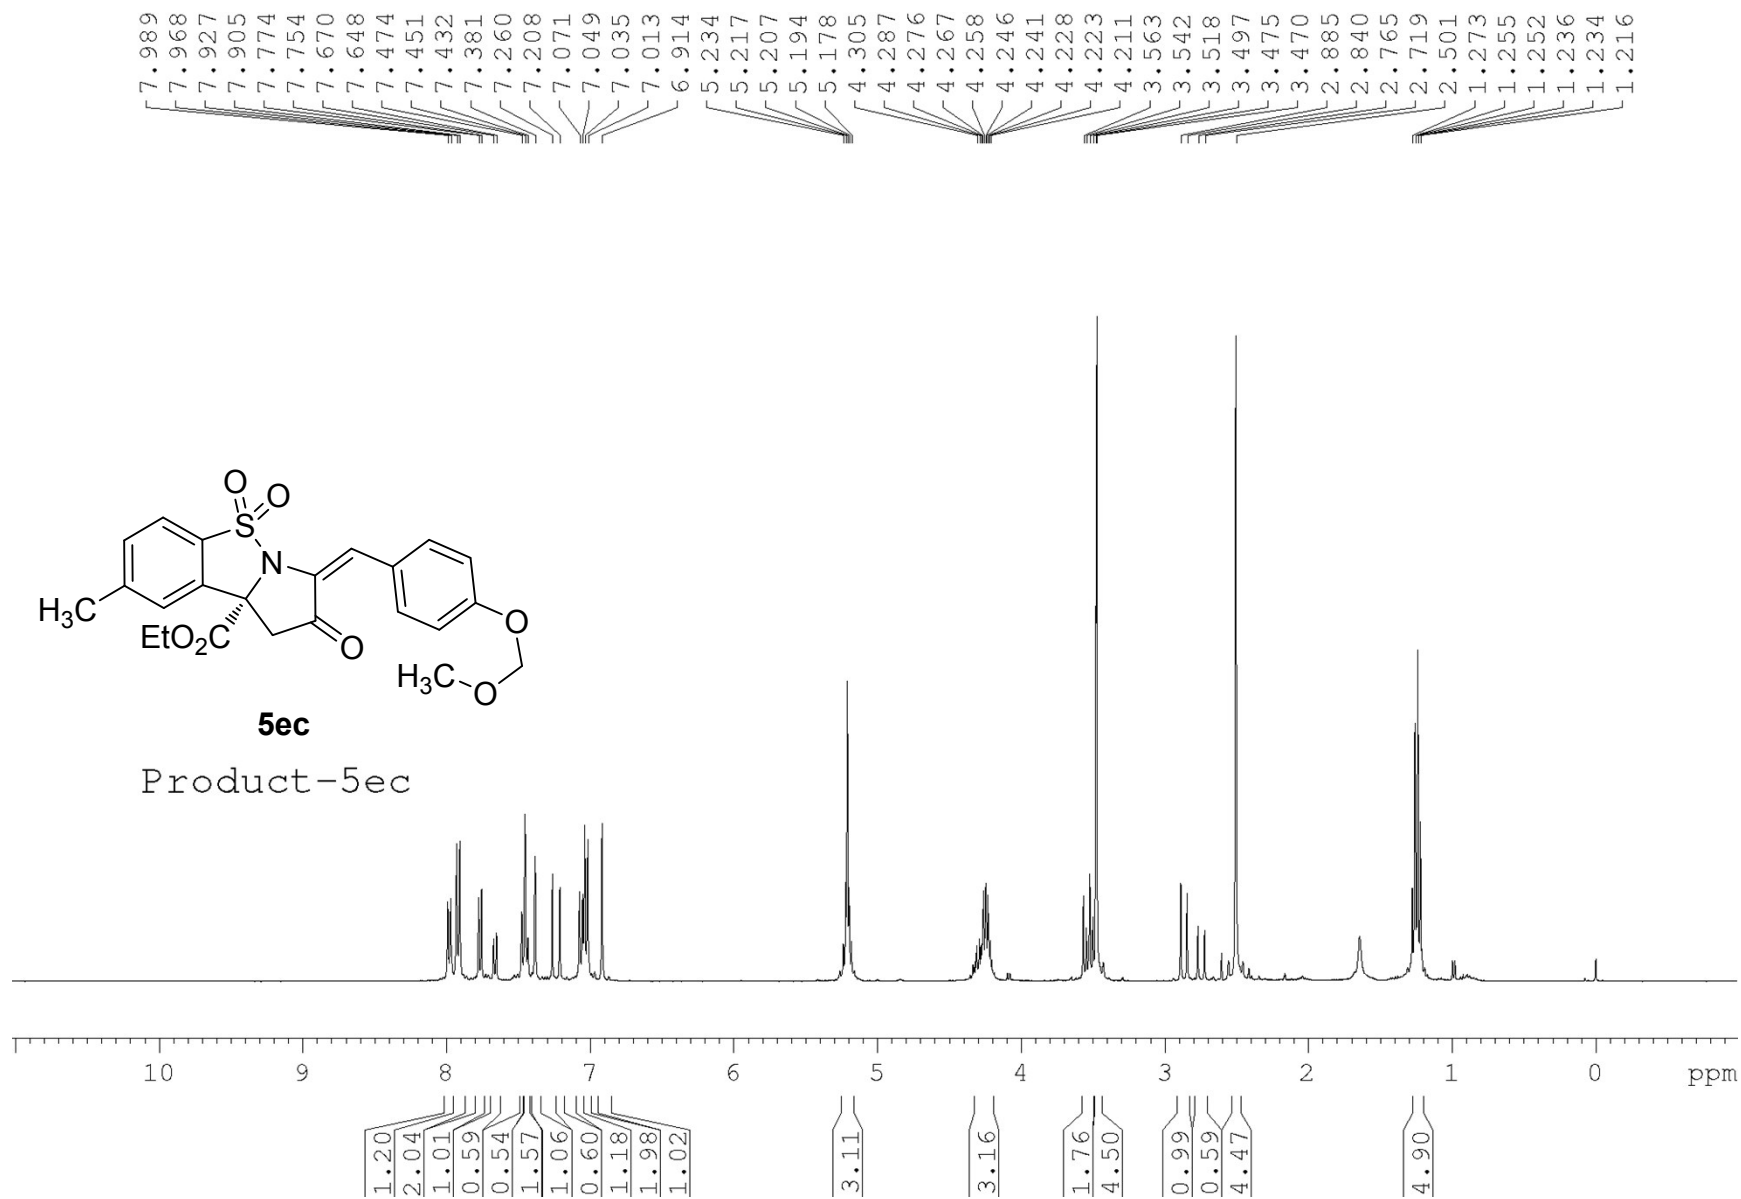



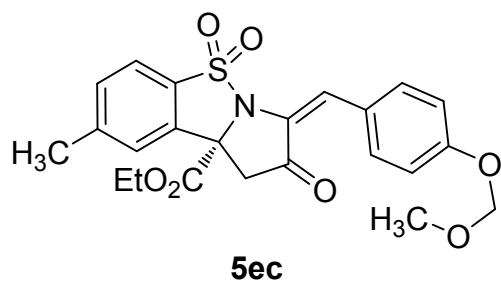

Product-5ec

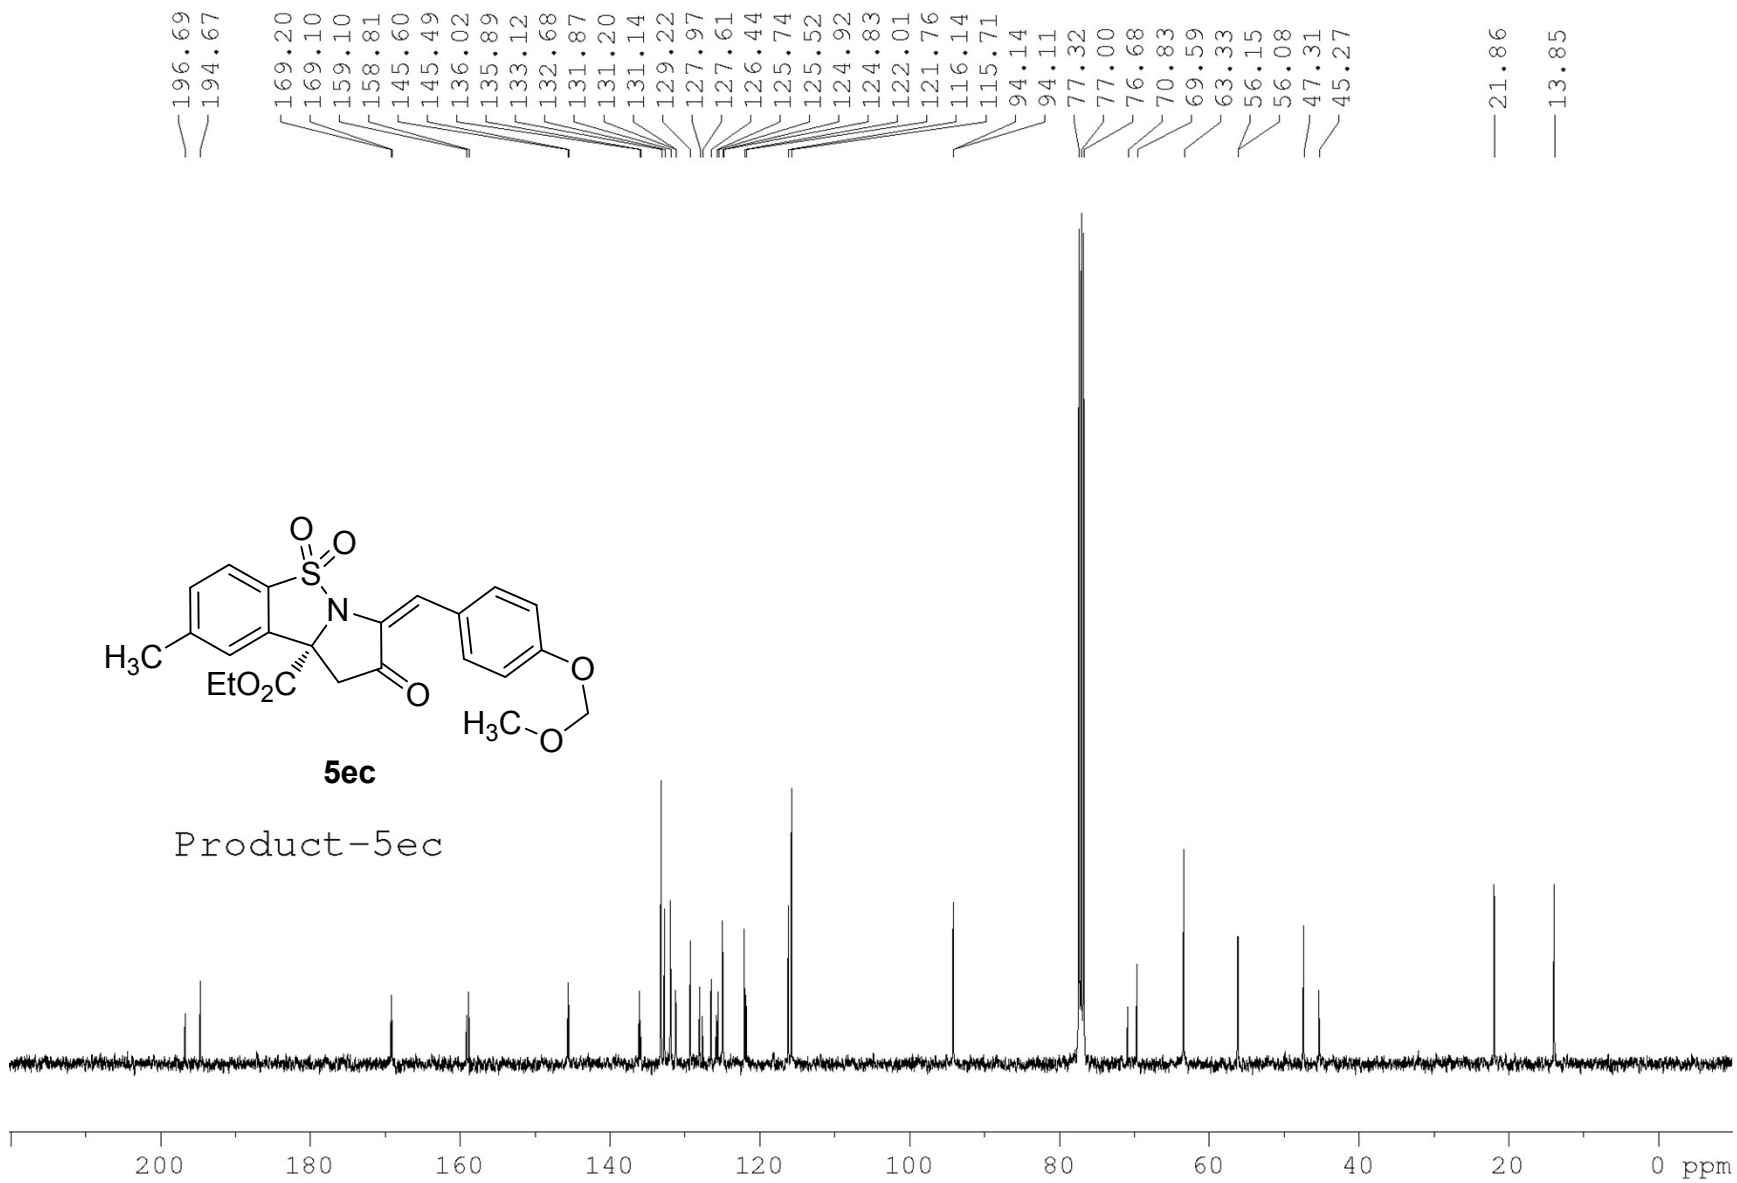

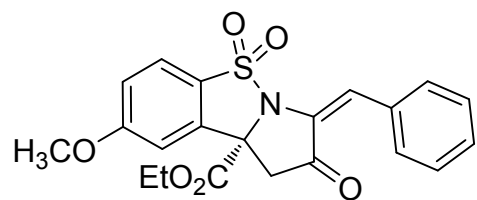

**5ad**

Product-5ad

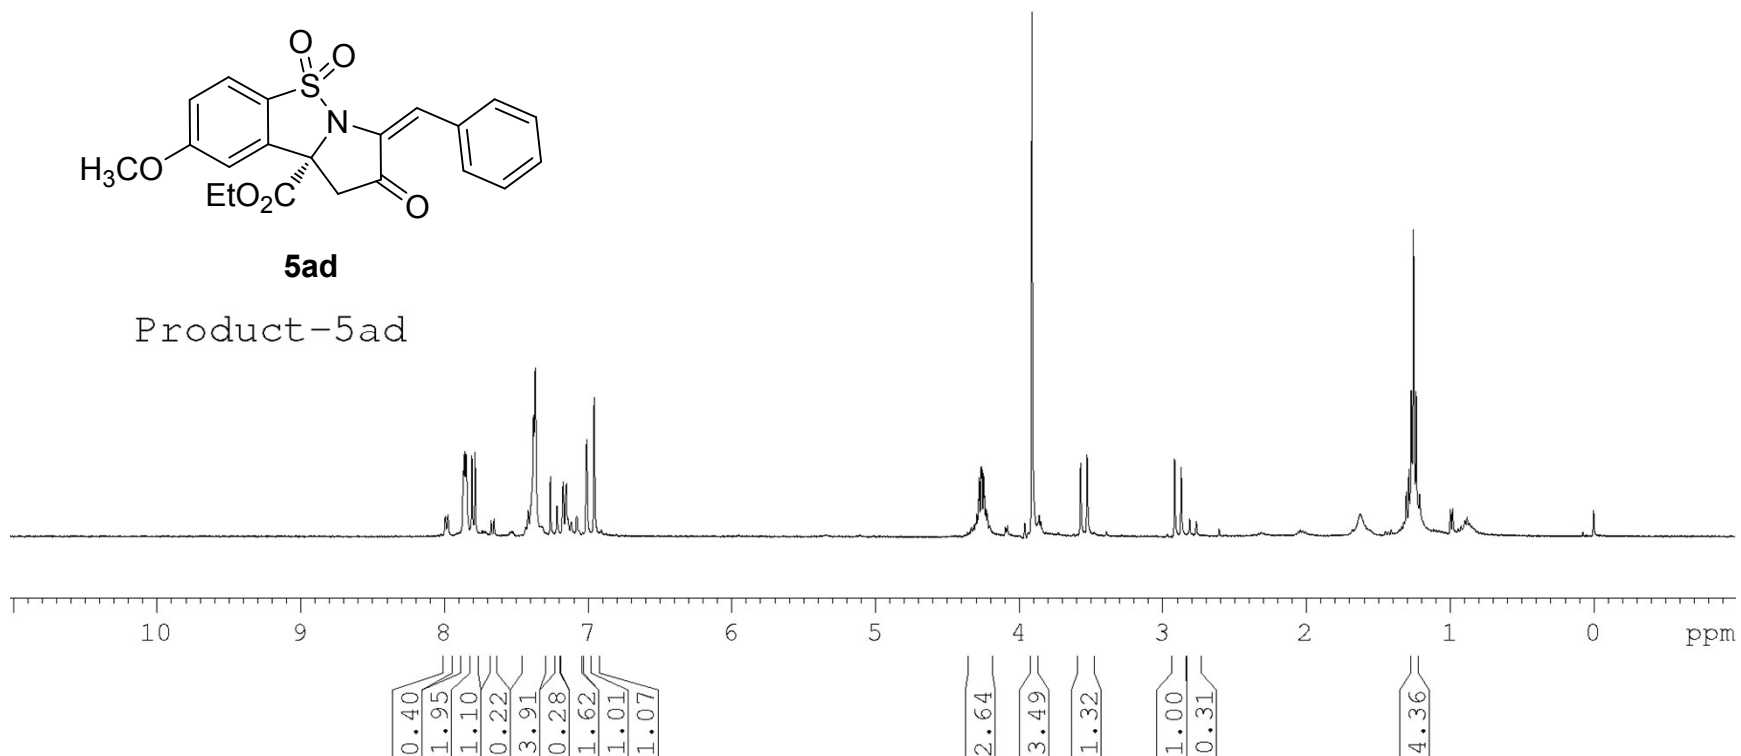

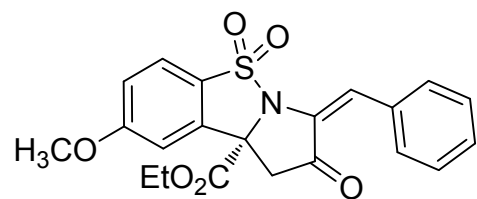

**5ad**

Product-5ad

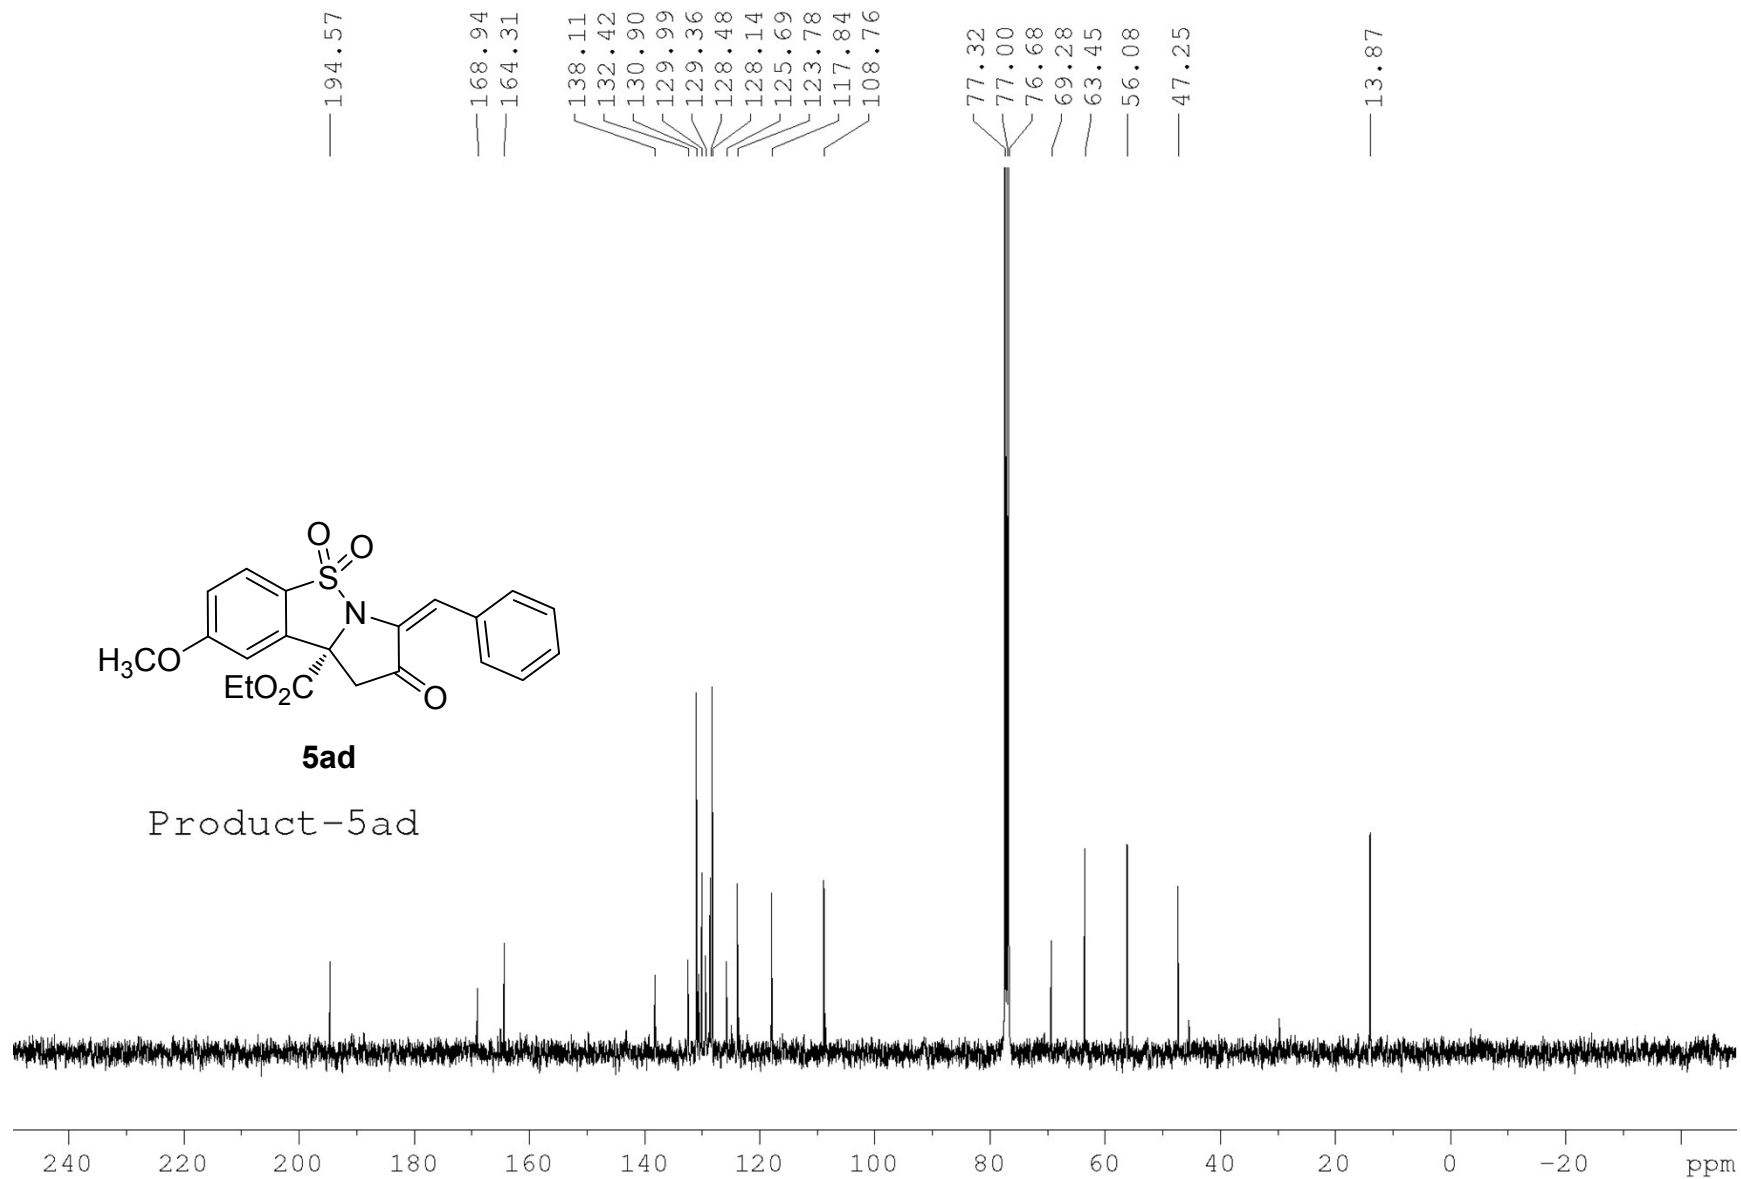

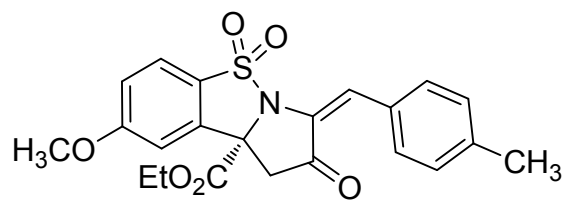

**5bd**

Product-5bd

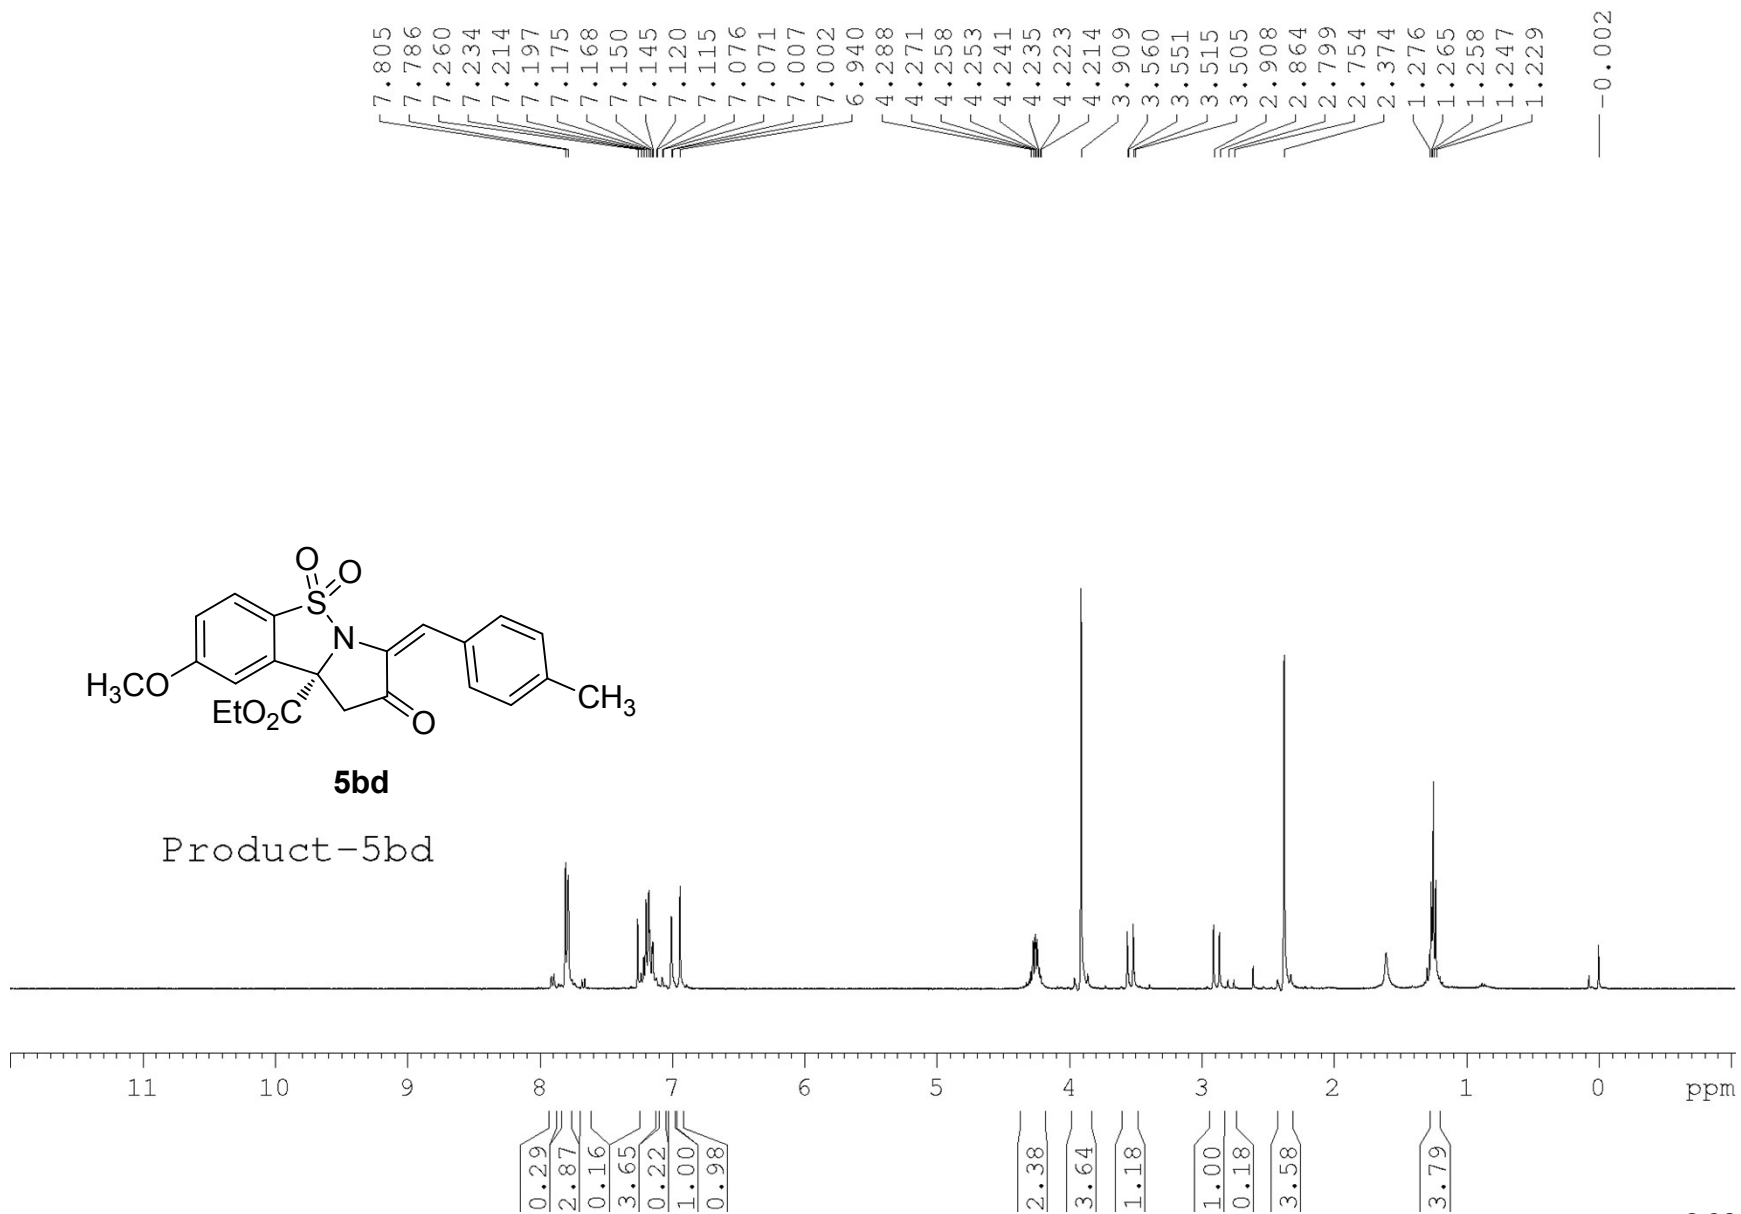

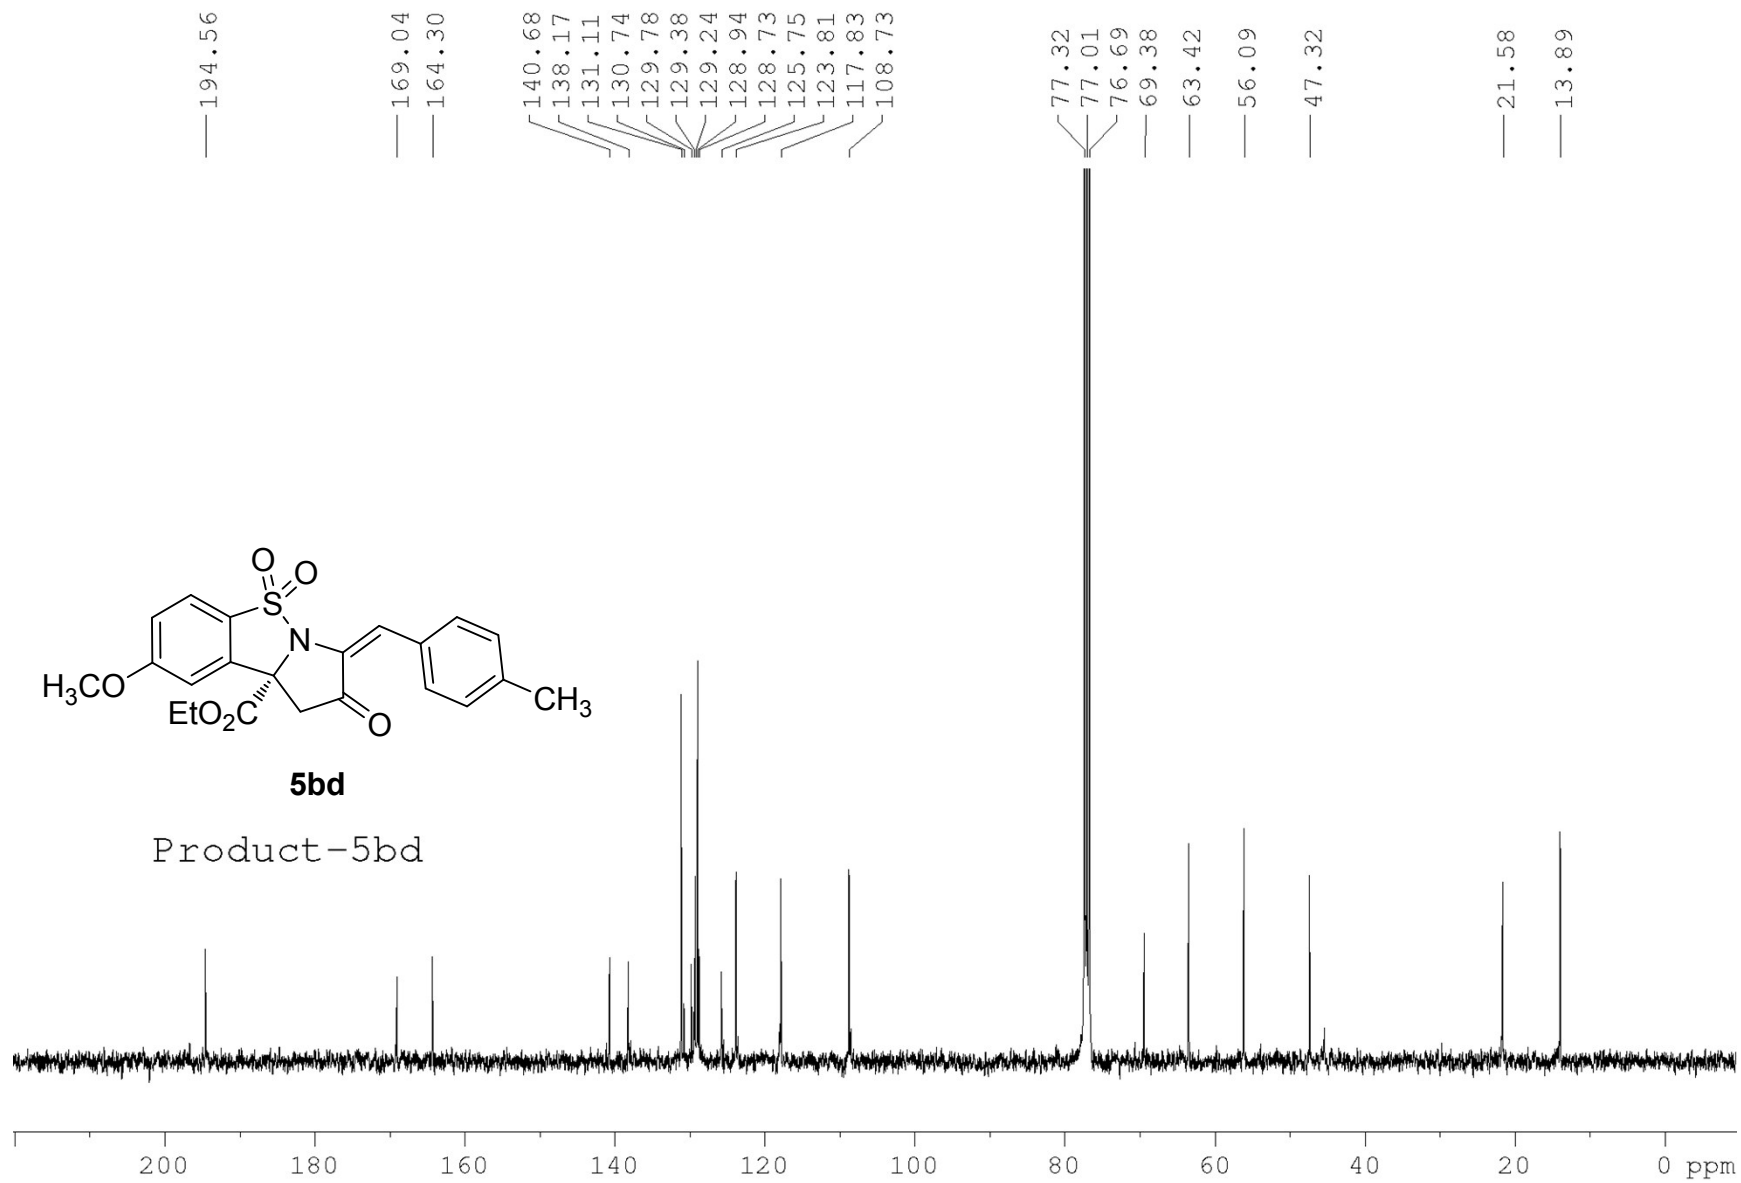

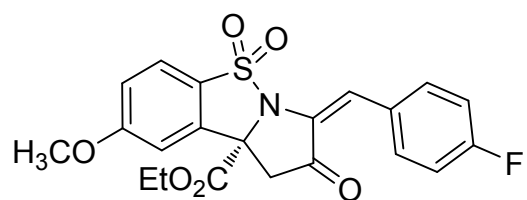

**5cd**

Product-5cd

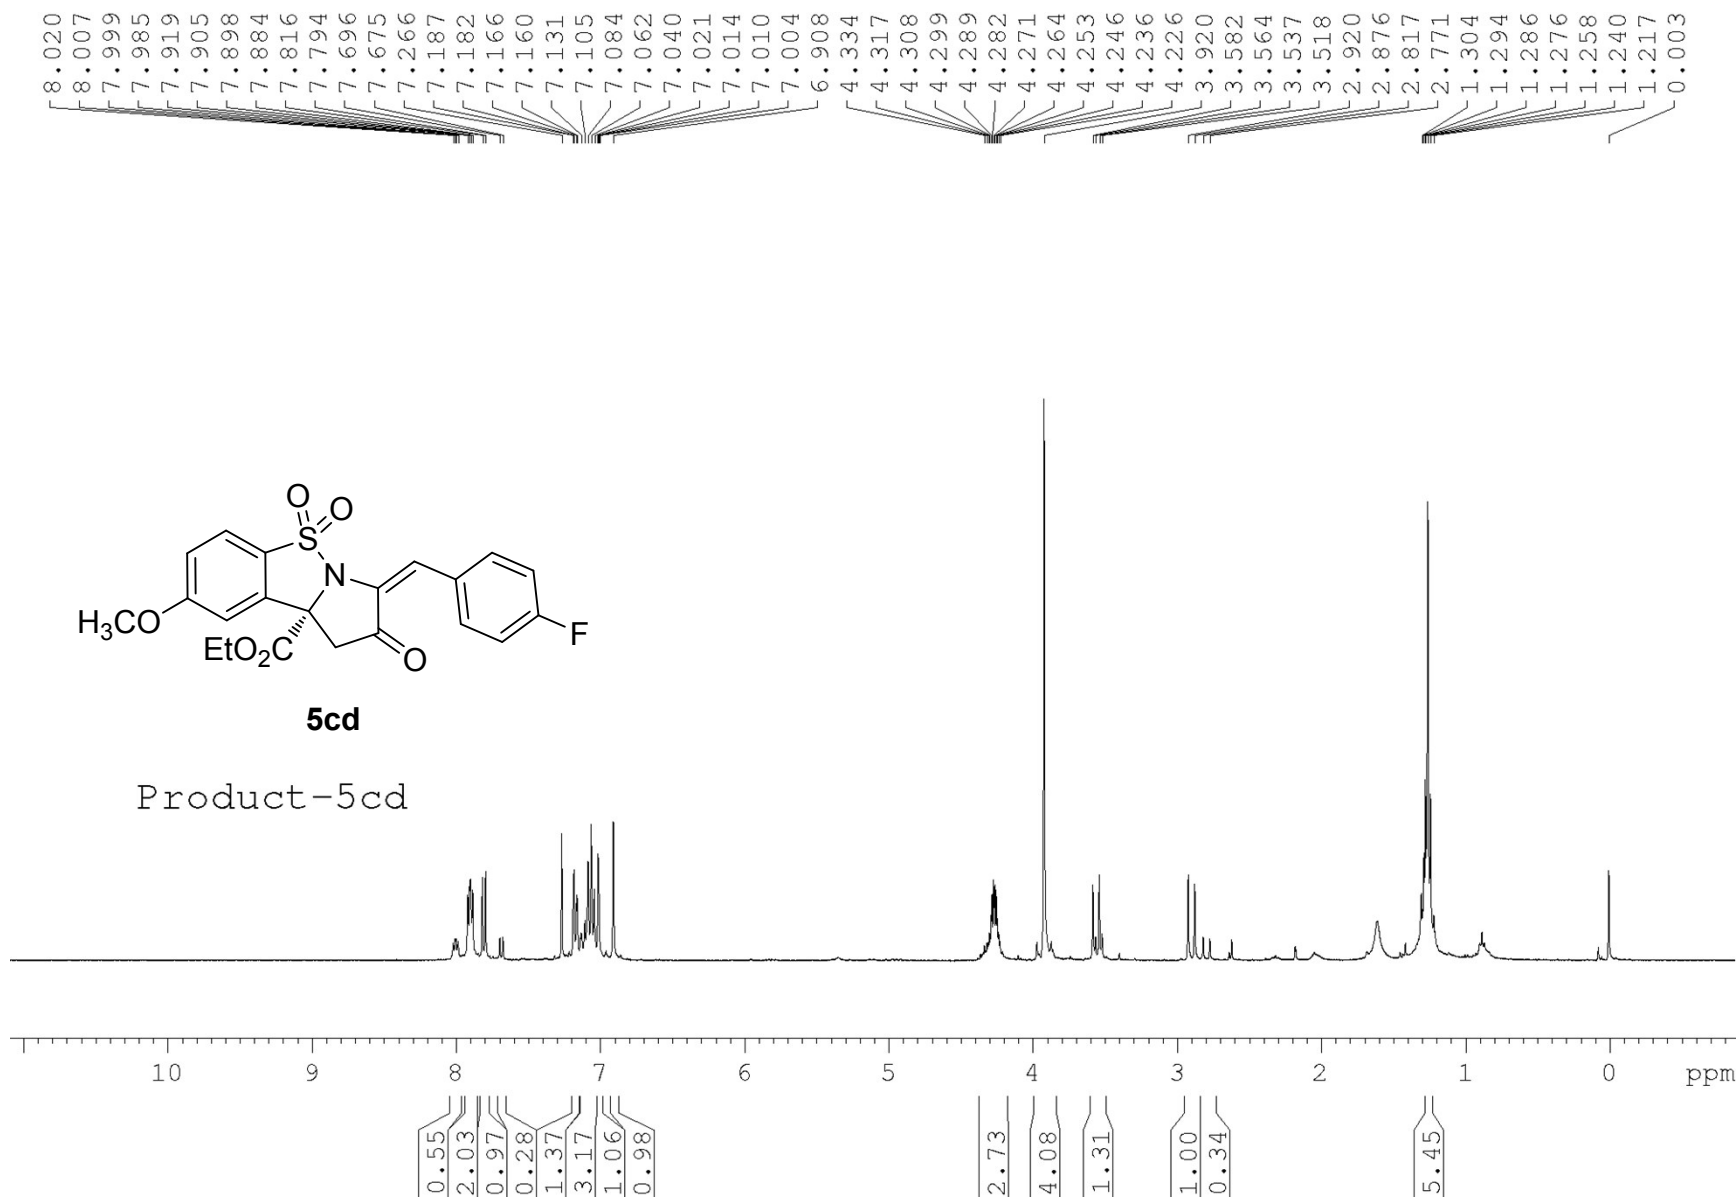

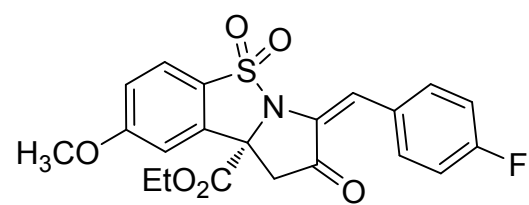

**5cd**

Product-5cd

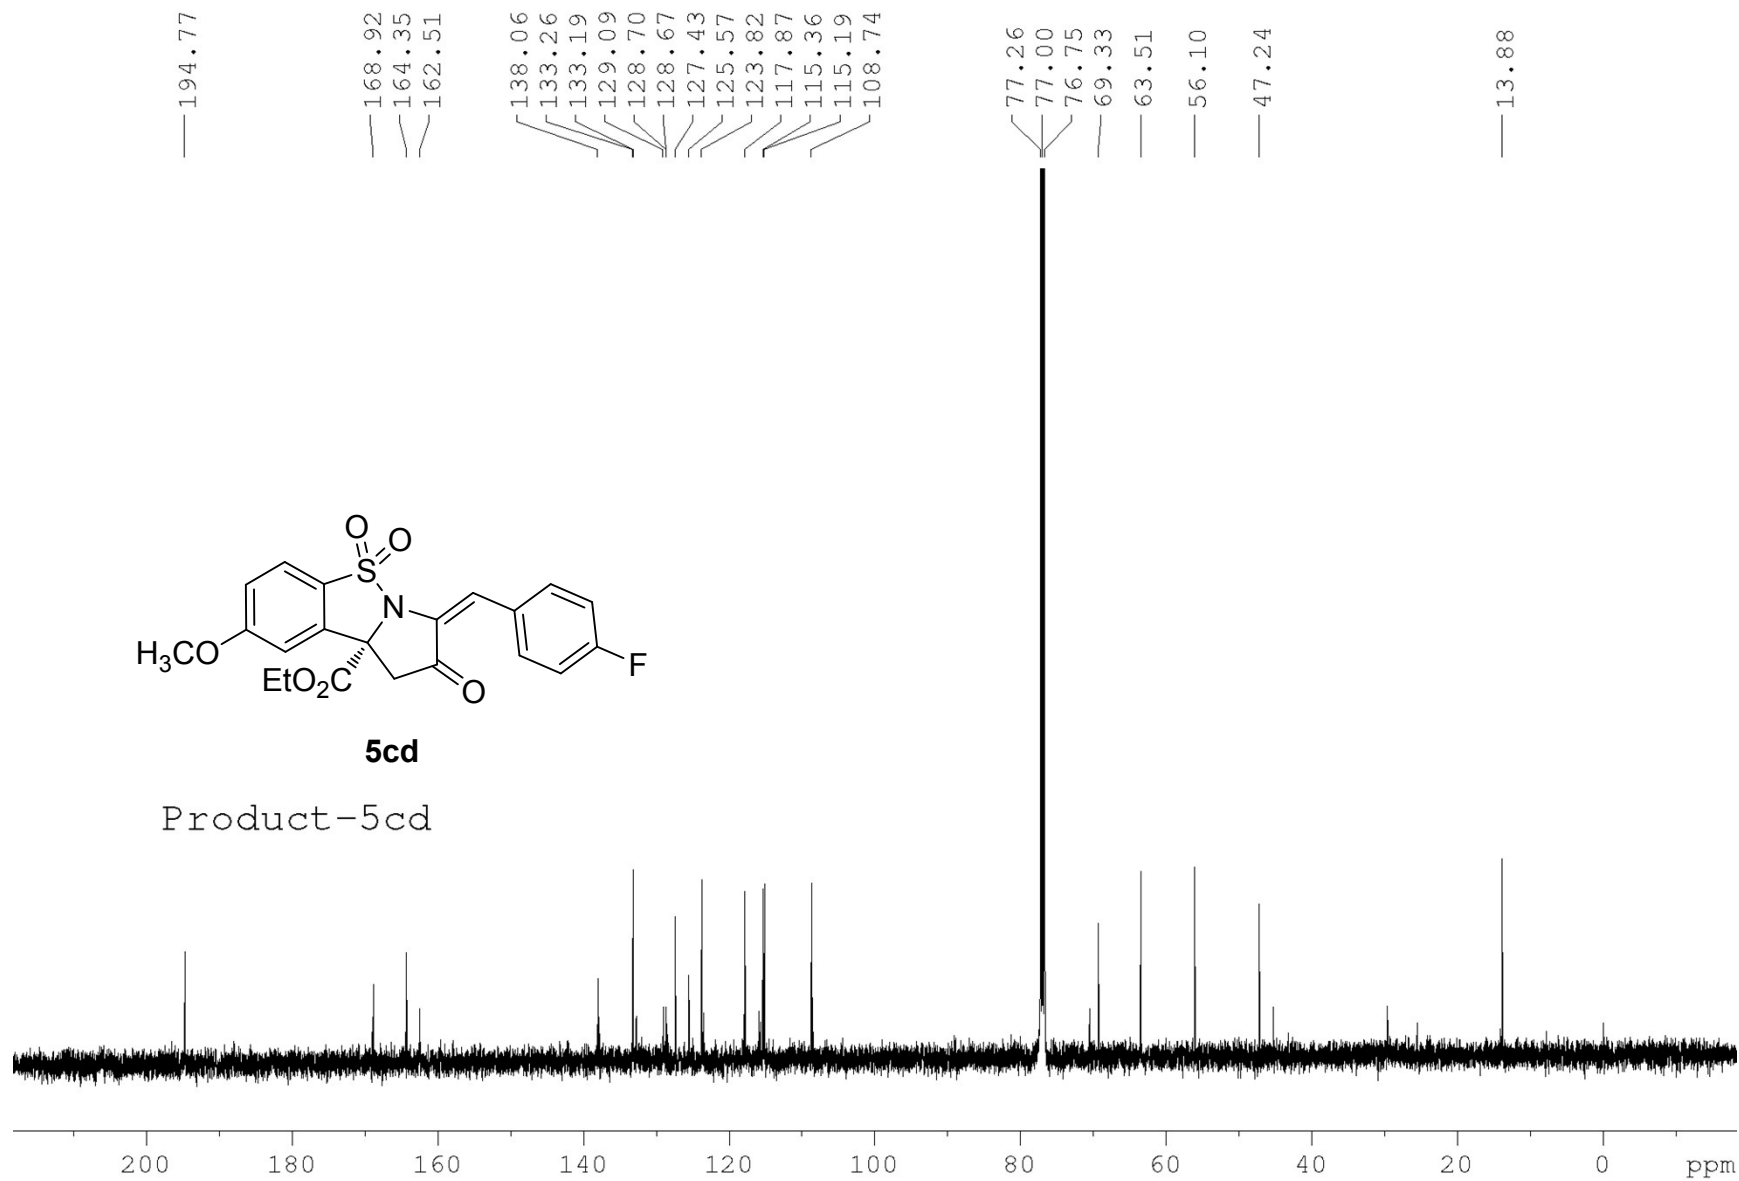

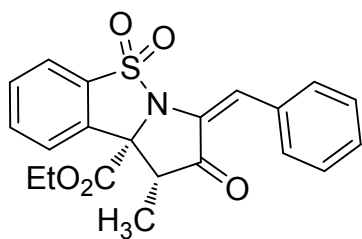

**5fa**

Product-5fa

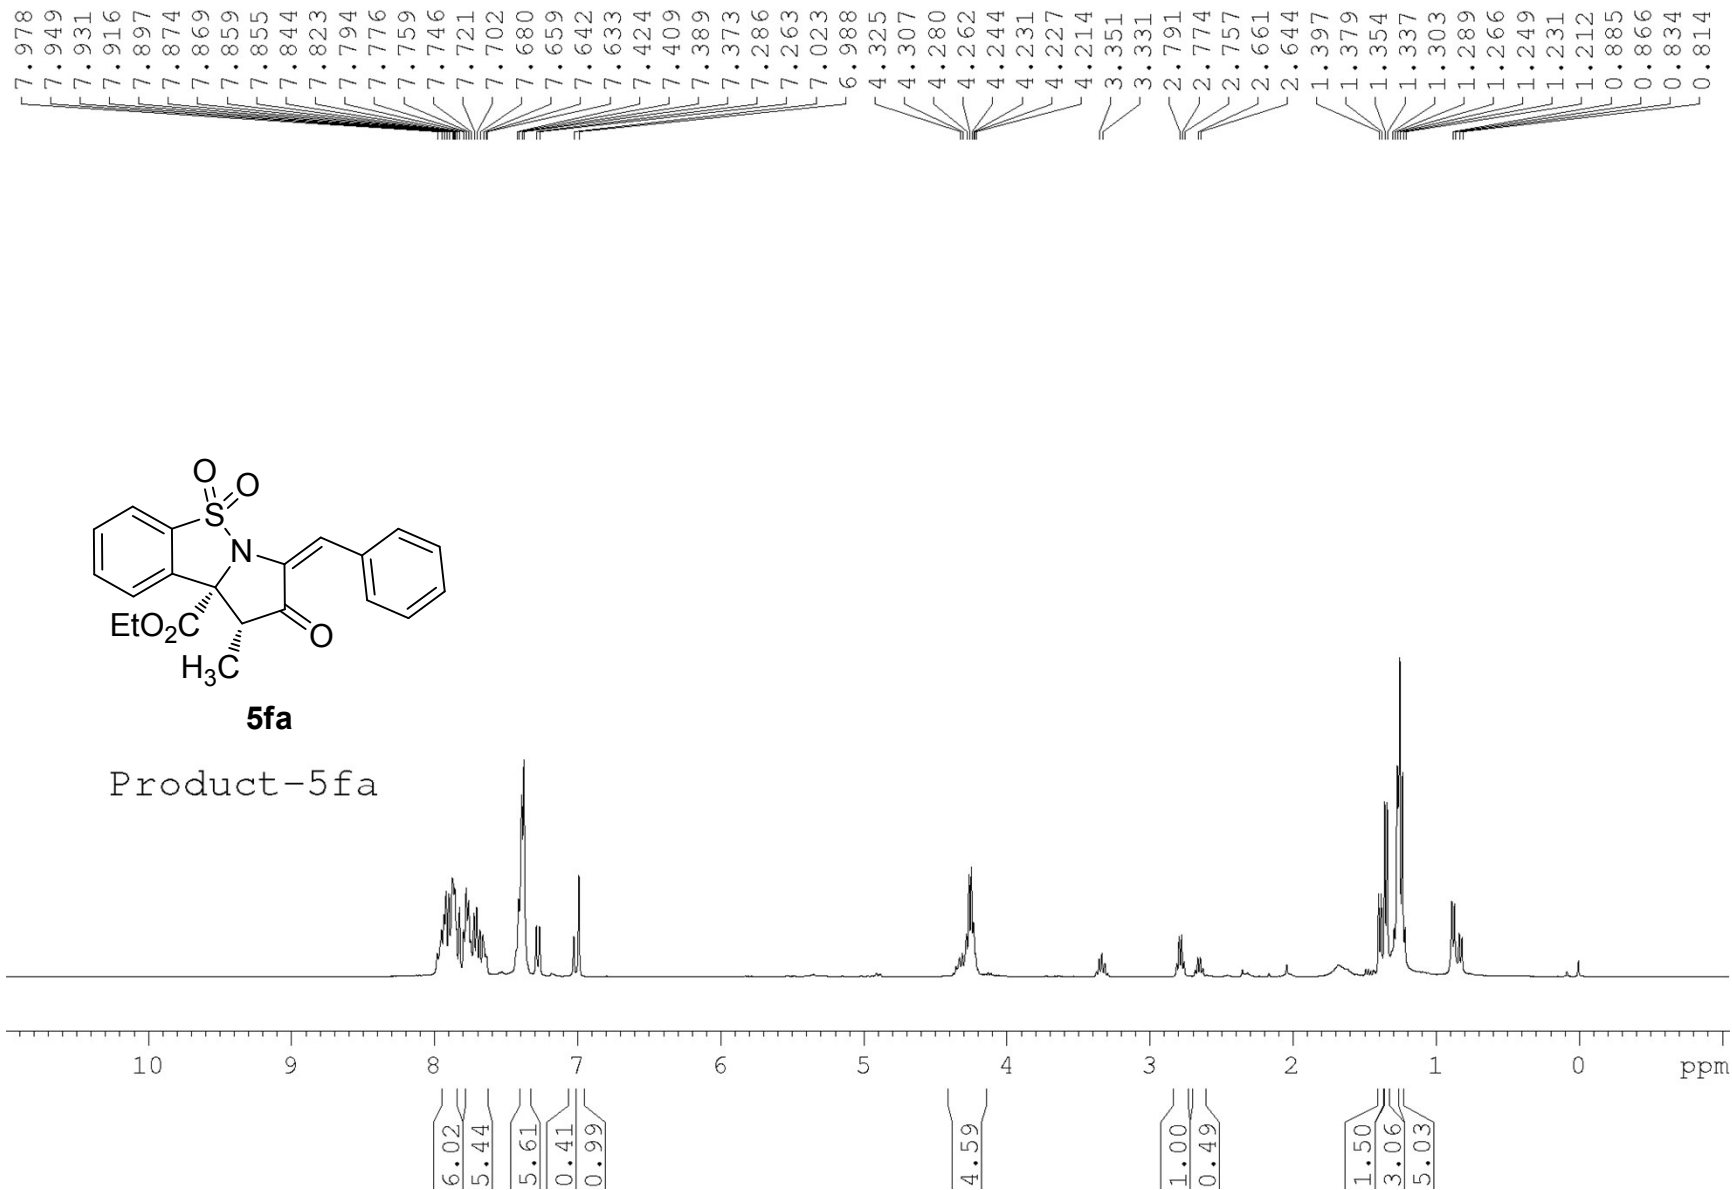



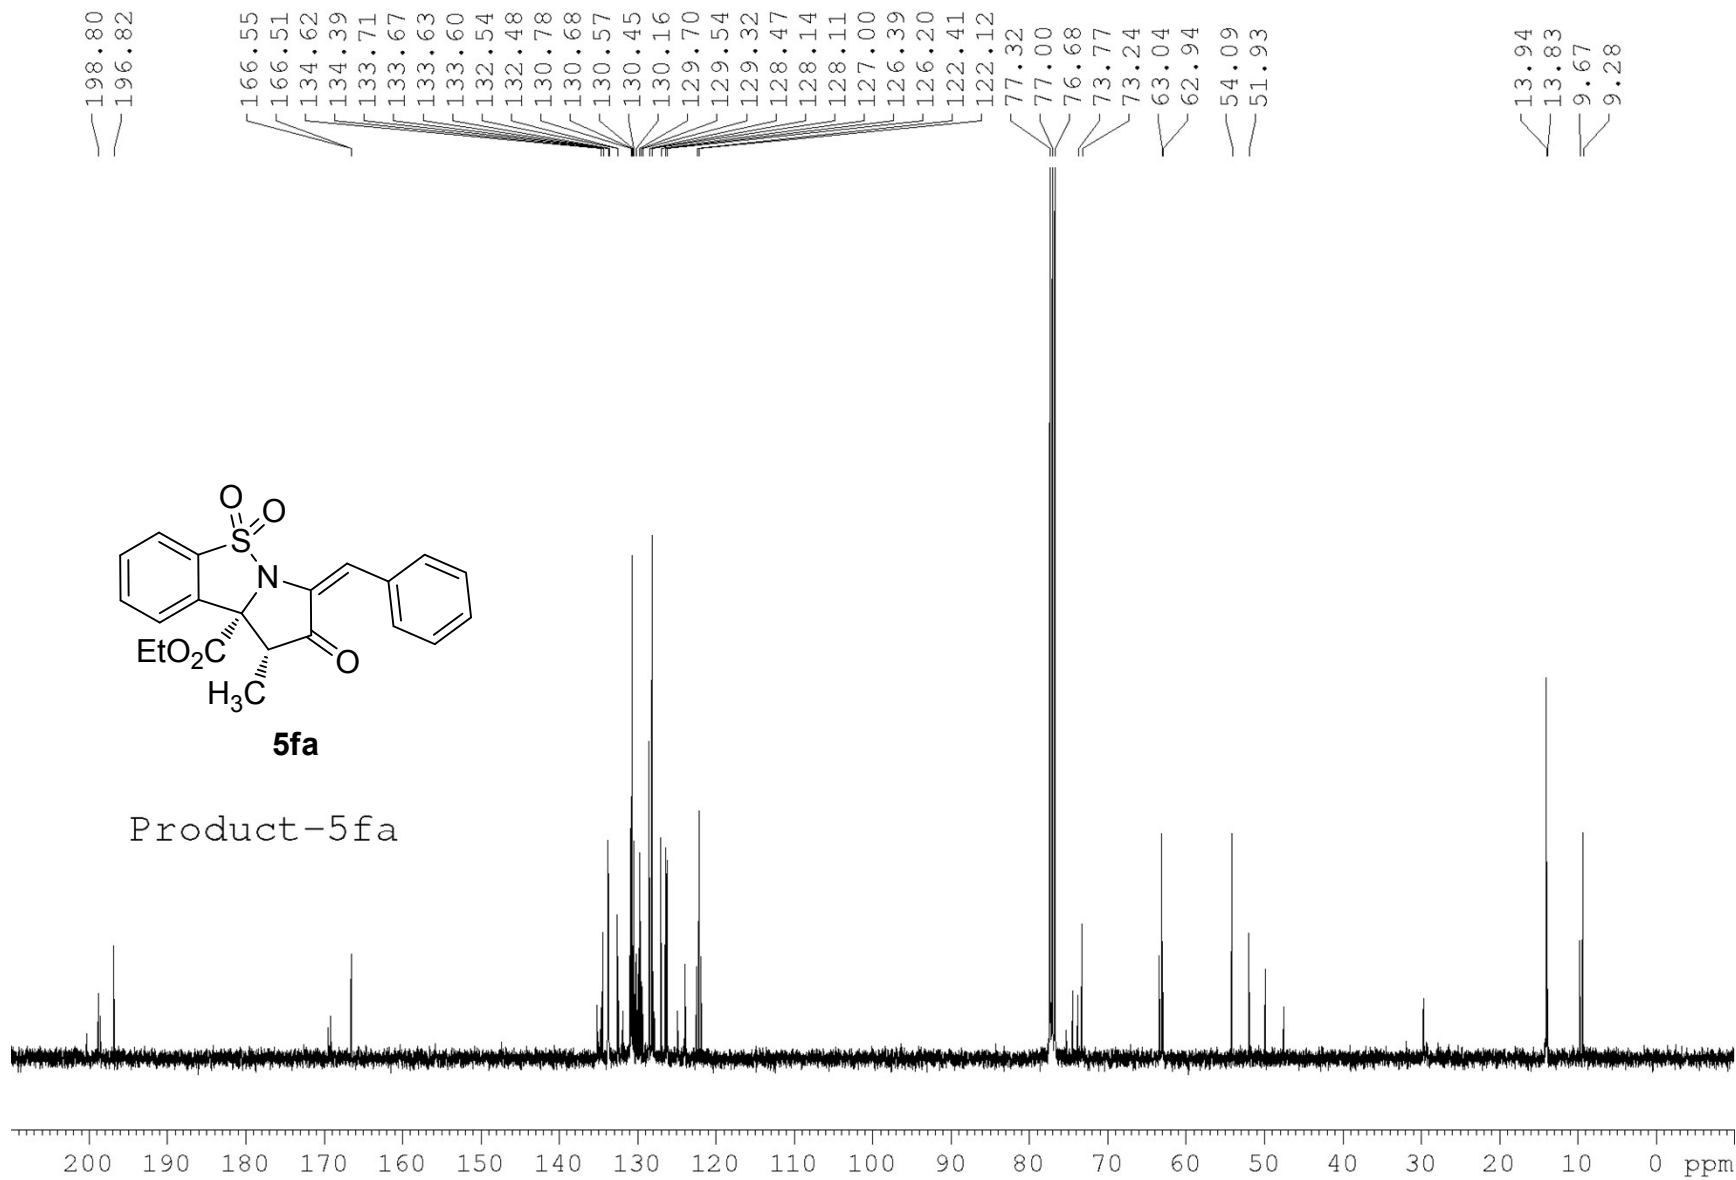

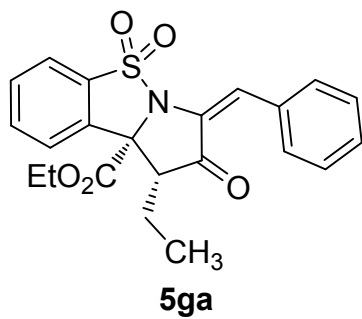

Product-5ga

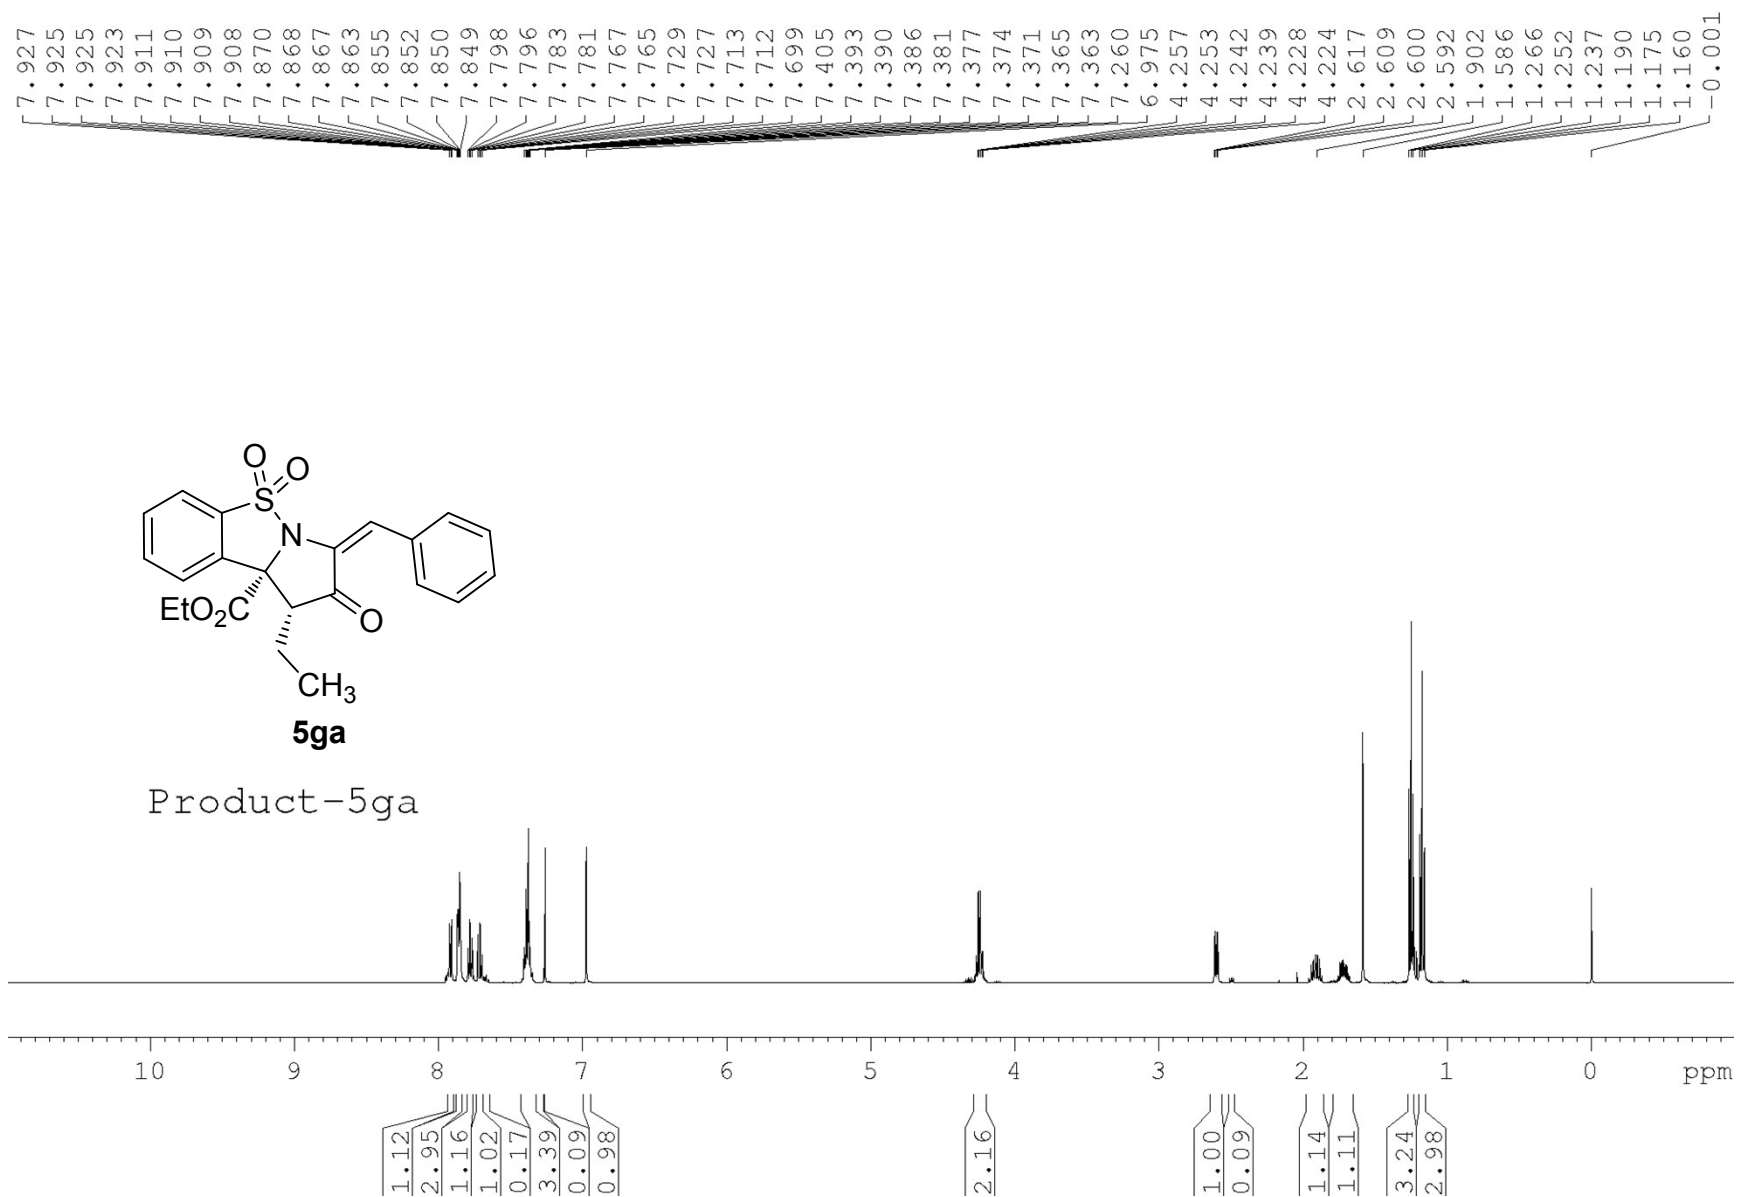

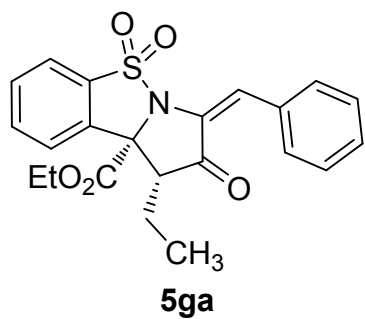

Product-5ga

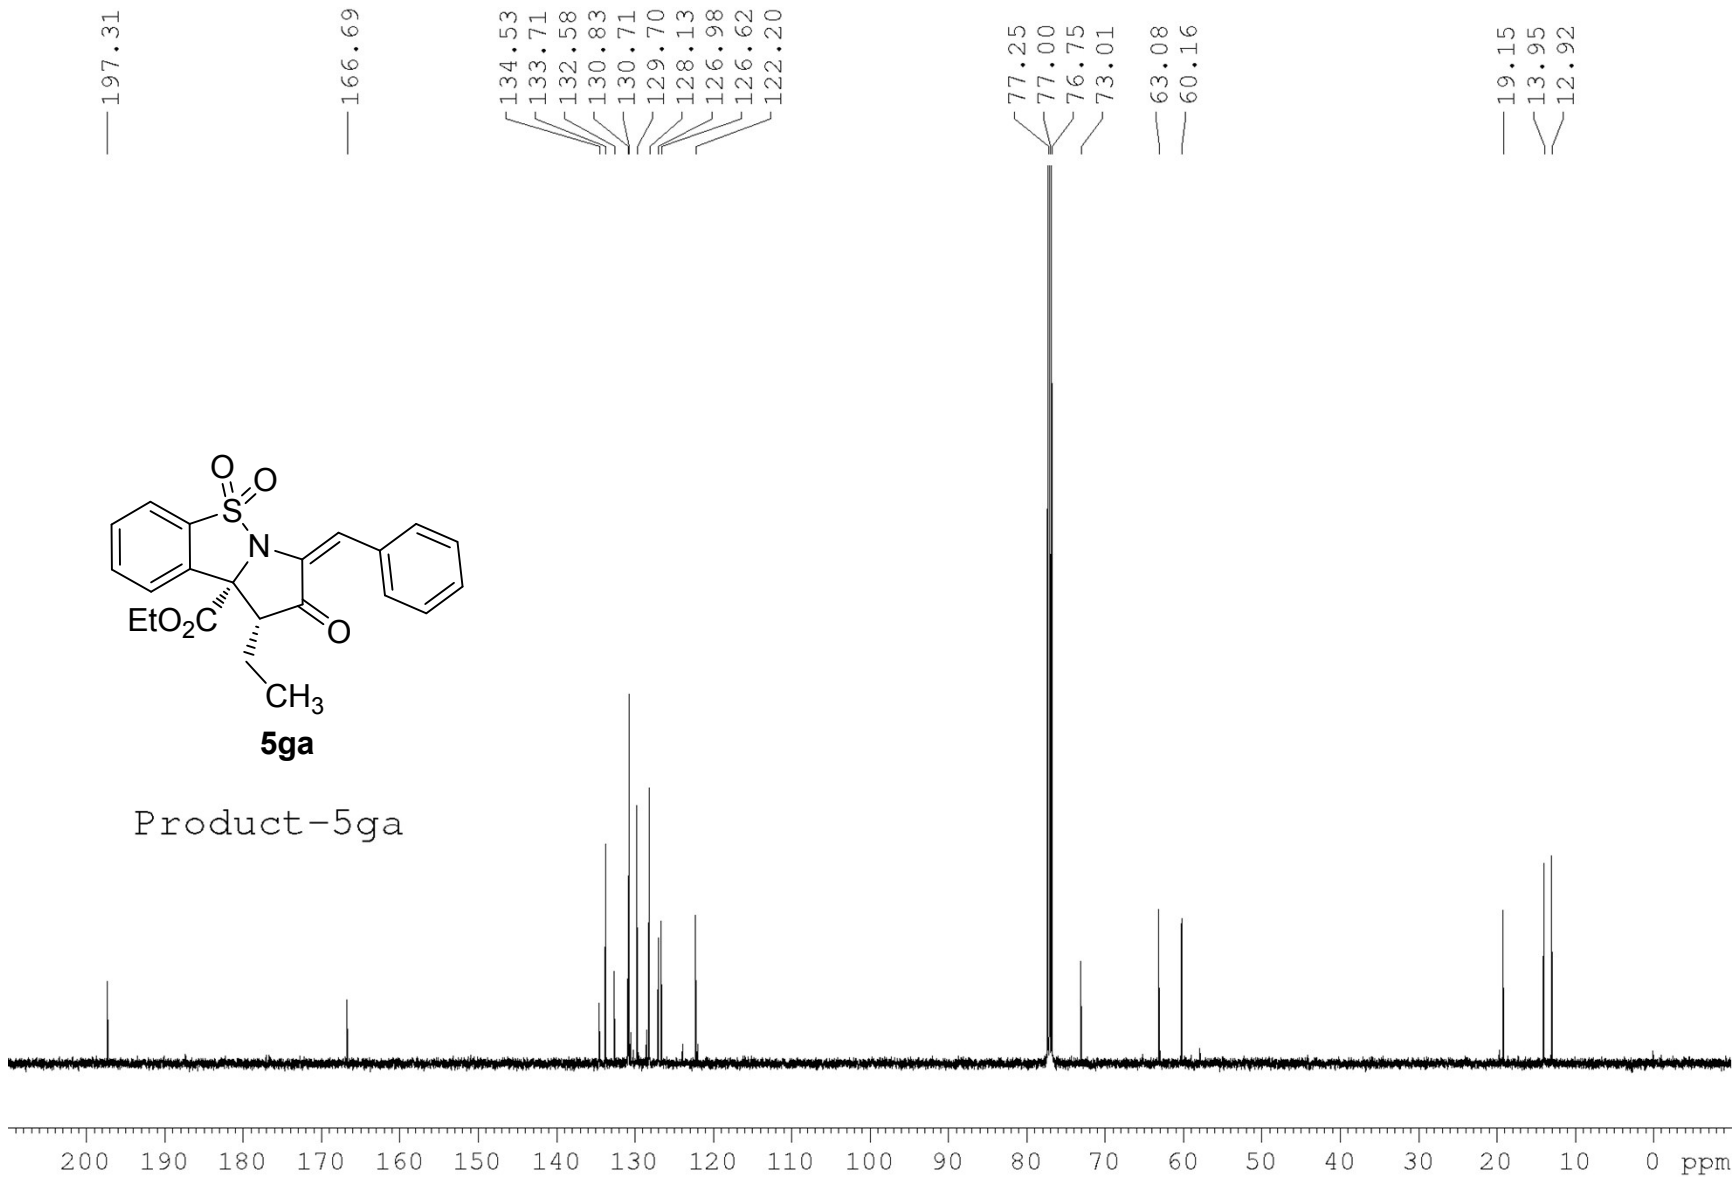

Supplement: c6ob01096b2.pdf [file c6ob01096b2.pdf]
