# Supplementary material for: Stereoselective synthesis of cyclopentanone-fused benzosultams through Tomita zipper cyclization
Source: Royal Society of Chemistry journal article supplement (doi:10.1039/c6ob01096b), 2016-01-01
Supplement: c6ob01096b1.pdf [file c6ob01096b1.pdf]

## Supporting Information-I

# Stereoselective Synthesis of Cyclopentanone-fused Benzosultams through Tomita Zipper Cyclization

Dhevalapally B. Ramachary,\* Patoju M. Krishna, and T. Prabhakar Reddy

*Catalysis Laboratory, School of Chemistry, University of Hyderabad, Central University (P.O.),  
Hyderabad 500 046, India*

*E-mail: [ramsc@uohyd.ac.in](mailto:ramsc@uohyd.ac.in) or [ramchary.db@gmail.com](mailto:ramchary.db@gmail.com)*

**General Methods:** The  $^1\text{H}$  NMR and  $^{13}\text{C}$  NMR spectra were recorded at 400 MHz and 100 MHz, respectively. The chemical shifts are reported in ppm downfield to TMS ( $\delta = 0$ ) for  $^1\text{H}$  NMR and relative to the central  $\text{CDCl}_3$  resonance ( $\delta = 77.0$ ) for  $^{13}\text{C}$  NMR. *In the  $^{13}\text{C}$  NMR spectra, the nature of the carbons (C, CH,  $\text{CH}_2$  or  $\text{CH}_3$ ) was determined by recording the DEPT-135 experiment, and is given in parentheses.* The coupling constants  $J$  are given in Hz. Column chromatography was performed using Acme's silica gel (particle size 0.063-0.200 mm). High-resolution mass spectra (HRMS) were recorded on ESI-TOF maXis. GCMS mass spectrometry was performed on Shimadzu GCMS-QP2010 mass spectrometer. IR spectra were recorded on JASCO FT/IR-5300. Elemental analyses were recorded on a Thermo Finnigan Flash EA 1112 analyzer. Mass spectra were recorded on either VG7070H mass spectrometer using EI technique or Shimadzu-LCMS-2010 A mass spectrometer. The X-ray diffraction measurements were carried out at 298 K on an automated Enraf-Nonious MACH 3 diffractometer using graphite monochromated, Mo-K $\alpha$  ( $\lambda = 0.71073 \text{ \AA}$ ) radiation with CAD4 software or the X-ray intensity data were measured at 298 K on a Bruker SMART APEX CCD area detector system equipped with a graphite monochromator and a Mo-K $\alpha$  fine-focus sealed tube ( $\lambda = 0.71073 \text{ \AA}$ ). For thin-layer chromatography (TLC), silica gel plates Merck 60 F254 were used and compounds were

visualized by irradiation with UV light and/or by treatment with a solution of *p*-anisaldehyde (23 mL), conc. H<sub>2</sub>SO<sub>4</sub> (35 mL), acetic acid (10 mL), and ethanol (900 mL) followed by heating.

**Materials:** All solvents and commercially available chemicals were used as received. Ynones **1a-g** and olefins **2a-d** were prepared according to the literature procedure.<sup>1</sup>

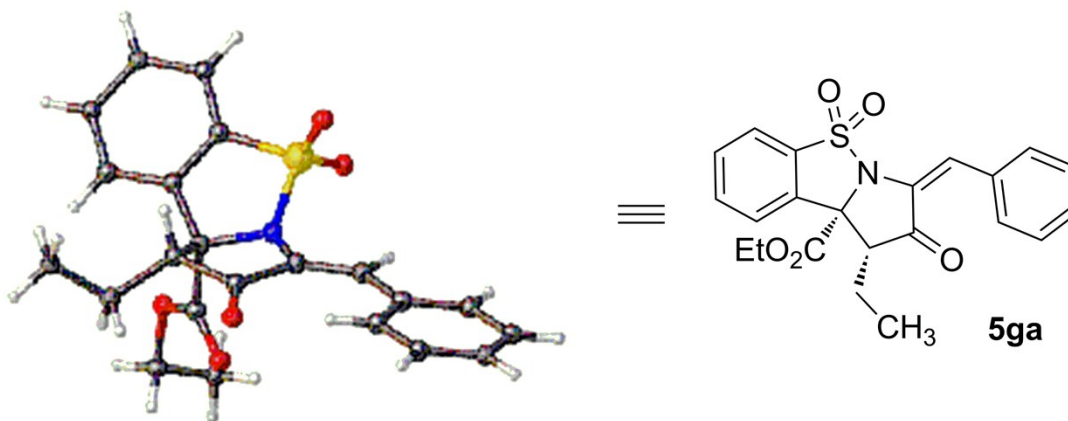

**Figure S1:** X-Ray crystal structure of (1*R*<sup>\*</sup>,9*bS*<sup>\*</sup>,*E*)-ethyl 3-benzylidene-1-ethyl-2-oxo-1,2,3,9*b*-tetrahydrobenzo[*d*]pyrrolo[1,2-*b*]isothiazole-9*b*-carboxylate 5,5-dioxide (**5ga**).

## General Experimental Procedures

**Procedure A: General Procedure for Phosphine-Catalyzed TZC [3+2]-Cycloaddition of Ynones with Cyclic *N*-Sulfonyl  $\alpha$ -Iminoesters:** In an ordinary glass vial equipped with a magnetic stirring bar was taken a mixture phosphine catalyst **3a** (20 mol-%) and acetic acid **4e** (20 mol-%) in dichloroethane. Then 0.6 mmol of ynone **1**, 0.3 mmol of cyclic *N*-sulfonyl  $\alpha$ -iminoesters **2** were added sequentially to the reaction mixture was stirred at ambient temperature for 3-9 h. The reaction mixture was concentrated and pure products **5** and **6** were obtained by column chromatography (silica gel, mixture of hexane/ethyl acetate).

\*\*\*\*\*

**(S\*,E)-Ethyl 3-benzylidene-2-oxo-1,2,3,9b-tetrahydrobenzo[d]pyrrolo[1,2-b]isothiazole-9b-carboxylate 5,5-dioxide (5aa):** Prepared following the procedure A and purified by column

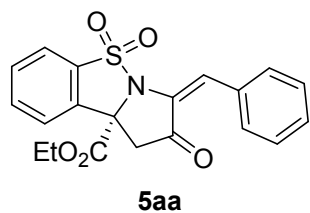

chromatography using EtOAc/hexane and isolated as off white solid.

Mp 102 °C; *dr* = 2.2:1; IR (KBr):  $\nu_{\max}$  2919, 1742, 1636, 1606, 1444, 1323, 1181, 1126, 1070, 858, 757, 691, 611 and 580  $\text{cm}^{-1}$ ;  $^1\text{H}$  NMR ( $\text{CDCl}_3$ , 400 MHz, major isomer)  $\delta$  7.98 (1H, d,  $J$  = 7.2 Hz), 7.90 (1H, d,  $J$  = 7.6 Hz), 7.87-7.85 (1H, m), 7.74 (1H, d,  $J$  = 7.6 Hz), 7.69 (1H, d,  $J$  = 7.2 Hz), 7.62 (1H, d,  $J$  = 7.6 Hz), 7.38-7.37 (3H, m), 7.00 (1H, s), 4.25 (2H, q,  $J$  = 6.8 Hz), 3.57 (1H, d,  $J$  = 18.0 Hz), 2.89 (1H, d,  $J$  = 18.0 Hz), 1.24 (3H, t,  $J$  = 6.8 Hz);  $^{13}\text{C}$  NMR ( $\text{CDCl}_3$ , DEPT-135, major isomer)  $\delta$  194.6 (C, C=O), 168.9 (C, O-C=O), 135.7 (C), 134.3 (CH), 133.9 (C), 132.4 (C), 131.0 (2 x CH), 130.6 (CH), 130.1 (CH), 129.3 (C), 128.6 (CH), 128.2 (2 x CH), 125.0 (CH), 122.3 (CH), 69.6 (C), 63.5 ( $\text{CH}_2$ ), 47.2 ( $\text{CH}_2$ ), 13.9 ( $\text{CH}_3$ );  $^1\text{H}$  NMR ( $\text{CDCl}_3$ , 400 MHz, minor isomer)  $\delta$  7.87-7.85 (3H, m), 7.78-7.76 (2H, m), 7.65 (1H, d,  $J$  = 7.2 Hz), 7.43-7.40 (3H, m), 7.22 (1H, s), 4.32-4.23 (2H, m), 3.57 (1H, d,  $J$  = 18.0 Hz), 2.79 (1H, d,  $J$  = 18.4 Hz), 1.28 (3H, t,  $J$  = 7.2 Hz);  $^{13}\text{C}$  NMR ( $\text{CDCl}_3$ , DEPT-135, minor isomer)  $\delta$  196.6 (C, C=O), 169.0 (C, O-C=O), 135.6 (C), 134.3 (CH), 133.9 (C), 132.4 (C), 131.0 (2 x CH), 130.5 (CH), 130.1 (CH), 129.1 (C), 128.65 (2 x CH), 128.56 (CH), 124.8 (CH), 122.0 (CH), 70.8 (C), 63.5 ( $\text{CH}_2$ ), 45.3 ( $\text{CH}_2$ ), 13.9 ( $\text{CH}_3$ ); HRMS  $m/z$  406.0727 ( $\text{M} + \text{Na}^+$ ), calcd for  $\text{C}_{20}\text{H}_{17}\text{NO}_5\text{SNa}$  406.0725.

**(S\*,E)-Ethyl 3-(4-methylbenzylidene)-2-oxo-1,2,3,9b-tetrahydrobenzo[d]pyrrolo[1,2-b]isothiazole-9b-carboxylate 5,5-dioxide (5ba):** Prepared following the procedure A and purified by column

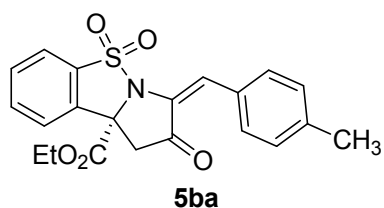

chromatography using EtOAc/hexane and isolated as semi off white solid; *dr* = 3.6:1; IR (KBr):  $\nu_{\max}$  2919, 1737, 1631, 1611, 1505, 1449, 1323, 1181, 1060, 904, 813, 757, 590 and 570  $\text{cm}^{-1}$ ;

$^1\text{H}$  NMR ( $\text{CDCl}_3$ , 400 MHz, major isomer)  $\delta$  7.90-7.88 (1H, m), 7.79 (2H, d,  $J$  = 8.4 Hz), 7.75-7.71 (1H, m), 7.67 (1H, d,  $J$  = 7.2 Hz), 7.61 (1H, d,  $J$  = 8.0 Hz), 7.18 (2H, d,  $J$  = 8.0 Hz), 6.95 (1H, s), 4.24 (2H, q,  $J$  = 7.2 Hz), 3.55 (1H, d,  $J$  = 18.0 Hz), 2.87 (1H, d,  $J$  = 18.0 Hz), 2.37 (3H, s), 1.23 (3H, t,  $J$  = 7.2 Hz);  $^{13}\text{C}$  NMR ( $\text{CDCl}_3$ , DEPT-135, major isomer)  $\delta$  194.4 (C, C=O), 168.8 (C, O-C=O), 140.6 (C), 135.6 (C), 134.1 (CH), 133.8 (C), 131.0 (2 x CH), 130.9 (CH), 129.7 (C), 129.1 (CH), 128.9 (2 x CH), 128.5 (C), 124.9 (CH), 122.2 (CH), 69.5 (C), 63.3 ( $\text{CH}_2$ ), 45.3 ( $\text{CH}_2$ ), 13.9 ( $\text{CH}_3$ ); HRMS  $m/z$  406.0727 ( $\text{M} + \text{Na}^+$ ), calcd for  $\text{C}_{20}\text{H}_{17}\text{NO}_5\text{SNa}$  406.0725.

47.2 (CH<sub>2</sub>), 21.5 (CH<sub>3</sub>), 13.8 (CH<sub>3</sub>); HRMS *m/z* 420.0882 (M + Na<sup>+</sup>), calcd for C<sub>21</sub>H<sub>19</sub>NO<sub>5</sub>SNa 420.0882.

**(S\*,E)-Ethyl 3-(4-fluorobenzylidene)-2-oxo-1,2,3,9b-tetrahydrobenzo[d]pyrrolo[1,2-b]isothiazole-9b-carboxylate 5,5-dioxide (5ca):** Prepared following the procedure A and

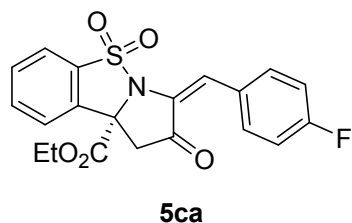

purified by column chromatography using EtOAc/hexane and

isolated as off white solid. Mp 106 °C; *dr* = 3.4:1; IR (KBr):  $\nu_{\max}$

1732, 1641, 1601, 1505, 1323, 1237, 1186, 1065, 833, 752, 595 and

570 cm<sup>-1</sup>; <sup>1</sup>H NMR (CDCl<sub>3</sub>, 400 MHz, major isomer)  $\delta$  7.91-7.87

(3H, m), 7.77-7.73 (1H, m), 7.69 (1H, d, *J* = 7.2 Hz), 7.62 (1H, d, *J*

= 7.6 Hz), 7.05 (2H, t, *J* = 8.8 Hz), 6.92 (1H, s), 4.25 (2H, q, *J* = 7.2 Hz), 3.57 (1H, d, *J* = 18.0

Hz), 2.89 (1H, d, *J* = 18.0 Hz), 1.23 (3H, t, *J* = 7.2 Hz); <sup>13</sup>C NMR (CDCl<sub>3</sub>, DEPT-135, major

isomer)  $\delta$  194.6 (C, C=O), 168.8 (C, O-C=O), 163.5 (C, d, *J* = 251.0 Hz), 135.6 (C), 134.2 (CH),

133.8 (C), 133.2 (2 x CH, d, *J* = 8.0 Hz), 130.0 (CH), 128.8 (C, d, *J* = 33.0 Hz), 127.4 (CH),

124.9 (CH + C), 122.3 (CH), 115.3 (2 x CH, d, *J* = 22.0 Hz), 69.6 (C), 63.5 (CH<sub>2</sub>), 47.2 (CH<sub>2</sub>),

13.8 (CH<sub>3</sub>); HRMS *m/z* 424.0633 (M + Na<sup>+</sup>), calcd for C<sub>20</sub>H<sub>16</sub>FNO<sub>5</sub>SNa 424.0631.

**(S\*,E)-Ethyl 3-(4-methoxybenzylidene)-2-oxo-1,2,3,9b-tetrahydrobenzo[d]pyrrolo[1,2-b]isothiazole-9b-carboxylate 5,5-dioxide (5da):** Prepared following the procedure A and

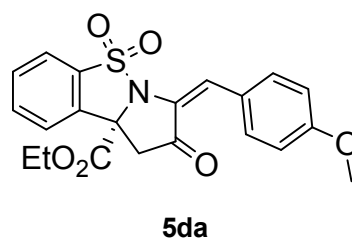

purified by column chromatography using EtOAc/hexane and

isolated as semi solid; *dr* = 1.7:1; IR (Neat):  $\nu_{\max}$  2974, 2944,

1737, 1636, 1601, 1510, 1338, 1257, 1166, 1025, 858, 757 and 626

cm<sup>-1</sup>; <sup>1</sup>H NMR (CDCl<sub>3</sub>, 400 MHz, major isomer)  $\delta$  7.95 (2H, d, *J* =

8.8 Hz), 7.90 (1H, d, *J* = 7.6 Hz), 7.74-7.72 (1H, m), 7.69-7.67

(1H, m), 7.61 (1H, d, *J* = 7.6 Hz), 6.94 (1H, s), 6.90 (2H, d, *J* = 8.8 Hz), 4.24 (2H, q, *J* = 7.2 Hz),

3.84 (3H, s), 3.56 (1H, d, *J* = 17.6 Hz), 2.88 (1H, d, *J* = 18.0 Hz), 1.23 (3H, t, *J* = 7.2 Hz); <sup>13</sup>C

NMR (CDCl<sub>3</sub>, DEPT-135, major isomer)  $\delta$  194.5 (C, C=O), 168.9 (C, O-C=O), 161.3 (C), 135.7

(C), 134.1 (CH), 133.8 (C), 133.3 (2 x CH), 130.9 (CH), 129.9 (CH), 127.5 (C), 125.4 (C), 124.8

(CH), 122.3 (CH), 113.7 (2 x CH), 69.8 (C), 63.4 (CH<sub>2</sub>), 55.3 (CH<sub>3</sub>), 47.3 (CH<sub>2</sub>), 13.8 (CH<sub>3</sub>); <sup>1</sup>H

NMR (CDCl<sub>3</sub>, 400 MHz, minor isomer)  $\delta$  8.00 (2H, d, *J* = 9.2 Hz), 7.79 (1H, d, *J* = 8.0 Hz),

7.76-7.72 (1H, m), 7.69-7.65 (2H, m), 7.23 (1H, s), 6.94 (2H, d, *J* = 8.8 Hz), 4.30-4.22 (2H, m),

3.84 (3H, s), 3.53 (1H, d, *J* = 18.0 Hz), 2.76 (1H, d, *J* = 18.4 Hz), 1.25 (3H, t, *J* = 8.0 Hz); <sup>13</sup>C

NMR (CDCl<sub>3</sub>, DEPT-135, minor isomer)  $\delta$  196.5 (C, C=O), 169.0 (C, O-C=O), 161.5 (C), 135.6 (C), 134.2 (CH), 133.8 (C), 132.8 (2 x CH), 130.9 (CH), 127.2 (C), 126.0 (CH), 124.8 (CH), 124.6 (C), 122.0 (CH), 114.1 (2 x CH), 71.0 (C), 63.4 (CH<sub>2</sub>), 55.3 (CH<sub>3</sub>), 45.3 (CH<sub>2</sub>), 13.8 (CH<sub>3</sub>); HRMS  $m/z$  436.0835 (M + Na<sup>+</sup>), calcd for C<sub>21</sub>H<sub>19</sub>NO<sub>6</sub>SNa 436.0831.

**(S\*,E)-Ethyl 3-benzylidene-8-chloro-2-oxo-1,2,3,9b-tetrahydrobenzo[d]pyrrolo[1,2-b]isothiazole-9b-carboxylate 5,5-dioxide (5ab):** Prepared following the procedure A and

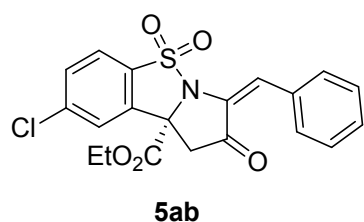

purified by column chromatography using EtOAc/hexane and isolated as semi solid;  $dr = 1.5:1$ ; IR (Neat):  $\nu_{\max}$  3085, 2924, 2843, 1732, 1621, 1449, 1328, 1267, 1181, 1090, 823, 757 and 701 cm<sup>-1</sup>; <sup>1</sup>H NMR (CDCl<sub>3</sub>, 400 MHz, major isomer)  $\delta$  7.96-7.94 (1H, m), 7.86-7.82 (2H, m), 7.71-7.59 (2H, m), 7.44-7.37 (3H, m),

6.96 (1H, s), 4.36-4.23 (2H, m), 3.52 (1H, d,  $J = 18.0$  Hz), 2.89 (1H, d,  $J = 18.0$  Hz), 1.26 (3H, t,  $J = 8.0$  Hz); <sup>13</sup>C NMR (CDCl<sub>3</sub>, DEPT-135, major isomer)  $\delta$  193.8 (C, C=O), 168.3 (C, O-C=O), 140.7 (C), 137.4 (C), 132.3 (C), 132.2 (C), 131.5 (CH), 130.9 (2 x CH), 130.4 (CH), 129.0 (C), 128.8 (CH), 128.2 (2 x CH), 125.3 (CH), 123.5 (CH), 69.0 (C), 63.7 (CH<sub>2</sub>), 47.0 (CH<sub>2</sub>), 13.8 (CH<sub>3</sub>); <sup>1</sup>H NMR (CDCl<sub>3</sub>, 400 MHz, minor isomer)  $\delta$  7.86-7.82 (2H, m), 7.71-7.59 (3H, m), 7.44-7.37 (3H, m), 7.22 (1H, s), 4.36-4.23 (2H, m), 3.52 (1H, d,  $J = 18.0$  Hz), 2.79 (1H, d,  $J = 18.4$  Hz), 1.29 (3H, t,  $J = 8.0$  Hz); <sup>13</sup>C NMR (CDCl<sub>3</sub>, DEPT-135, minor isomer)  $\delta$  195.8 (C, C=O), 168.5 (C, O-C=O), 140.8 (C), 137.3 (C), 132.3 (C), 132.2 (C), 131.5 (CH), 130.5 (CH), 130.1 (2 x CH), 128.8 (C), 128.6 (2 x CH), 125.2 (CH), 125.0 (CH), 123.2 (CH), 70.2 (C), 63.7 (CH<sub>2</sub>), 45.1 (CH<sub>2</sub>), 13.8 (CH<sub>3</sub>); LRMS  $m/z$  417.30 (M<sup>+</sup>), calcd for C<sub>20</sub>H<sub>16</sub>ClNO<sub>5</sub>S 417.04; Anal. calcd for C<sub>20</sub>H<sub>16</sub>ClNO<sub>5</sub>S (417.04): C, 57.49; H, 3.86; N, 3.35. Found: C, 57.36; H, 3.92; N, 3.41%.

**(S\*,E)-Ethyl 8-chloro-3-(4-methylbenzylidene)-2-oxo-1,2,3,9b-tetrahydrobenzo[d]pyrrolo[1,2-b]isothiazole-9b-carboxylate 5,5-dioxide (5bb):** Prepared

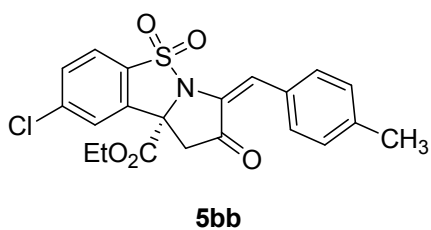

following the procedure A and purified by column chromatography using EtOAc/hexane and isolated as off white solid. Mp 98 °C;  $dr = 1.3:1$ ; IR (Neat):  $\nu_{\max}$  2914, 1737, 1636, 1601, 1338, 1262, 1181, 1141, 1085, 1035 and 813 cm<sup>-1</sup>; <sup>1</sup>H NMR (CDCl<sub>3</sub>, 400 MHz, major isomer)  $\delta$  7.83 (1H, d,  $J = 8.4$  Hz), 7.80 (2H, d,  $J = 8.0$  Hz), 7.72-7.60 (2H, m), 7.19 (2H, d,  $J = 8.0$  Hz), 6.95

(1H, s), 4.34-4.21 (2H, m), 3.51 (1H, d,  $J = 18.0$  Hz), 2.89 (1H, d,  $J = 17.6$  Hz), 2.38 (3H, s), 1.26 (3H, t,  $J = 8.0$  Hz);  $^{13}\text{C}$  NMR ( $\text{CDCl}_3$ , DEPT-135, major isomer)  $\delta$  193.8 (C, C=O), 168.4 (C, O-C=O), 140.9 (C), 140.7 (C), 137.5 (C), 132.4 (C), 131.5 (CH), 131.1 (2 x CH), 129.61 (CH), 129.57 (C), 129.0 (2 x CH), 128.3 (C), 125.3 (CH), 123.5 (CH), 69.2 (C), 63.7 (CH<sub>2</sub>), 47.1 (CH<sub>2</sub>), 21.6 (CH<sub>3</sub>), 13.8 (CH<sub>3</sub>);  $^1\text{H}$  NMR ( $\text{CDCl}_3$ , 400 MHz, minor isomer)  $\delta$  7.87 (2H, d,  $J = 8.4$  Hz), 7.72-7.60 (3H, m), 7.23 (2H, d,  $J = 7.2$  Hz), 7.22 (1H, s), 4.34-4.21 (2H, m), 3.51 (1H, d,  $J = 18.4$  Hz), 2.78 (1H, d,  $J = 18.4$  Hz), 2.38 (3H, s), 1.29 (3H, t,  $J = 8.0$  Hz);  $^{13}\text{C}$  NMR ( $\text{CDCl}_3$ , DEPT-135, minor isomer)  $\delta$  195.9 (C, C=O), 168.6 (C, O-C=O), 141.3 (C), 140.8 (C), 137.4 (C), 132.4 (C), 131.5 (CH), 130.6 (2 x CH), 129.4 (2 x CH), 129.2 (C), 128.1 (C), 125.7 (CH), 125.2 (CH), 123.2 (CH), 70.3 (C), 63.7 (CH<sub>2</sub>), 45.2 (CH<sub>2</sub>), 21.7 (CH<sub>3</sub>), 13.8 (CH<sub>3</sub>); HRMS  $m/z$  432.0673 ( $\text{M} + \text{H}^+$ ), calcd for  $\text{C}_{21}\text{H}_{18}\text{ClNO}_5\text{SH}$  432.0672.

**(S\*,E)-Ethyl**

**8-chloro-3-(4-fluorobenzylidene)-2-oxo-1,2,3,9b-**

**tetrahydrobenzo[d]pyrrolo[1,2-b]isothiazole-9b-carboxylate 5,5-dioxide (5cb):** Prepared following the procedure A and purified by column chromatography using EtOAc/hexane and isolated as semi solid;  $dr = 1.5:1$ ; IR (KBr):  $\nu_{\text{max}}$  3096, 2944, 1732, 1595, 1510, 1318, 1282,

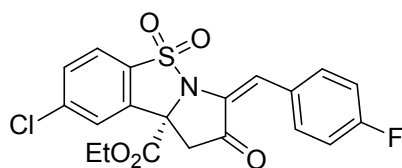

**5cb**

1237, 1090, 1065, 853, 833, 757 and 727  $\text{cm}^{-1}$ ;  $^1\text{H}$  NMR ( $\text{CDCl}_3$ , 400 MHz, major isomer)  $\delta$  7.91-7.88 (2H, m), 7.83 (1H, d,  $J = 8.0$  Hz), 7.67-7.62 (2H, m), 7.08-7.04 (2H, m), 6.91 (1H, s), 4.38-4.22 (2H, m), 3.53 (1H, d,  $J = 17.6$  Hz), 2.90 (1H, d,  $J = 17.6$  Hz), 1.31-1.24 (3H, m);  $^{13}\text{C}$  NMR ( $\text{CDCl}_3$ , DEPT-135, major isomer)  $\delta$  194.0 (C, C=O), 168.3 (C, O-C=O), 163.6 (C, d,  $J = 251.0$  Hz), 140.8 (C), 137.4 (C), 133.27 (2 x CH, d,  $J = 9.0$  Hz), 132.3 (C), 131.6 (CH), 128.7 (C), 128.5 (C, d,  $J = 3.0$  Hz), 127.8 (CH), 125.3 (CH), 123.5 (CH), 115.3 (2 x CH, d,  $J = 22.0$  Hz), 69.1 (C), 63.8 (CH<sub>2</sub>), 47.0 (CH<sub>2</sub>), 13.9 (CH<sub>3</sub>);  $^1\text{H}$  NMR ( $\text{CDCl}_3$ , 400 MHz, minor isomer)  $\delta$  7.98-7.95 (2H, m), 7.73-7.70 (3H, m), 7.18 (1H, s), 7.13-7.08 (2H, m), 4.38-4.22 (2H, m), 3.51 (1H, d,  $J = 18.4$  Hz), 2.79 (1H, d,  $J = 18.4$  Hz), 1.31-1.24 (3H, m);  $^{13}\text{C}$  NMR ( $\text{CDCl}_3$ , DEPT-135, minor isomer)  $\delta$  195.7 (C, C=O), 168.4 (C, O-C=O), 163.7 (C, d,  $J = 251.0$  Hz), 140.9 (C), 137.3 (C), 132.7 (2 x CH, d,  $J = 9.0$  Hz), 132.2 (C), 131.6 (CH), 128.8 (C), 128.3 (C, d,  $J = 3.0$  Hz), 125.3 (CH), 124.0 (CH), 123.3 (CH), 115.9 (2 x CH, d,  $J = 21.0$  Hz), 70.3 (C), 63.8 (CH<sub>2</sub>), 45.2 (CH<sub>2</sub>), 13.9 (CH<sub>3</sub>); HRMS  $m/z$  436.0422 ( $\text{M} + \text{H}^+$ ), calcd for  $\text{C}_{20}\text{H}_{15}\text{ClFNO}_5\text{SH}$  436.0422.

(*S\*,E*)-Ethyl

**8-chloro-3-(4-(methoxymethoxy)benzylidene)-2-oxo-1,2,3,9b-**

**tetrahydrobenzo[d]pyrrolo[1,2-b]isothiazole-9b-carboxylate 5,5-dioxide (5eb):** Prepared

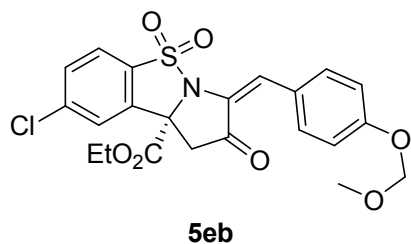

following the procedure A and purified by column chromatography using EtOAc/hexane and isolated as semi solid; *dr* = 1.6:1; IR (Neat):  $\nu_{\max}$  2934, 1727, 1631, 1606, 1510, 1333, 1242, 1176, 1146, 1080, 989, 853, 828 and 752  $\text{cm}^{-1}$ ;  $^1\text{H}$  NMR ( $\text{CDCl}_3$ , 400 MHz, major isomer)  $\delta$  7.91 (2H, d,  $J$  = 8.8 Hz), 7.82 (1H, d,  $J$  = 8.4 Hz), 7.64-7.59 (2H, m), 7.03 (2H, d,  $J$  = 8.8 Hz), 6.91 (1H, s), 5.23-5.18 (2H, m), 4.31-4.22 (2H, m), 3.52-3.46 (1H, m), 3.46 (3H, s), 2.89 (1H, d,  $J$  = 18.0 Hz), 1.24 (3H, t,  $J$  = 7.2 Hz);  $^{13}\text{C}$  NMR ( $\text{CDCl}_3$ , DEPT-135, major isomer)  $\delta$  193.8 (C, C=O), 168.4 (C, O-C=O), 158.9 (C), 140.6 (C), 137.4 (C), 133.2 (2 x CH), 132.4 (C), 131.4 (CH), 129.6 (CH), 127.2 (C), 126.2 (C), 125.2 (CH), 123.5 (CH), 115.7 (2 x CH), 94.0 ( $\text{CH}_2$ ), 69.2 (C), 63.6 ( $\text{CH}_2$ ), 56.1 ( $\text{CH}_3$ ), 47.1 ( $\text{CH}_2$ ), 13.8 ( $\text{CH}_3$ );  $^1\text{H}$  NMR ( $\text{CDCl}_3$ , 400 MHz, minor isomer)  $\delta$  7.95 (2H, d,  $J$  = 8.8 Hz), 7.72-7.68 (2H, m), 7.64-7.59 (1H, m), 7.21 (1H, s), 7.06 (2H, d,  $J$  = 8.8 Hz), 5.23-5.18 (2H, m), 4.31-4.22 (2H, m), 3.52-3.46 (4H, m), 2.76 (1H, d,  $J$  = 18.4 Hz), 1.26 (3H, t,  $J$  = 7.2 Hz);  $^{13}\text{C}$  NMR ( $\text{CDCl}_3$ , DEPT-135, minor isomer)  $\delta$  195.8 (C, C=O), 168.5 (C, O-C=O), 159.2 (C), 140.7 (C), 137.5 (C), 132.6 (2 x CH), 132.2 (C), 131.5 (CH), 127.6 (C), 125.8 (CH), 125.5 (C), 125.2 (CH), 123.2 (CH), 116.1 (2 x CH), 94.1 ( $\text{CH}_2$ ), 70.4 (C), 63.6 ( $\text{CH}_2$ ), 56.1 ( $\text{CH}_3$ ), 45.1 ( $\text{CH}_2$ ), 13.8 ( $\text{CH}_3$ ); LRMS  $m/z$  498.75 ( $\text{M}^+$ ), calcd for  $\text{C}_{22}\text{H}_{20}\text{ClNO}_7\text{S}$  498.06; Anal. calcd for  $\text{C}_{22}\text{H}_{20}\text{ClNO}_7\text{S}$  (498.06): C, 55.29; H, 4.22; N, 2.93. Found: C, 55.37; H, 4.28; N, 2.86%.

(*S\*,E*)-Ethyl

**3-benzylidene-8-methyl-2-oxo-1,2,3,9b-tetrahydrobenzo[d]pyrrolo[1,2-**

**b]isothiazole-9b-carboxylate 5,5-dioxide (5ac):** Prepared following the procedure A and

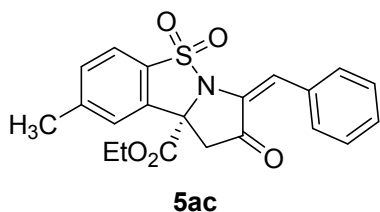

purified by column chromatography using EtOAc/hexane and isolated as off white solid. Mp 118 °C; *dr* = 2.9:1; IR (KBr):  $\nu_{\max}$  2924, 1732, 1636, 1595, 1459, 1318, 1161, 808, 757 and 696  $\text{cm}^{-1}$ ;  $^1\text{H}$  NMR ( $\text{CDCl}_3$ , 400 MHz, major isomer)  $\delta$  7.86-7.84 (2H, m), 7.77 (1H, d,  $J$  = 8.0 Hz), 7.48-7.36 (5H, m), 6.96 (1H, s), 4.30-4.23 (2H, m), 3.55 (1H, d,  $J$  = 17.6 Hz), 2.87 (1H, d,  $J$  = 18.0 Hz), 2.50 (3H, s), 1.24 (3H, t,  $J$  = 7.2 Hz);  $^{13}\text{C}$  NMR ( $\text{CDCl}_3$ , DEPT-135, major isomer)  $\delta$  194.6 (C, C=O), 169.0 (C, O-

$C=O$ ), 145.5 (C), 135.9 (C), 132.4 (C), 131.9 (CH), 131.1 (C), 130.9 (2 x CH), 129.9 (CH), 129.3 (C), 128.3 (CH), 128.1 (2 x CH), 125.0 (CH), 121.9 (CH), 69.4 (C), 63.4 (CH<sub>2</sub>), 47.2 (CH<sub>2</sub>), 21.8 (CH<sub>3</sub>), 13.8 (CH<sub>3</sub>); <sup>1</sup>H NMR (CDCl<sub>3</sub>, 400 MHz, minor isomer) δ 7.98 (2H, d,  $J$  = 7.2 Hz), 7.64 (1H, d,  $J$  = 8.0 Hz), 7.48-7.36 (5H, m), 7.21 (1H, s), 4.33-4.23 (2H, m), 3.55 (1H, d,  $J$  = 17.6 Hz), 2.76 (1H, d,  $J$  = 18.8 Hz), 2.50 (3H, s), 1.29-1.22 (3H, m); <sup>13</sup>C NMR (CDCl<sub>3</sub>, DEPT-135, minor isomer) δ 196.7 (C,  $C=O$ ), 169.1 (C,  $O-C=O$ ), 145.5 (C), 135.8 (C), 132.3 (C), 131.9 (CH), 131.1 (C), 130.5 (2 x CH), 130.3 (CH), 129.1 (C), 128.5 (2 x CH), 124.9 (CH), 124.6 (CH), 121.7 (CH), 70.6 (C), 63.4 (CH<sub>2</sub>), 45.3 (CH<sub>2</sub>), 21.8 (CH<sub>3</sub>), 13.8 (CH<sub>3</sub>); HRMS  $m/z$  420.0884 (M + Na<sup>+</sup>), calcd for C<sub>21</sub>H<sub>19</sub>NO<sub>5</sub>SNa 420.0882.

**(S\*,E)-Ethyl**

**8-methyl-3-(4-methylbenzylidene)-2-oxo-1,2,3,9b-**

**tetrahydrobenzo[d]pyrrolo[1,2-b]isothiazole-9b-carboxylate 5,5-dioxide (5bc):** Prepared

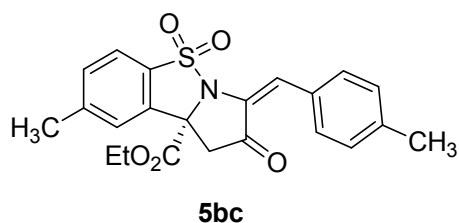

following the procedure A and purified by column chromatography using EtOAc/hexane and isolated as brown solid. Mp 132 °C;  $dr$  = 2.3:1; IR (KBr):  $\nu_{max}$  1736, 1632, 1600, 1353, 1323, 1161, 860, 810, 684, 602 and 553  $cm^{-1}$ ; <sup>1</sup>H NMR (CDCl<sub>3</sub>, 400 MHz, major isomer) δ 7.80-

7.76 (3H, m), 7.48-7.45 (1H, m), 7.39 (1H, s), 7.19 (2H, d,  $J$  = 8.0 Hz), 6.94 (1H, s), 4.26-4.22 (2H, m), 3.55 (1H, d,  $J$  = 17.6 Hz), 2.86 (1H, d,  $J$  = 17.6 Hz), 2.50 (3H, s), 2.37 (3H, s), 1.24 (3H, t,  $J$  = 7.2 Hz); <sup>13</sup>C NMR (CDCl<sub>3</sub>, DEPT-135, major isomer) δ 194.6 (C,  $C=O$ ), 169.1 (C,  $O-C=O$ ), 145.5 (C), 140.6 (C), 136.0 (C), 131.9 (CH), 131.2 (C), 131.1 (2 x CH), 129.1 (CH), 128.9 (2 x CH), 128.7 (C), 125.3 (C), 124.9 (CH), 122.0 (CH), 69.5 (C), 63.4 (CH<sub>2</sub>), 47.3 (CH<sub>2</sub>), 21.9 (CH<sub>3</sub>), 21.6 (CH<sub>3</sub>), 13.8 (CH<sub>3</sub>); <sup>1</sup>H NMR (CDCl<sub>3</sub>, 400 MHz, minor isomer) δ 7.90 (2H, d,  $J$  = 8.0 Hz), 7.65 (1H, d,  $J$  = 8.0 Hz), 7.48-7.45 (2H, m), 7.24-7.21 (3H, m), 4.26-4.22 (2H, m), 3.54 (1H, d,  $J$  = 18.4 Hz), 2.75 (1H, d,  $J$  = 18.0 Hz), 2.50 (3H, s), 2.37 (3H, s), 1.27 (3H, t,  $J$  = 7.2 Hz); <sup>13</sup>C NMR (CDCl<sub>3</sub>, DEPT-135, minor isomer) δ 196.7 (C,  $C=O$ ), 169.2 (C,  $O-C=O$ ), 145.6 (C), 141.0 (C), 135.9 (C), 131.9 (CH), 130.7 (2 x CH), 129.7 (CH), 129.44 (C), 129.37 (2 x CH), 128.4 (C), 124.9 (C), 124.8 (CH), 121.7 (CH), 70.7 (C), 63.4 (CH<sub>2</sub>), 45.3 (CH<sub>2</sub>), 21.9 (CH<sub>3</sub>), 21.7 (CH<sub>3</sub>), 13.8 (CH<sub>3</sub>); HRMS  $m/z$  412.1218 (M + H<sup>+</sup>), calcd for C<sub>22</sub>H<sub>21</sub>NO<sub>5</sub>SH 412.1219.



(*S*\*,*E*)-Ethyl

3-(4-fluorobenzylidene)-8-methyl-2-oxo-1,2,3,9b-

tetrahydrobenzo[d]pyrrolo[1,2-b]isothiazole-9b-carboxylate 5,5-dioxide (**5cc**): Prepared

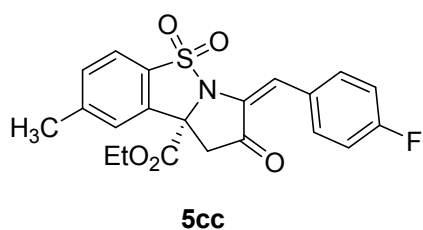

following the procedure A and purified by column chromatography using EtOAc/hexane and isolated as off white solid. Mp 110 °C; *dr* = 3.6:1; IR (KBr):  $\nu_{\max}$  2919, 2848, 1732, 1641, 1595, 1515, 1292, 1227, 1161, 1065, 833, 752 and 676  $\text{cm}^{-1}$ ;  $^1\text{H}$  NMR ( $\text{CDCl}_3$ , 400 MHz, major

isomer)  $\delta$  7.91-7.87 (2H, m), 7.77 (1H, d,  $J$  = 8.0 Hz), 7.49-7.44 (1H, m), 7.39 (1H, s), 7.12-7.03 (2H, m), 6.90 (1H, s), 4.27-4.21 (2H, m), 3.56 (1H, d,  $J$  = 17.6 Hz), 2.87 (1H, d,  $J$  = 17.6 Hz), 2.51 (3H, s), 1.29-1.22 (3H, m);  $^{13}\text{C}$  NMR ( $\text{CDCl}_3$ , DEPT-135, major isomer)  $\delta$  194.8 (C, C=O), 169.0 (C, O-C=O), 163.5 (C, d,  $J$  = 251.0 Hz), 145.6 (C), 135.9 (C), 133.2 (2 x CH, d,  $J$  = 8.0 Hz), 132.0 (CH), 131.1 (C), 129.1 (C), 128.7 (C), 127.3 (CH), 125.0 (CH), 122.0 (CH), 115.2 (2 x CH, d,  $J$  = 21.0 Hz), 69.4 (C), 63.4 ( $\text{CH}_2$ ), 47.2 ( $\text{CH}_2$ ), 21.9 ( $\text{CH}_3$ ), 13.8 ( $\text{CH}_3$ ); HRMS  $m/z$  416.0968 ( $\text{M} + \text{H}^+$ ), calcd for  $\text{C}_{21}\text{H}_{18}\text{FNO}_5\text{SH}$  416.0968.

(*S*\*,*E*)-Ethyl

3-(4-methoxybenzylidene)-8-methyl-2-oxo-1,2,3,9b-

tetrahydrobenzo[d]pyrrolo[1,2-b]isothiazole-9b-carboxylate 5,5-dioxide (**5dc**): Prepared

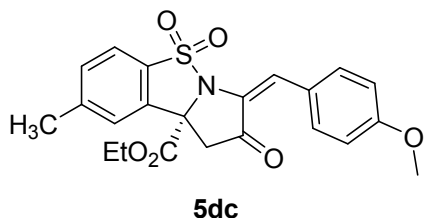

following the procedure A and purified by column chromatography using EtOAc/hexane and isolated as semi solid; *dr* = 6.7:1; IR (KBr):  $\nu_{\max}$  2974, 2924, 2858, 2353, 1732, 1626, 1601, 1570, 1318, 1262, 1171, 1025, 883, 833, 686 and 575  $\text{cm}^{-1}$ ;  $^1\text{H}$  NMR ( $\text{CDCl}_3$ , 400 MHz, major isomer)

$\delta$  8.00 (2H, d,  $J$  = 8.8 Hz), 7.66 (1H, d,  $J$  = 8.8 Hz), 7.45 (2H, s), 7.22 (1H, s), 6.93 (2H, d,  $J$  = 8.8 Hz), 4.33-4.20 (2H, m), 3.84 (3H, s), 3.51 (1H, d,  $J$  = 18.4 Hz), 2.74 (1H, d,  $J$  = 18.4 Hz), 2.51 (3H, s), 1.25 (3H, t,  $J$  = 7.2 Hz);  $^{13}\text{C}$  NMR ( $\text{CDCl}_3$ , DEPT-135, major isomer)  $\delta$  196.7 (C, C=O), 169.2 (C, O-C=O), 161.5 (C), 145.6 (C), 135.9 (C), 132.8 (2 x CH), 131.9 (CH), 131.2 (C), 127.3 (C), 125.9 (CH), 124.8 (CH), 124.7 (C), 121.8 (CH), 114.1 (2 x CH), 70.9 (C), 63.3 ( $\text{CH}_2$ ), 55.3 ( $\text{CH}_3$ ), 45.3 ( $\text{CH}_2$ ), 21.9 ( $\text{CH}_3$ ), 13.9 ( $\text{CH}_3$ ); HRMS  $m/z$  428.1165 ( $\text{M} + \text{H}^+$ ), calcd for  $\text{C}_{22}\text{H}_{21}\text{NO}_6\text{SH}$  428.1168.

(*S*\*,*E*)-Ethyl

**3-(4-(methoxymethoxy)benzylidene)-8-methyl-2-oxo-1,2,3,9b-tetrahydrobenzo[d]pyrrolo[1,2-b]isothiazole-9b-carboxylate 5,5-dioxide (5ec):**

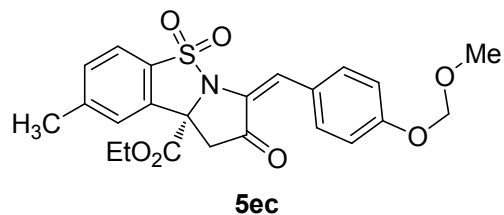

following the procedure A and purified by column chromatography using EtOAc/hexane and isolated as semi solid; *dr* = 1.7:1; IR (Neat):  $\nu_{\max}$  2954, 2919, 1737, 1631, 1601, 1510, 1328, 1242, 1166, 1080, 989, 929, 858, 737 and 681  $\text{cm}^{-1}$ ;  $^1\text{H}$  NMR ( $\text{CDCl}_3$ , 400

MHz, major isomer)  $\delta$  7.92 (2H, d,  $J$  = 8.8 Hz), 7.76 (1H, d,  $J$  = 8.0 Hz), 7.45-7.43 (1H, m), 7.38 (1H, s), 7.02 (2H, d,  $J$  = 8.8 Hz), 6.91 (1H, s), 5.21 (2H, s), 4.30-4.21 (2H, m), 3.54 (1H, d,  $J$  = 18.0 Hz), 3.47 (3H, s), 2.86 (1H, d,  $J$  = 18.0 Hz), 2.50 (3H, s), 1.23 (3H, t,  $J$  = 7.2 Hz);  $^{13}\text{C}$  NMR ( $\text{CDCl}_3$ , DEPT-135, major isomer)  $\delta$  194.7 (C, C=O), 169.1 (C, O-C=O), 158.8 (C), 145.5 (C), 136.0 (C), 133.1 (2 x CH), 131.9 (CH), 131.2 (C), 129.2 (CH), 128.0 (C), 126.4 (C), 124.9 (CH), 122.0 (CH), 115.7 (2 x CH), 94.1 ( $\text{CH}_2$ ), 69.6 (C), 63.3 ( $\text{CH}_2$ ), 56.1 ( $\text{CH}_3$ ), 47.3 ( $\text{CH}_2$ ), 21.9 ( $\text{CH}_3$ ), 13.8 ( $\text{CH}_3$ );  $^1\text{H}$  NMR ( $\text{CDCl}_3$ , 400 MHz, minor isomer)  $\delta$  7.98 (2H, d,  $J$  = 8.4 Hz), 7.66 (1H, d,  $J$  = 8.8 Hz), 7.48-7.43 (2H, m), 7.21 (1H, s), 7.06 (2H, d,  $J$  = 8.8 Hz), 5.23-5.18 (2H, m), 4.30-4.21 (2H, m), 3.52 (1H, d,  $J$  = 18.0 Hz), 3.47 (3H, s), 2.74 (1H, d,  $J$  = 18.4 Hz), 2.50 (3H, s), 1.25 (3H, t,  $J$  = 7.2 Hz);  $^{13}\text{C}$  NMR ( $\text{CDCl}_3$ , DEPT-135, minor isomer)  $\delta$  196.7 (C, C=O), 169.2 (C, O-C=O), 159.1 (C), 145.6 (C), 135.9 (C), 132.7 (2 x CH), 131.9 (CH), 131.1 (C), 127.6 (C), 125.7 (C), 125.5 (CH), 124.8 (CH), 121.8 (CH), 116.1 (2 x CH), 94.1 ( $\text{CH}_2$ ), 70.8 (C), 63.3 ( $\text{CH}_2$ ), 56.1 ( $\text{CH}_3$ ), 45.3 ( $\text{CH}_2$ ), 21.9 ( $\text{CH}_3$ ), 13.8 ( $\text{CH}_3$ ); HRMS  $m/z$  480.1093 ( $\text{M} + \text{Na}^+$ ), calcd for  $\text{C}_{23}\text{H}_{23}\text{NO}_7\text{SNa}$  480.1093.

(*S*\*,*E*)-Ethyl

**3-benzylidene-8-methoxy-2-oxo-1,2,3,9b-tetrahydrobenzo[d]pyrrolo[1,2-b]isothiazole-9b-carboxylate 5,5-dioxide (5ad):**

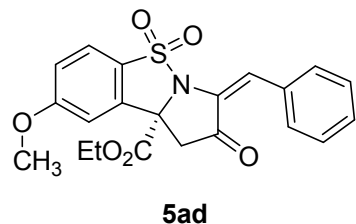

following the procedure A and purified by column chromatography using EtOAc/hexane and isolated as semi solid; *dr* = 3.2:1; IR (Neat):  $\nu_{\max}$  2919, 2858, 1732, 1590, 1479, 1464, 1323, 1292, 1247, 1176, 1070, 752 and 691  $\text{cm}^{-1}$ ;  $^1\text{H}$  NMR ( $\text{CDCl}_3$ , 400 MHz, major isomer)  $\delta$  7.87-7.85 (2H, m), 7.79 (1H, d,  $J$  = 8.4 Hz), 7.41-

7.36 (3H, m), 7.17-7.08 (1H, m), 7.01 (1H, s), 6.95 (1H, s), 4.29-4.22 (2H, m), 3.91 (3H, s), 3.55 (1H, d,  $J$  = 17.6 Hz), 2.89 (1H, d,  $J$  = 17.6 Hz), 1.25 (3H, t,  $J$  = 7.2 Hz);  $^{13}\text{C}$  NMR ( $\text{CDCl}_3$ ,

DEPT-135, major isomer)  $\delta$  194.6 (C, C=O), 168.9 (C, O-C=O), 164.3 (C), 138.1 (C), 132.4 (C), 130.9 (2 x CH), 130.0 (CH), 129.4 (C), 128.5 (CH), 128.1 (2 x CH), 125.7 (C), 123.8 (CH), 117.8 (CH), 108.8 (CH), 69.3 (C), 63.4 (CH<sub>2</sub>), 56.1 (CH<sub>3</sub>), 47.2 (CH<sub>2</sub>), 13.9 (CH<sub>3</sub>); HRMS  $m/z$  436.0833 (M + Na<sup>+</sup>), calcd for C<sub>21</sub>H<sub>19</sub>NO<sub>6</sub>SNa 436.0831.

**(S\*,E)-Ethyl**

**8-methoxy-3-(4-methylbenzylidene)-2-oxo-1,2,3,9b-**

**tetrahydrobenzo[d]pyrrolo[1,2-b]isothiazole-9b-carboxylate 5,5-dioxide (5bd):** Prepared

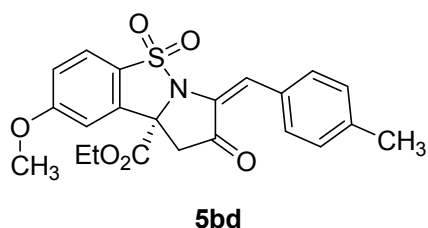

following the procedure A and purified by column chromatography using EtOAc/hexane and isolated as semi solid;  $dr = 5.5:1$ ; IR (Neat):  $\nu_{\max}$  2959, 2924, 2853, 1732, 1590, 1515, 1313, 1282, 1156, 868 and 823 cm<sup>-1</sup>; <sup>1</sup>H NMR (CDCl<sub>3</sub>, 400 MHz, major isomer)  $\delta$  7.80-7.79 (3H, m), 7.23-

7.11 (3H, m), 7.00 (1H, d,  $J = 2.0$  Hz), 6.94 (1H, s), 4.29-4.21 (2H, m), 3.91 (3H, s), 3.54 (1H, d,  $J = 18.0$  Hz), 2.89 (1H, d,  $J = 17.6$  Hz), 2.37 (3H, s), 1.24 (3H, t,  $J = 7.2$  Hz); <sup>13</sup>C NMR (CDCl<sub>3</sub>, DEPT-135, major isomer)  $\delta$  194.6 (C, C=O), 169.0 (C, O-C=O), 164.3 (C), 140.7 (C), 138.2 (C), 131.1 (2 x CH), 129.8 (C), 129.2 (CH), 128.9 (2 x CH), 128.7 (C), 125.7 (C), 123.8 (CH), 117.8 (CH), 108.7 (CH), 69.4 (C), 63.4 (CH<sub>2</sub>), 56.1 (CH<sub>3</sub>), 47.3 (CH<sub>2</sub>), 21.6 (CH<sub>3</sub>), 13.9 (CH<sub>3</sub>); HRMS  $m/z$  450.0988 (M + Na<sup>+</sup>), calcd for C<sub>22</sub>H<sub>21</sub>NO<sub>6</sub>SNa 450.0987.

**(S\*,E)-Ethyl**

**3-(4-fluorobenzylidene)-8-methoxy-2-oxo-1,2,3,9b-**

**tetrahydrobenzo[d]pyrrolo[1,2-b]isothiazole-9b-carboxylate 5,5-dioxide (5cd):** Prepared

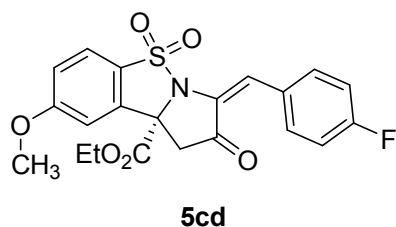

following the procedure A and purified by column chromatography using EtOAc/hexane and isolated as off white solid. Mp 120 °C;  $dr = 2.9:1$ ; IR (KBr):  $\nu_{\max}$  2924, 1732, 1606, 1464, 1328, 1166, 1010, 914, 813, 681 and 590 cm<sup>-1</sup>; <sup>1</sup>H NMR (CDCl<sub>3</sub>, 400 MHz, major isomer)  $\delta$  7.92-7.88 (2H, m), 7.80

(1H, d,  $J = 8.8$  Hz), 7.19-7.16 (1H, m), 7.13-7.04 (2H, m), 7.02-7.00 (1H, m), 6.91 (1H, s), 4.33-4.23 (2H, m), 3.92 (3H, s), 3.56 (1H, d,  $J = 18.0$  Hz), 2.90 (1H, d,  $J = 17.6$  Hz), 1.30-1.22 (3H, m); <sup>13</sup>C NMR (CDCl<sub>3</sub>, DEPT-135, major isomer)  $\delta$  194.8 (C, C=O), 168.9 (C, O-C=O), 164.3 (C), 163.4 (C, d,  $J = 251.0$  Hz), 138.1 (C), 133.2 (2 x CH, d,  $J = 7.0$  Hz), 129.1 (C), 128.7 (C, d,  $J = 3.0$  Hz), 127.4 (CH), 125.6 (C), 123.8 (CH), 117.9 (CH), 115.3 (2 x CH, d,  $J = 17.0$  Hz),

108.7 (CH), 69.3 (C), 63.5 (CH<sub>2</sub>), 56.1 (CH<sub>3</sub>), 47.2 (CH<sub>2</sub>), 13.9 (CH<sub>3</sub>); HRMS *m/z* 454.0736 (M + Na<sup>+</sup>), calcd for C<sub>21</sub>H<sub>18</sub>FNO<sub>6</sub>SNa<sup>+</sup> 454.0737.

**(1*R*\*,9*bS*\*,*E*)-Ethyl 3-benzylidene-1-methyl-2-oxo-1,2,3,9*b*-tetrahydrobenzo[*d*]pyrrolo[1,2-**

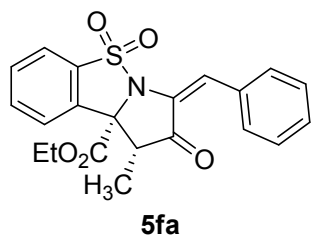

**b]isothiazole-9*b*-carboxylate 5,5-dioxide (5fa):** Prepared following the procedure **A** and purified by column chromatography using EtOAc/hexane and isolated as gummy solid; *dr* = 2.1:1, *cis:trans* = 2.8:1; IR (KBr):  $\nu_{\max}$  2924, 1737, 1641, 1454, 1333, 1232, 1181, 1025, 757, 691 and 575 cm<sup>-1</sup>; <sup>1</sup>H NMR (CDCl<sub>3</sub>, 400 MHz, major isomer)  $\delta$

7.98-7.82 (3H, m), 7.79-7.63 (3H, m), 7.42-7.37 (3H, m), 7.00 (1H, s), 4.32-4.21 (2H, m), 2.76 (1H, q, *J* = 6.8 Hz), 1.40-1.29 (3H, m), 1.27-1.23 (3H, m); <sup>13</sup>C NMR (CDCl<sub>3</sub>, DEPT-135, major isomer)  $\delta$  196.8 (C, C=O), 166.5 (C, O-C=O), 134.4 (C), 133.7 (CH), 133.6 (C), 132.5 (C), 130.7 (2 x CH), 130.8 (CH), 130.4 (CH), 129.7 (CH), 129.5 (C), 128.1 (2 x CH), 127.0 (CH), 122.1 (CH), 73.2 (C), 63.0 (CH<sub>2</sub>), 54.1 (CH), 14.0 (CH<sub>3</sub>), 9.3 (CH<sub>3</sub>); <sup>1</sup>H NMR (CDCl<sub>3</sub>, minor isomer)  $\delta$  7.98-7.82 (3H, m), 7.79-7.63 (3H, m), 7.42-7.37 (3H, m), 7.00 (1H, s), 4.32-4.21 (2H, m), 2.76 (1H, q, *J* = 6.8 Hz), 1.40-1.29 (3H, m), 1.27-1.23 (3H, m); <sup>13</sup>C NMR (CDCl<sub>3</sub>, DEPT-135, minor isomer)  $\delta$  198.8 (C, C=O), 166.5 (C, O-C=O), 134.6 (C), 133.7 (CH), 133.4 (C), 132.5 (C), 130.8 (2 x CH), 130.6 (CH), 130.2 (CH), 129.3 (C), 128.5 (2 x CH), 128.1 (CH), 126.4 (CH), 122.4 (CH), 73.7 (C), 62.9 (CH<sub>2</sub>), 51.9 (CH), 13.8 (CH<sub>3</sub>), 9.7 (CH<sub>3</sub>); HRMS *m/z* 415.1329 (M + NH<sub>4</sub><sup>+</sup>), calcd for C<sub>21</sub>H<sub>19</sub>NO<sub>5</sub>SNH<sub>4</sub> 415.1328.

**(1*R*\*,9*bS*\*,*E*)-Ethyl 3-benzylidene-1-ethyl-2-oxo-1,2,3,9*b*-tetrahydrobenzo[*d*]pyrrolo[1,2-**

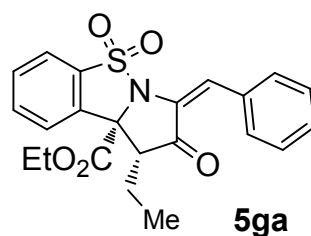

**b]isothiazole-9*b*-carboxylate 5,5-dioxide (5ga):** Prepared following the procedure **A** and purified by column chromatography using EtOAc/hexane and isolated as off white solid. Mp 118 °C; *dr* = 11.1:1; IR (KBr):  $\nu_{\max}$  2959, 2929, 1737, 1611, 1449, 1388, 1328, 1186, 1141, 1065, 934, 762, 696 and 580 cm<sup>-1</sup>; <sup>1</sup>H NMR (CDCl<sub>3</sub>, 400 MHz, major isomer)  $\delta$  7.94-7.91 (1H, m), 7.87-7.85 (3H, m), 7.78 (1H, dt, *J* = 7.5, 1.0 Hz), 7.71 (1H, dt, *J* = 8.0, 1.0 Hz), 7.41-

7.36 (3H, m), 6.97 (1H, s), 4.25 (2H, dq, *J* = 7.5, 2.0 Hz), 2.60 (1H, dd, *J* = 8.5, 4.0 Hz), 1.94-1.87 (1H, m), 1.76-1.68 (1H, m), 1.25 (3H, t, *J* = 7.5 Hz), 1.17 (3H, t, *J* = 7.5 Hz); <sup>13</sup>C NMR (CDCl<sub>3</sub>, DEPT-135, major isomer)  $\delta$  197.3 (C, C=O), 166.7 (C, O-C=O), 134.5 (C), 133.7 (CH), 132.6 (C), 130.8 (CH), 130.7 (2 x CH, C), 129.7 (CH, C), 128.1 (2 x

CH), 127.0 (CH), 126.6 (CH), 122.2 (CH), 73.0 (C), 63.1 (CH<sub>2</sub>), 60.2 (CH), 19.1 (CH<sub>2</sub>), 13.9 (CH<sub>3</sub>), 12.9 (CH<sub>3</sub>); HRMS m/z 434.1037 (M + Na<sup>+</sup>), calcd for C<sub>22</sub>H<sub>21</sub>NO<sub>5</sub>SNa 434.1038.

**References:**

1. (a) S. R. Gagne, C. Curutchet, F. Grenier, G. D. Scholes, *Tetrahedron* **2010**, *66*, 4230-4242; (b) A. Zanka, *Organic Process Research & Development* **1998**, *2*, 60-62; (c) H. Wang, T. Jiang and M.-H. Xu, *J. Am. Chem. Soc.*, **2013**, *135*, 971-974.
